# Supplementary material for: One-Pot Sequence of Staudinger/aza-Wittig/Castagnoli–Cushman Reactions Provides Facile Access to Novel Natural-like Polycyclic Ring Systems
Source: MDPI journal article supplement (doi:10.3390/molecules27238130), 2022-11-22

# One-pot sequence of Staudinger/aza-Wittig/Castagnoli-Cushman reactions provides facile access to novel natural-like polycyclic ring system

Rodion Lebedev <sup>1</sup>, Dmitry Dar'in <sup>1</sup>, Grigory Kantin <sup>1</sup>, Olga Bakulina <sup>1</sup>, and Mikhail Krasavin <sup>1,2\*</sup>

<sup>1</sup> Saint Petersburg State University, 26 Universitetskii prospect, Peterhof 198504 Russian Federation

<sup>2</sup> Immanuel Kant Baltic Federal University, Kaliningrad 236041 Russian Federation

\* Correspondence: [m.krasavin@spbu.ru](mailto:m.krasavin@spbu.ru) (M.K.), URL: <http://krasavin-group.org>

## Table of contents

|                       |     |
|-----------------------|-----|
| Crystallographic data | S2  |
| References            | S2  |
| Copies of NMR spectra | S11 |

## Crystallographic data

X-ray Single Crystal analysis was performed on Rigaku XtaLAB Synergy-S diffractometer with monochromated CuK $\alpha$  radiation. Crystal growth was performed by slow dilution of solution in DMSO at room temperature. The crystal was kept at 100 K during data collection. Using Olex2 [1], the structures were solved with the SHELXT [2] structure solution program using Intrinsic Phasing and refined with the SHELXL[3] refinement package using Least Squares minimization. Crystallographic data: CCDC 2207932 (**6a**), 2207933 (**6c**), 2207934 (**6d**), 2207935 (**6e**), 2207937 (**6f**), 2178410 (**6m**), 2207930 (**13**), 2207931 (**16**), 2207936 (**6a'**) contain the supplementary crystallographic data for this paper. These data can be obtained free of charge from The Cambridge Crystallographic Data Centre via [www.ccdc.cam.ac.uk/structures](http://www.ccdc.cam.ac.uk/structures).

## References

1. Dolomanov, O. V.; Bourhis, L. J.; Gildea, R. J.; Howard, J. A. K.; Puschmann, H., OLEX2: a complete structure solution, refinement and analysis program. *Journal of Applied Crystallography* 2009, 42, (2), 339-341, 10.1107/s0021889808042726.
2. Sheldrick, G. M., SHELXT - integrated space-group and crystal-structure determination. *Acta Crystallogr A Found Adv* 2015, 71, (Pt 1), 3-8, 10.1107/S2053273314026370.
3. Sheldrick, G. M., Crystal structure refinement with SHELXL. *Acta Crystallogr C Struct Chem* 2015, 71, (Pt 1), 3-8, 10.1107/S2053229614024218.

| Table S1. Crystal data and ORTEP representation for <b>6a</b> (CCDC 2207932) |                                                               |
|------------------------------------------------------------------------------|---------------------------------------------------------------|
| Empirical formula                                                            | C <sub>18</sub> H <sub>15</sub> NO <sub>4</sub>               |
| Formula weight                                                               | 309.31                                                        |
| Temperature/K                                                                | 100.15                                                        |
| Crystal system                                                               | triclinic                                                     |
| Space group                                                                  | P-1                                                           |
| a/Å                                                                          | 8.8480(4)                                                     |
| b/Å                                                                          | 8.8775(4)                                                     |
| c/Å                                                                          | 11.0352(5)                                                    |
| $\alpha$ /°                                                                  | 68.579(4)                                                     |
| $\beta$ /°                                                                   | 66.496(4)                                                     |
| $\gamma$ /°                                                                  | 65.896(4)                                                     |
| Volume/Å <sup>3</sup>                                                        | 704.05(6)                                                     |
| Z                                                                            | 2                                                             |
| $\rho_{\text{calc}}/\text{cm}^3$                                             | 1.459                                                         |
| $\mu/\text{mm}^{-1}$                                                         | 0.857                                                         |
| F(000)                                                                       | 324.0                                                         |
| Crystal size/mm <sup>3</sup>                                                 | 0.1 × 0.08 × 0.04                                             |
| Radiation                                                                    | CuK $\alpha$ ( $\lambda$ = 1.54184)                           |
| 2 $\theta$ range for data collection/°                                       | 9.006 to 138.454                                              |
| Index ranges                                                                 | -10 ≤ h ≤ 10, -10 ≤ k ≤ 10, -11 ≤ l ≤ 13                      |
| Reflections collected                                                        | 5951                                                          |
| Independent reflections                                                      | 2625 [R <sub>int</sub> = 0.0194, R <sub>sigma</sub> = 0.0276] |
| Data/restraints/parameters                                                   | 2625/0/209                                                    |
| Goodness-of-fit on F <sup>2</sup>                                            | 1.055                                                         |
| Final R indexes [I ≥ 2 $\sigma$ (I)]                                         | R <sub>1</sub> = 0.0336, wR <sub>2</sub> = 0.0872             |
| Final R indexes [all data]                                                   | R <sub>1</sub> = 0.0378, wR <sub>2</sub> = 0.0904             |
| Largest diff. peak/hole / e Å <sup>-3</sup>                                  | 0.26/-0.21                                                    |

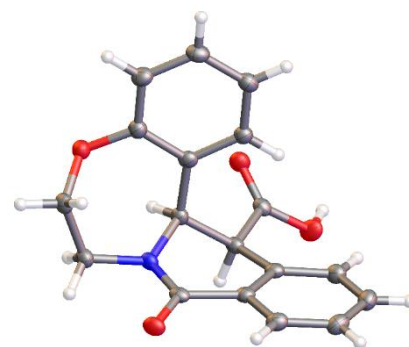

**Figure S1.** ORTEP representation of compound **6a** (thermal ellipsoids are shown at 50% probability)

| Table S2. Crystal data and ORTEP representation for 6d ( 2207933) |                                                               |
|-------------------------------------------------------------------|---------------------------------------------------------------|
| Empirical formula                                                 | C <sub>18</sub> H <sub>14</sub> ClNO <sub>4</sub>             |
| Formula weight                                                    | 343.75                                                        |
| Temperature/K                                                     | 100.15                                                        |
| Crystal system                                                    | triclinic                                                     |
| Space group                                                       | P-1                                                           |
| a/Å                                                               | 8.7472(6)                                                     |
| b/Å                                                               | 9.9319(8)                                                     |
| c/Å                                                               | 10.2459(8)                                                    |
| α/°                                                               | 69.488(7)                                                     |
| β/°                                                               | 69.344(7)                                                     |
| γ/°                                                               | 72.157(7)                                                     |
| Volume/Å <sup>3</sup>                                             | 762.94(11)                                                    |
| Z                                                                 | 2                                                             |
| ρ <sub>calc</sub> /cm <sup>3</sup>                                | 1.496                                                         |
| μ/mm <sup>-1</sup>                                                | 2.427                                                         |
| F(000)                                                            | 356                                                           |
| Crystal size/mm <sup>3</sup>                                      | 0.1 × 0.07 × 0.03                                             |
| Radiation                                                         | CuKα (λ = 1.54184)                                            |
| 2θ range for data collection/°                                    | 9.586 to 152.44                                               |
| Index ranges                                                      | -10 ≤ h ≤ 10, -8 ≤ k ≤ 12, -12 ≤ l ≤ 12                       |
| Reflections collected                                             | 5927                                                          |
| Independent reflections                                           | 3117 [R <sub>int</sub> = 0.0360, R <sub>sigma</sub> = 0.0415] |
| Data/restraints/parameters                                        | 3117/0/218                                                    |
| Goodness-of-fit on F <sup>2</sup>                                 | 1.058                                                         |
| Final R indexes [I>=2σ (I)]                                       | R1 = 0.0396, wR2 = 0.1018                                     |
| Final R indexes [all data]                                        | R1 = 0.0487, wR2 = 0.1087                                     |
| Largest diff. peak/hole / e Å <sup>-3</sup>                       | 0.34/-0.40                                                    |

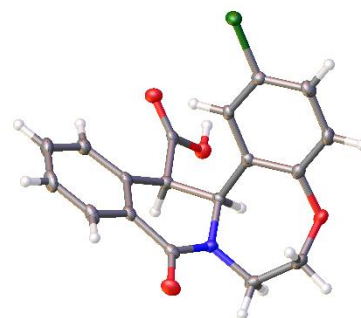

**Figure S2.** ORTEP representation of compound **6c** (thermal ellipsoids are shown at 50% probability)

| Table S3. Crystal data and ORTEP representation for <b>6d</b> (2207934) |                                                               |
|-------------------------------------------------------------------------|---------------------------------------------------------------|
| Empirical formula                                                       | C <sub>20</sub> H <sub>20</sub> BrNO <sub>5</sub> S           |
| Formula weight                                                          | 466.34                                                        |
| Temperature/K                                                           | 100.15                                                        |
| Crystal system                                                          | triclinic                                                     |
| Space group                                                             | P-1                                                           |
| a/Å                                                                     | 9.4897(5)                                                     |
| b/Å                                                                     | 9.8117(5)                                                     |
| c/Å                                                                     | 11.0978(4)                                                    |
| α/°                                                                     | 98.873(4)                                                     |
| β/°                                                                     | 97.974(4)                                                     |
| γ/°                                                                     | 98.680(5)                                                     |
| Volume/Å <sup>3</sup>                                                   | 995.28(8)                                                     |
| Z                                                                       | 2                                                             |
| ρ <sub>calc</sub> /cm <sup>3</sup>                                      | 1.556                                                         |
| μ/mm <sup>-1</sup>                                                      | 4.074                                                         |
| F(000)                                                                  | 476                                                           |
| Crystal size/mm <sup>3</sup>                                            | 0.2 × 0.16 × 0.1                                              |
| Radiation                                                               | CuKα (λ = 1.54184)                                            |
| 2θ range for data collection/°                                          | 8.176 to 152.868                                              |
| Index ranges                                                            | -11 ≤ h ≤ 11, -12 ≤ k ≤ 11, -13 ≤ l ≤ 8                       |
| Reflections collected                                                   | 7904                                                          |
| Independent reflections                                                 | 4058 [R <sub>int</sub> = 0.0323, R <sub>sigma</sub> = 0.0387] |
| Data/restraints/parameters                                              | 4058/0/256                                                    |
| Goodness-of-fit on F <sup>2</sup>                                       | 1.036                                                         |
| Final R indexes [I ≥ 2σ (I)]                                            | R <sub>1</sub> = 0.0321, wR <sub>2</sub> = 0.0811             |
| Final R indexes [all data]                                              | R <sub>1</sub> = 0.0379, wR <sub>2</sub> = 0.0859             |
| Largest diff. peak/hole / e Å <sup>-3</sup>                             | 0.47/-0.72                                                    |

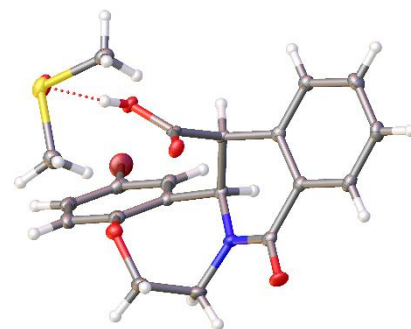

**Figure S3.** ORTEP representation of compound **6d** (thermal ellipsoids are shown at 50% probability)

| Table S4. Crystal data and ORTEP representation for <b>6e</b> (2207935) |                                                                        |
|-------------------------------------------------------------------------|------------------------------------------------------------------------|
| Empirical formula                                                       | C <sub>24</sub> H <sub>18.67</sub> N <sub>2.67</sub> O <sub>8</sub>    |
| Formula weight                                                          | 472.41                                                                 |
| Temperature/K                                                           | 100.15                                                                 |
| Crystal system                                                          | monoclinic                                                             |
| Space group                                                             | Cc                                                                     |
| a/Å                                                                     | 14.1681(3)                                                             |
| b/Å                                                                     | 12.9329(3)                                                             |
| c/Å                                                                     | 8.3714(2)                                                              |
| $\alpha/^\circ$                                                         | 90                                                                     |
| $\beta/^\circ$                                                          | 94.263(2)                                                              |
| $\gamma/^\circ$                                                         | 90                                                                     |
| Volume/Å <sup>3</sup>                                                   | 1529.69(6)                                                             |
| Z                                                                       | 3                                                                      |
| $\rho_{\text{calc}}/\text{cm}^3$                                        | 1.538                                                                  |
| $\mu/\text{mm}^{-1}$                                                    | 0.993                                                                  |
| F(000)                                                                  | 736                                                                    |
| Crystal size/mm <sup>3</sup>                                            | ? × ? × ?                                                              |
| Radiation                                                               | CuK $\alpha$ ( $\lambda$ = 1.54184)                                    |
| 2 $\theta$ range for data collection/ $^\circ$                          | 9.27 to 160.626                                                        |
| Index ranges                                                            | -17 $\leq$ h $\leq$ 17, -16 $\leq$ k $\leq$ 16, -10 $\leq$ l $\leq$ 10 |
| Reflections collected                                                   | 7704                                                                   |
| Independent reflections                                                 | 2624 [R <sub>int</sub> = 0.0396, R <sub>sigma</sub> = 0.0400]          |
| Data/restraints/parameters                                              | 2624/2/236                                                             |
| Goodness-of-fit on F <sup>2</sup>                                       | 1.094                                                                  |
| Final R indexes [I $\geq$ 2 $\sigma$ (I)]                               | R <sub>1</sub> = 0.0326, wR <sub>2</sub> = 0.0857                      |
| Final R indexes [all data]                                              | R <sub>1</sub> = 0.0346, wR <sub>2</sub> = 0.0867                      |
| Largest diff. peak/hole / e Å <sup>-3</sup>                             | 0.20/-0.17                                                             |

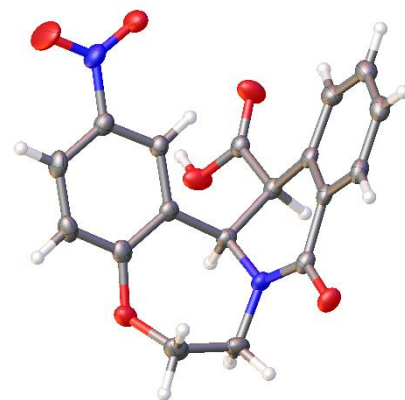

**Figure S4.** ORTEP representation of compound **6e** (thermal ellipsoids are shown at 50% probability)

| Table S5. Crystal data and ORTEP representation for <b>6f</b> (2207937) |                                                                    |
|-------------------------------------------------------------------------|--------------------------------------------------------------------|
| Empirical formula                                                       | C <sub>20</sub> H <sub>22</sub> NO <sub>6.5</sub> S <sub>0.5</sub> |
| Formula weight                                                          | 396.41                                                             |
| Temperature/K                                                           | 100.15                                                             |
| Crystal system                                                          | monoclinic                                                         |
| Space group                                                             | C2                                                                 |
| a/Å                                                                     | 24.8119(3)                                                         |
| b/Å                                                                     | 7.35890(10)                                                        |
| c/Å                                                                     | 20.2825(3)                                                         |
| $\alpha$ /°                                                             | 90                                                                 |
| $\beta$ /°                                                              | 97.5290(10)                                                        |
| $\gamma$ /°                                                             | 90                                                                 |
| Volume/Å <sup>3</sup>                                                   | 3671.42(9)                                                         |
| Z                                                                       | 8                                                                  |
| $\rho_{\text{calc}}/\text{cm}^3$                                        | 1.434                                                              |
| $\mu/\text{mm}^{-1}$                                                    | 1.405                                                              |
| F(000)                                                                  | 1672                                                               |
| Crystal size/mm <sup>3</sup>                                            | 0.15 × 0.09 × 0.05                                                 |
| Radiation                                                               | CuK $\alpha$ ( $\lambda$ = 1.54184)                                |
| 2 $\theta$ range for data collection/°                                  | 7.188 to 152.338                                                   |
| Index ranges                                                            | -31 ≤ h ≤ 31, -9 ≤ k ≤ 8, -25 ≤ l ≤ 22                             |
| Reflections collected                                                   | 8474                                                               |
| Independent reflections                                                 | 5471 [ $R_{\text{int}}$ = 0.0332, $R_{\text{sigma}}$ = 0.0380]     |
| Data/restraints/parameters                                              | 5471/1/517                                                         |
| Goodness-of-fit on F <sup>2</sup>                                       | 1.05                                                               |
| Final R indexes [ $I \geq 2\sigma(I)$ ]                                 | $R_1$ = 0.0362, $wR_2$ = 0.0958                                    |
| Final R indexes [all data]                                              | $R_1$ = 0.0386, $wR_2$ = 0.0979                                    |
| Largest diff. peak/hole / e Å <sup>-3</sup>                             | 0.51/-0.37                                                         |

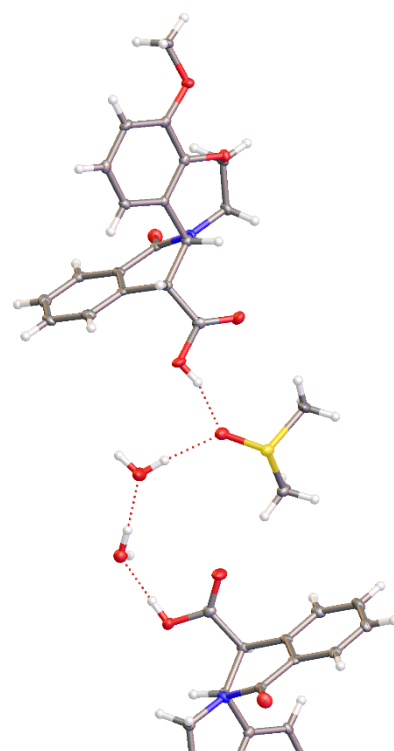

**Figure S5.** ORTEP representation of compound **6f** (thermal ellipsoids are shown at 50% probability)

| Table S6. Crystal data and ORTEP representation for <b>6m</b> (2178410) |                                                               |
|-------------------------------------------------------------------------|---------------------------------------------------------------|
| Empirical formula                                                       | C <sub>22</sub> H <sub>17</sub> NO <sub>4</sub>               |
| Formula weight                                                          | 359.36                                                        |
| Temperature/K                                                           | 100.15                                                        |
| Crystal system                                                          | triclinic                                                     |
| Space group                                                             | P-1                                                           |
| a/Å                                                                     | 8.3167(3)                                                     |
| b/Å                                                                     | 9.0975(4)                                                     |
| c/Å                                                                     | 11.7175(7)                                                    |
| α/°                                                                     | 73.755(4)                                                     |
| β/°                                                                     | 75.582(4)                                                     |
| γ/°                                                                     | 87.460(3)                                                     |
| Volume/Å <sup>3</sup>                                                   | 824.05(7)                                                     |
| Z                                                                       | 2                                                             |
| ρ <sub>calc</sub> /g/cm <sup>3</sup>                                    | 1.448                                                         |
| μ/mm <sup>-1</sup>                                                      | 0.82                                                          |
| F(000)                                                                  | 376                                                           |
| Crystal size/mm <sup>3</sup>                                            | 0.16 × 0.12 × 0.04                                            |
| Radiation                                                               | CuKα (λ = 1.54184)                                            |
| 2θ range for data collection/°                                          | 8.11 to 160.482                                               |
| Index ranges                                                            | -8 ≤ h ≤ 10, -11 ≤ k ≤ 11, -14 ≤ l ≤ 14                       |
| Reflections collected                                                   | 10082                                                         |
| Independent reflections                                                 | 3430 [R <sub>int</sub> = 0.0513, R <sub>sigma</sub> = 0.0439] |
| Data/restraints/parameters                                              | 3430/0/245                                                    |
| Goodness-of-fit on F <sup>2</sup>                                       | 1.122                                                         |
| Final R indexes [I >= 2σ (I)]                                           | R <sub>1</sub> = 0.0982, wR <sub>2</sub> = 0.3030             |
| Final R indexes [all data]                                              | R <sub>1</sub> = 0.1037, wR <sub>2</sub> = 0.3048             |
| Largest diff. peak/hole / e Å <sup>-3</sup>                             | 0.85/-0.52                                                    |

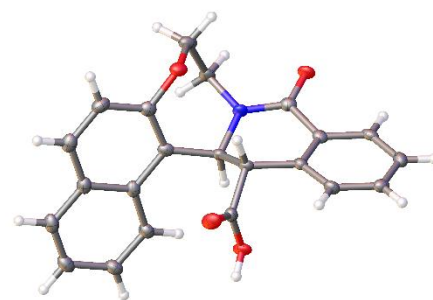

**Figure S6.** ORTEP representation of compound **6m** (thermal ellipsoids are shown at 50% probability)

| Table S7. Crystal data and ORTEP representation for <b>13</b> (2207930) |                                                                     |
|-------------------------------------------------------------------------|---------------------------------------------------------------------|
| Empirical formula                                                       | C <sub>16.8</sub> H <sub>16</sub> N <sub>1.6</sub> O <sub>3.2</sub> |
| Formula weight                                                          | 291.51                                                              |
| Temperature/K                                                           | 100.15                                                              |
| Crystal system                                                          | monoclinic                                                          |
| Space group                                                             | Ia                                                                  |
| a/Å                                                                     | 13.1227(3)                                                          |
| b/Å                                                                     | 8.3329(2)                                                           |
| c/Å                                                                     | 16.2683(3)                                                          |
| α/°                                                                     | 90                                                                  |
| β/°                                                                     | 93.697(2)                                                           |
| γ/°                                                                     | 90                                                                  |
| Volume/Å <sup>3</sup>                                                   | 1775.24(7)                                                          |
| Z                                                                       | 5                                                                   |
| ρ <sub>calc</sub> /cm <sup>3</sup>                                      | 1.363                                                               |
| μ/mm <sup>-1</sup>                                                      | 0.78                                                                |
| F(000)                                                                  | 768                                                                 |
| Crystal size/mm <sup>3</sup>                                            | 0.28 × 0.18 × 0.12                                                  |
| Radiation                                                               | CuKα (λ = 1.54184)                                                  |
| 2θ range for data collection/°                                          | 10.9 to 152.632                                                     |
| Index ranges                                                            | -13 ≤ h ≤ 16, -10 ≤ k ≤ 10, -19 ≤ l ≤ 20                            |
| Reflections collected                                                   | 7455                                                                |
| Independent reflections                                                 | 2852 [R <sub>int</sub> = 0.0213, R <sub>sigma</sub> = 0.0208]       |
| Data/restraints/parameters                                              | 2852/2/246                                                          |
| Goodness-of-fit on F <sup>2</sup>                                       | 1.057                                                               |
| Final R indexes [I ≥ 2σ (I)]                                            | R <sub>1</sub> = 0.0288, wR <sub>2</sub> = 0.0756                   |
| Final R indexes [all data]                                              | R <sub>1</sub> = 0.0289, wR <sub>2</sub> = 0.0758                   |
| Largest diff. peak/hole / e Å <sup>-3</sup>                             | 0.30/-0.17                                                          |

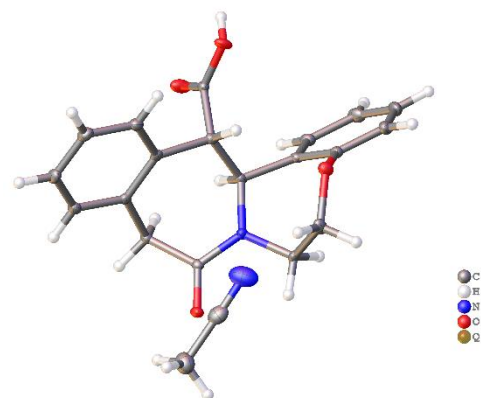

**Figure S7.** ORTEP representation of compound **13** (thermal ellipsoids are shown at 50% probability)



| Table S8. Crystal data and ORTEP representation for <b>16</b> (2207931) |                                                               |
|-------------------------------------------------------------------------|---------------------------------------------------------------|
| Empirical formula                                                       | C <sub>13</sub> H <sub>13</sub> NO <sub>4</sub> S             |
| Formula weight                                                          | 279.3                                                         |
| Temperature/K                                                           | 100.15                                                        |
| Crystal system                                                          | monoclinic                                                    |
| Space group                                                             | P2 <sub>1</sub> /c                                            |
| a/Å                                                                     | 13.3435(2)                                                    |
| b/Å                                                                     | 8.09740(10)                                                   |
| c/Å                                                                     | 11.9013(2)                                                    |
| α/°                                                                     | 90                                                            |
| β/°                                                                     | 109.952(2)                                                    |
| γ/°                                                                     | 90                                                            |
| Volume/Å <sup>3</sup>                                                   | 1208.73(3)                                                    |
| Z                                                                       | 4                                                             |
| ρ <sub>calc</sub> /cm <sup>3</sup>                                      | 1.535                                                         |
| μ/mm <sup>-1</sup>                                                      | 2.494                                                         |
| F(000)                                                                  | 584                                                           |
| Crystal size/mm <sup>3</sup>                                            | 0.14 × 0.12 × 0.08                                            |
| Radiation                                                               | CuKα (λ = 1.54184)                                            |
| 2θ range for data collection/°                                          | 7.048 to 138.17                                               |
| Index ranges                                                            | -16 ≤ h ≤ 15, -9 ≤ k ≤ 9, -14 ≤ l ≤ 14                        |
| Reflections collected                                                   | 5547                                                          |
| Independent reflections                                                 | 2252 [R <sub>int</sub> = 0.0271, R <sub>sigma</sub> = 0.0261] |
| Data/restraints/parameters                                              | 2252/0/173                                                    |
| Goodness-of-fit on F <sup>2</sup>                                       | 1.051                                                         |
| Final R indexes [I ≥ 2σ (I)]                                            | R <sub>1</sub> = 0.0319, wR <sub>2</sub> = 0.0858             |
| Final R indexes [all data]                                              | R <sub>1</sub> = 0.0329, wR <sub>2</sub> = 0.0869             |
| Largest diff. peak/hole / e Å <sup>-3</sup>                             | 0.27/-0.28                                                    |

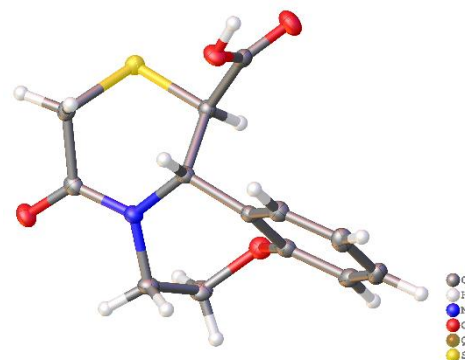

**Figure S8.** ORTEP representation of compound **16** (thermal ellipsoids are shown at 50% probability)

| Table S9. Crystal data and ORTEP representation for 6a' (2207936) |                                                               |
|-------------------------------------------------------------------|---------------------------------------------------------------|
| Empirical formula                                                 | C <sub>18</sub> H <sub>15</sub> NO <sub>4</sub>               |
| Formula weight                                                    | 309.31                                                        |
| Temperature/K                                                     | 100.15                                                        |
| Crystal system                                                    | monoclinic                                                    |
| Space group                                                       | P2 <sub>1</sub> /c                                            |
| a/Å                                                               | 10.9679(3)                                                    |
| b/Å                                                               | 9.2236(2)                                                     |
| c/Å                                                               | 14.4744(3)                                                    |
| α/°                                                               | 90                                                            |
| β/°                                                               | 100.629(2)                                                    |
| γ/°                                                               | 90                                                            |
| Volume/Å <sup>3</sup>                                             | 1439.16(6)                                                    |
| Z                                                                 | 4                                                             |
| ρ <sub>calc</sub> /g/cm <sup>3</sup>                              | 1.428                                                         |
| μ/mm <sup>-1</sup>                                                | 0.839                                                         |
| F(000)                                                            | 648.0                                                         |
| Crystal size/mm <sup>3</sup>                                      | 0.06 × 0.04 × 0.02                                            |
| Radiation                                                         | CuKα (λ = 1.54184)                                            |
| 2θ range for data collection/°                                    | 8.202 to 159.218                                              |
| Index ranges                                                      | -13 ≤ h ≤ 13, -10 ≤ k ≤ 11, -18 ≤ l ≤ 18                      |
| Reflections collected                                             | 10838                                                         |
| Independent reflections                                           | 3036 [R <sub>int</sub> = 0.0495, R <sub>sigma</sub> = 0.0406] |
| Data/restraints/parameters                                        | 3036/0/209                                                    |
| Goodness-of-fit on F <sup>2</sup>                                 | 1.035                                                         |
| Final R indexes [I ≥ 2σ (I)]                                      | R <sub>1</sub> = 0.0415, wR <sub>2</sub> = 0.1040             |
| Final R indexes [all data]                                        | R <sub>1</sub> = 0.0487, wR <sub>2</sub> = 0.1081             |
| Largest diff. peak/hole / e Å <sup>-3</sup>                       | 0.22/-0.23                                                    |

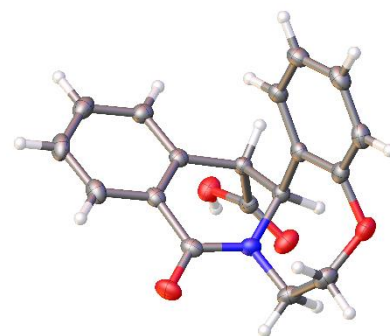

**Figure S9.** ORTEP representation of compound **6a'** (thermal ellipsoids are shown at 50% probability)

Copies of  $^1\text{H}$  400.13 MHz,  $\text{CDCl}_3$  and  $^{13}\text{C}$  100.61 MHz,  $\text{CDCl}_3$  spectra of **1a**

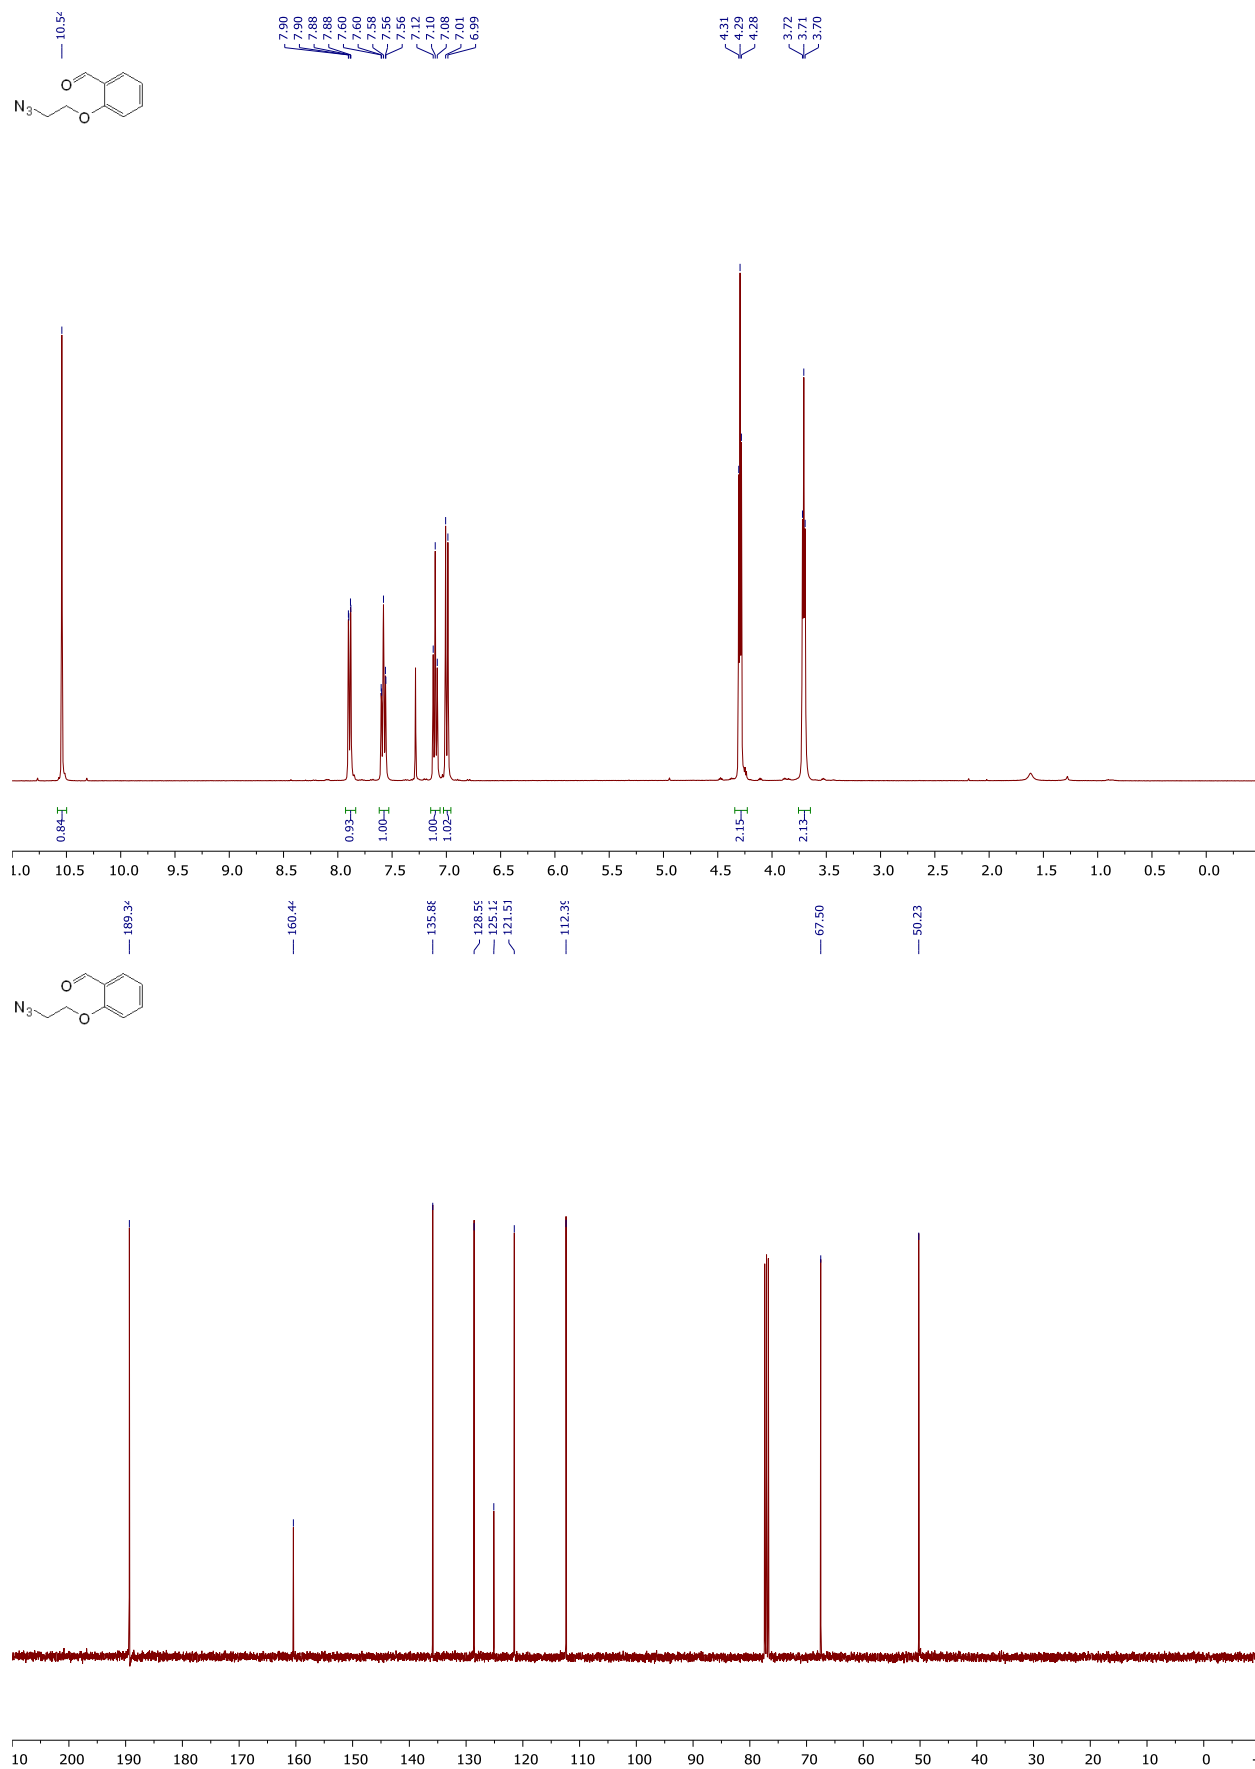

Copies of  $^1\text{H}$  400.13 MHz,  $\text{CDCl}_3$ ,  $^{13}\text{C}$  100.61 MHz,  $\text{CDCl}_3$  and  $^{19}\text{F}$  376.50 MHz,  $\text{CDCl}_3$  spectra of **1b**

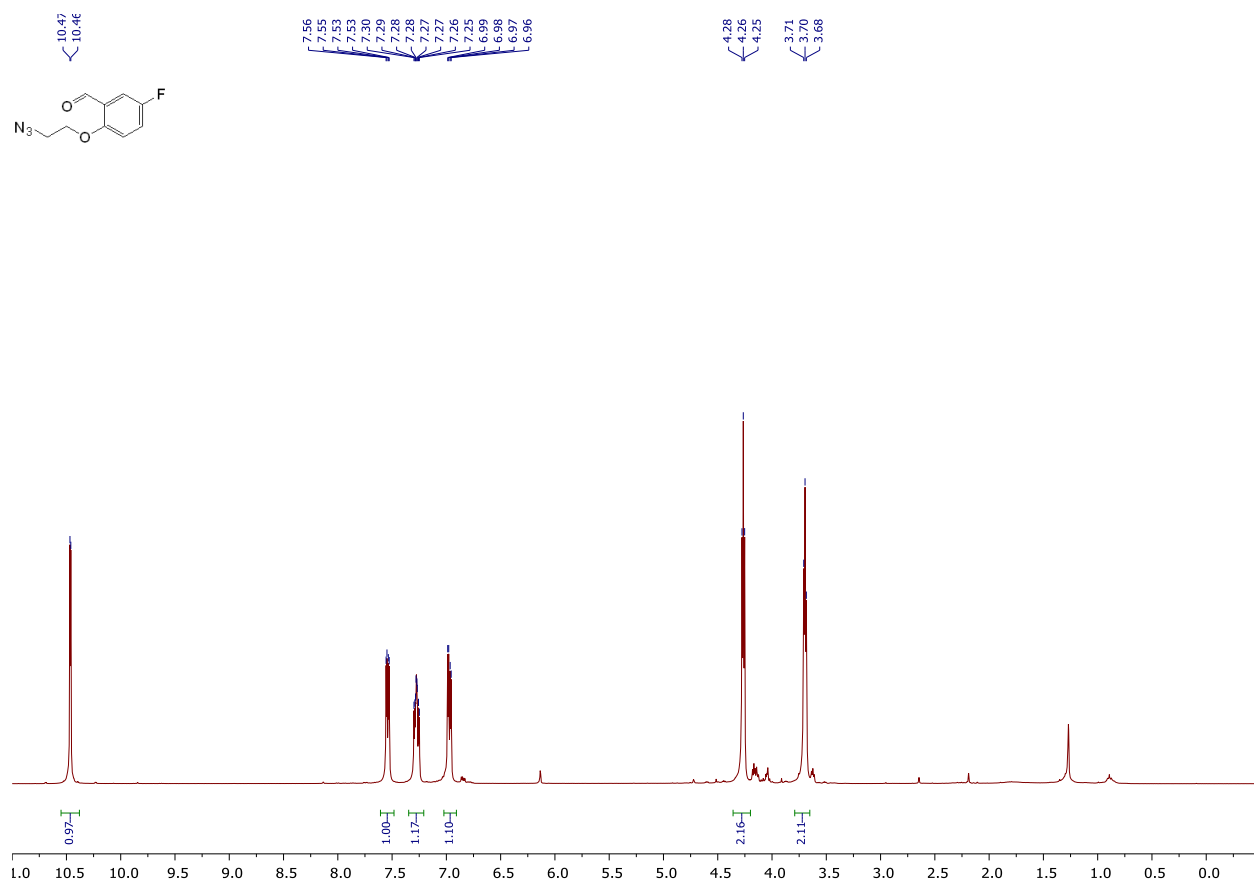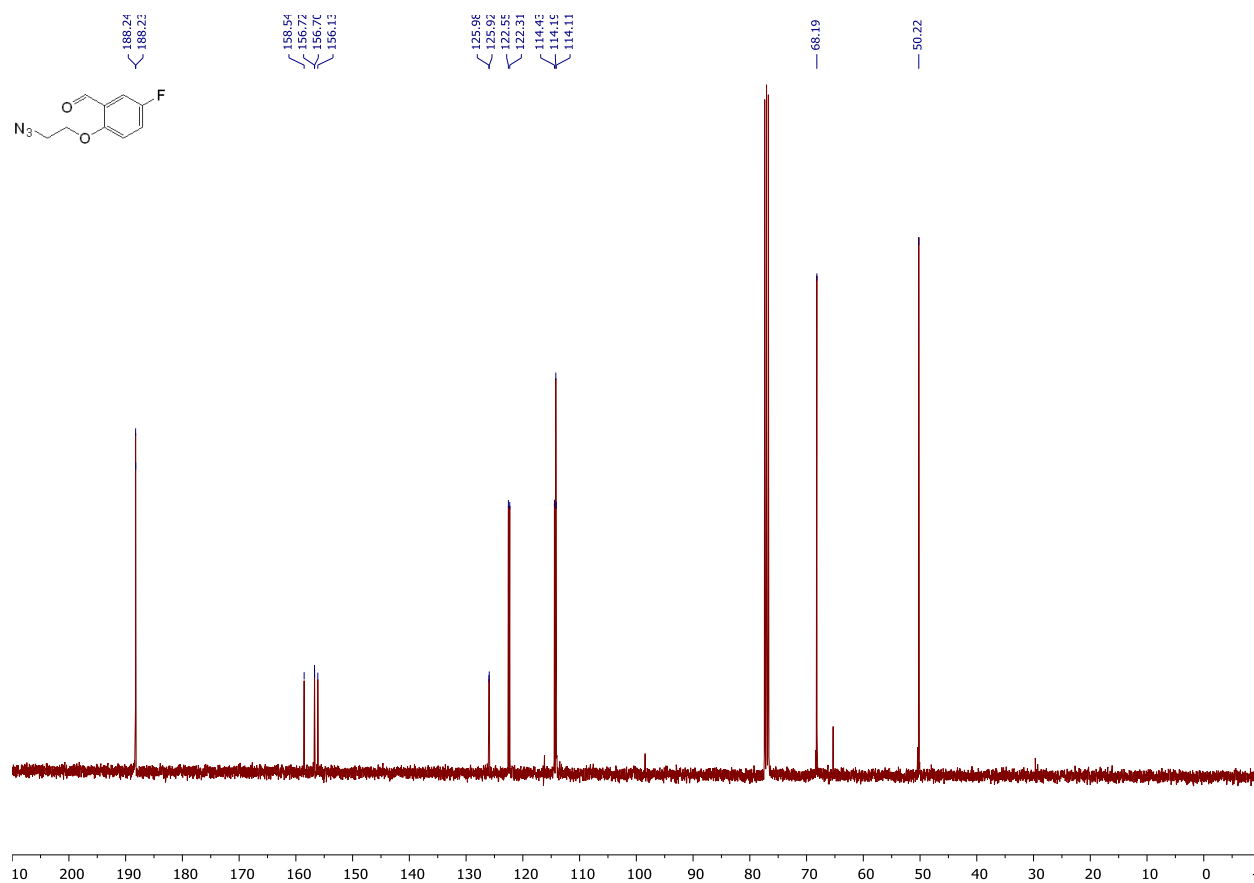

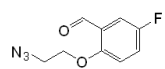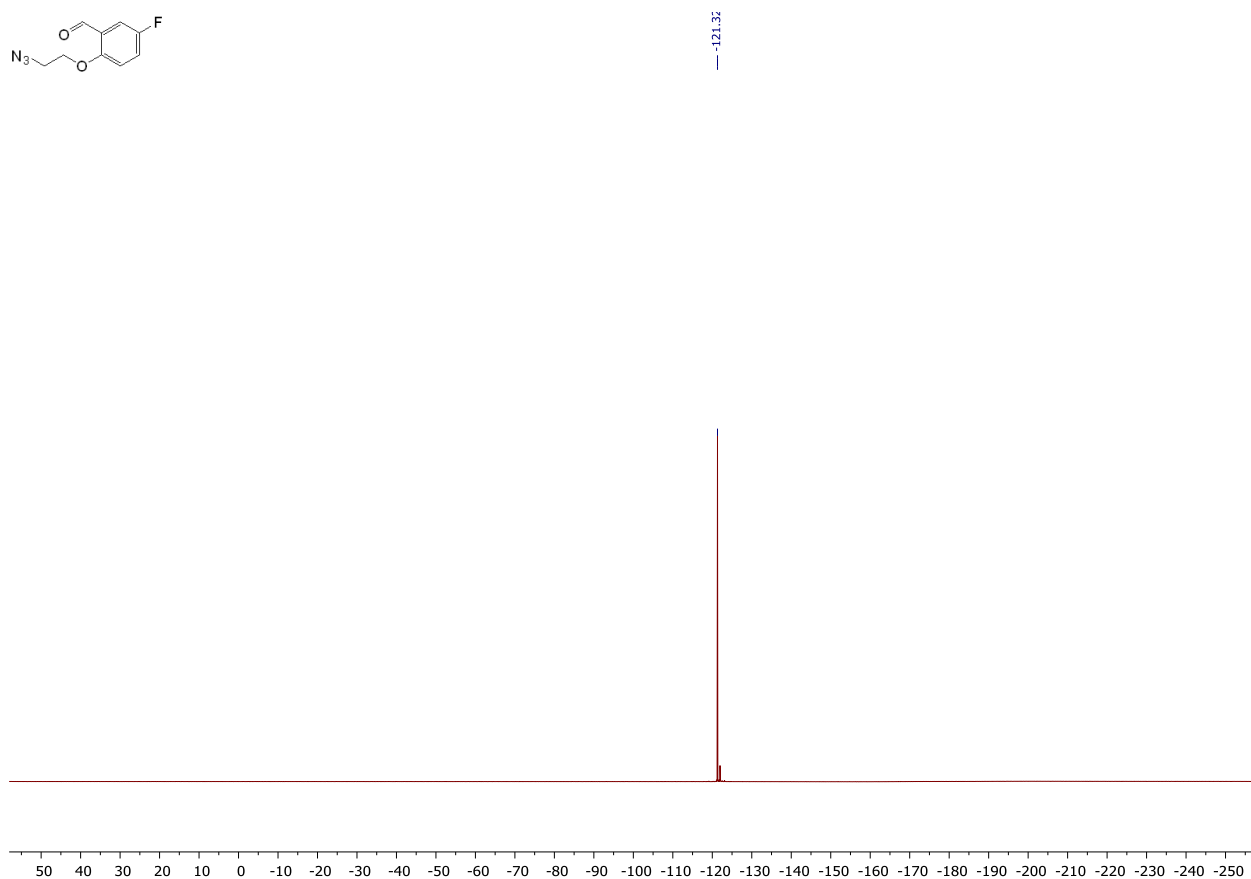

Copies of  $^1\text{H}$  400.13 MHz,  $\text{CDCl}_3$  and  $^{13}\text{C}$  100.61 MHz,  $\text{CDCl}_3$  spectra of **1c**

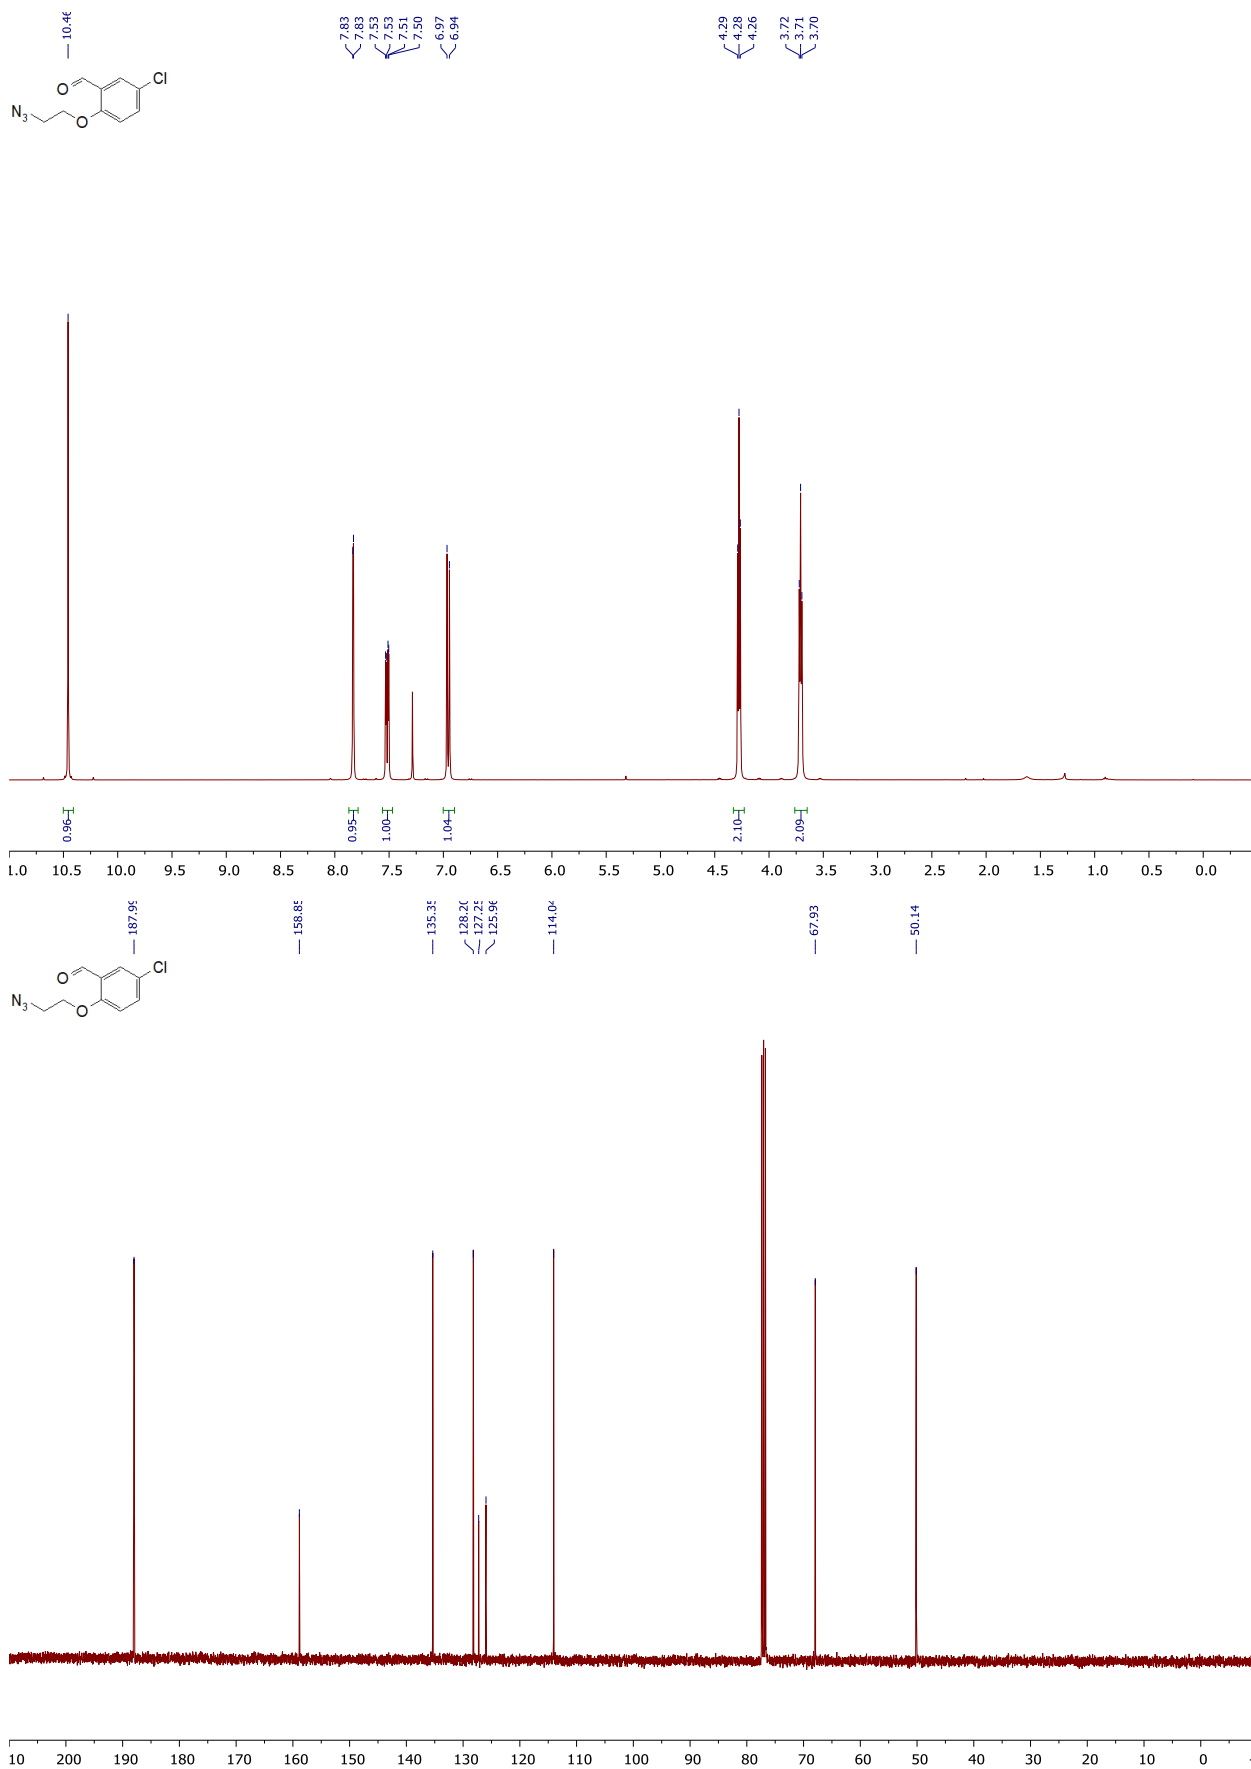

Copies of  $^1\text{H}$  400.13 MHz,  $\text{CDCl}_3$  and  $^{13}\text{C}$  100.61 MHz,  $\text{CDCl}_3$  spectra of **1d**

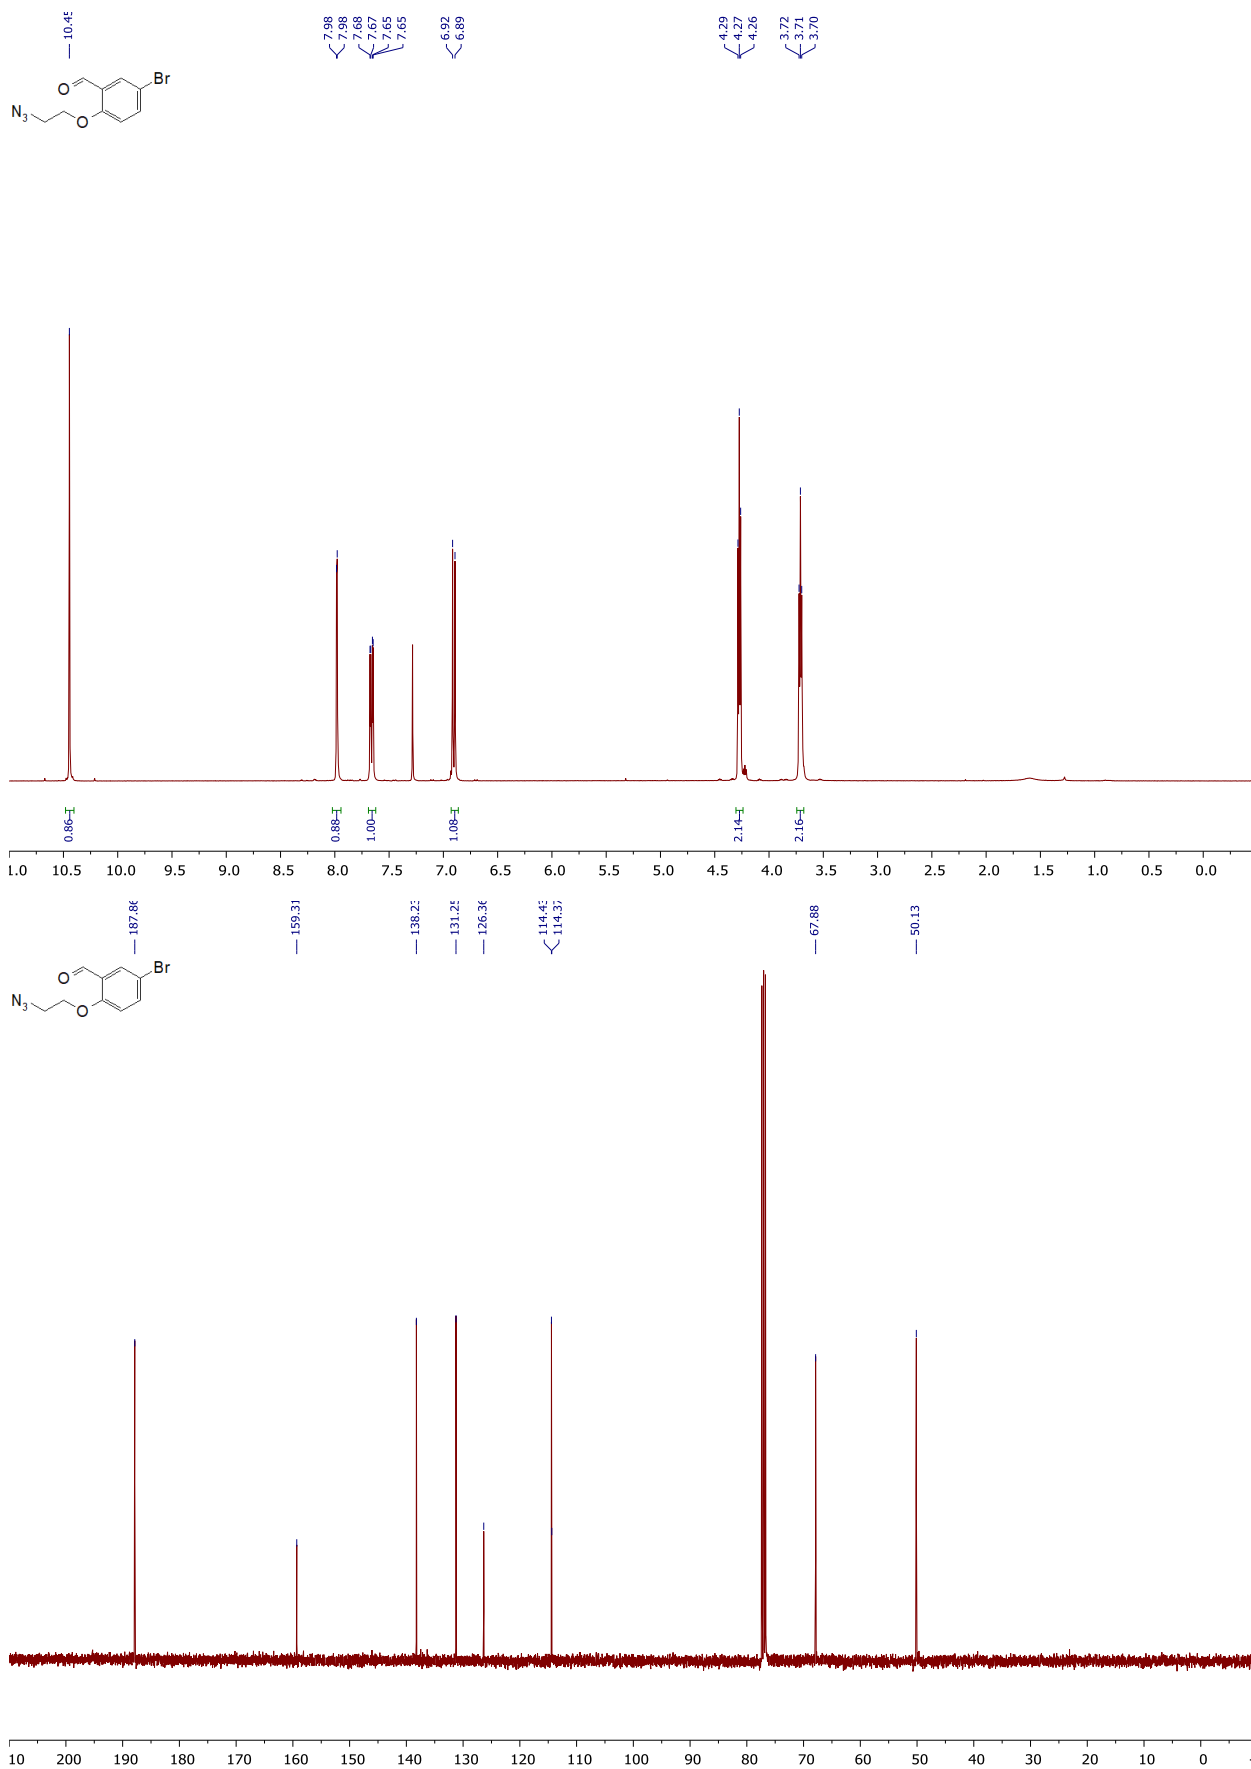

Copies of  $^1\text{H}$  400.13 MHz,  $\text{CDCl}_3$  and  $^{13}\text{C}$  100.61 MHz,  $\text{CDCl}_3$  spectra of **1e**

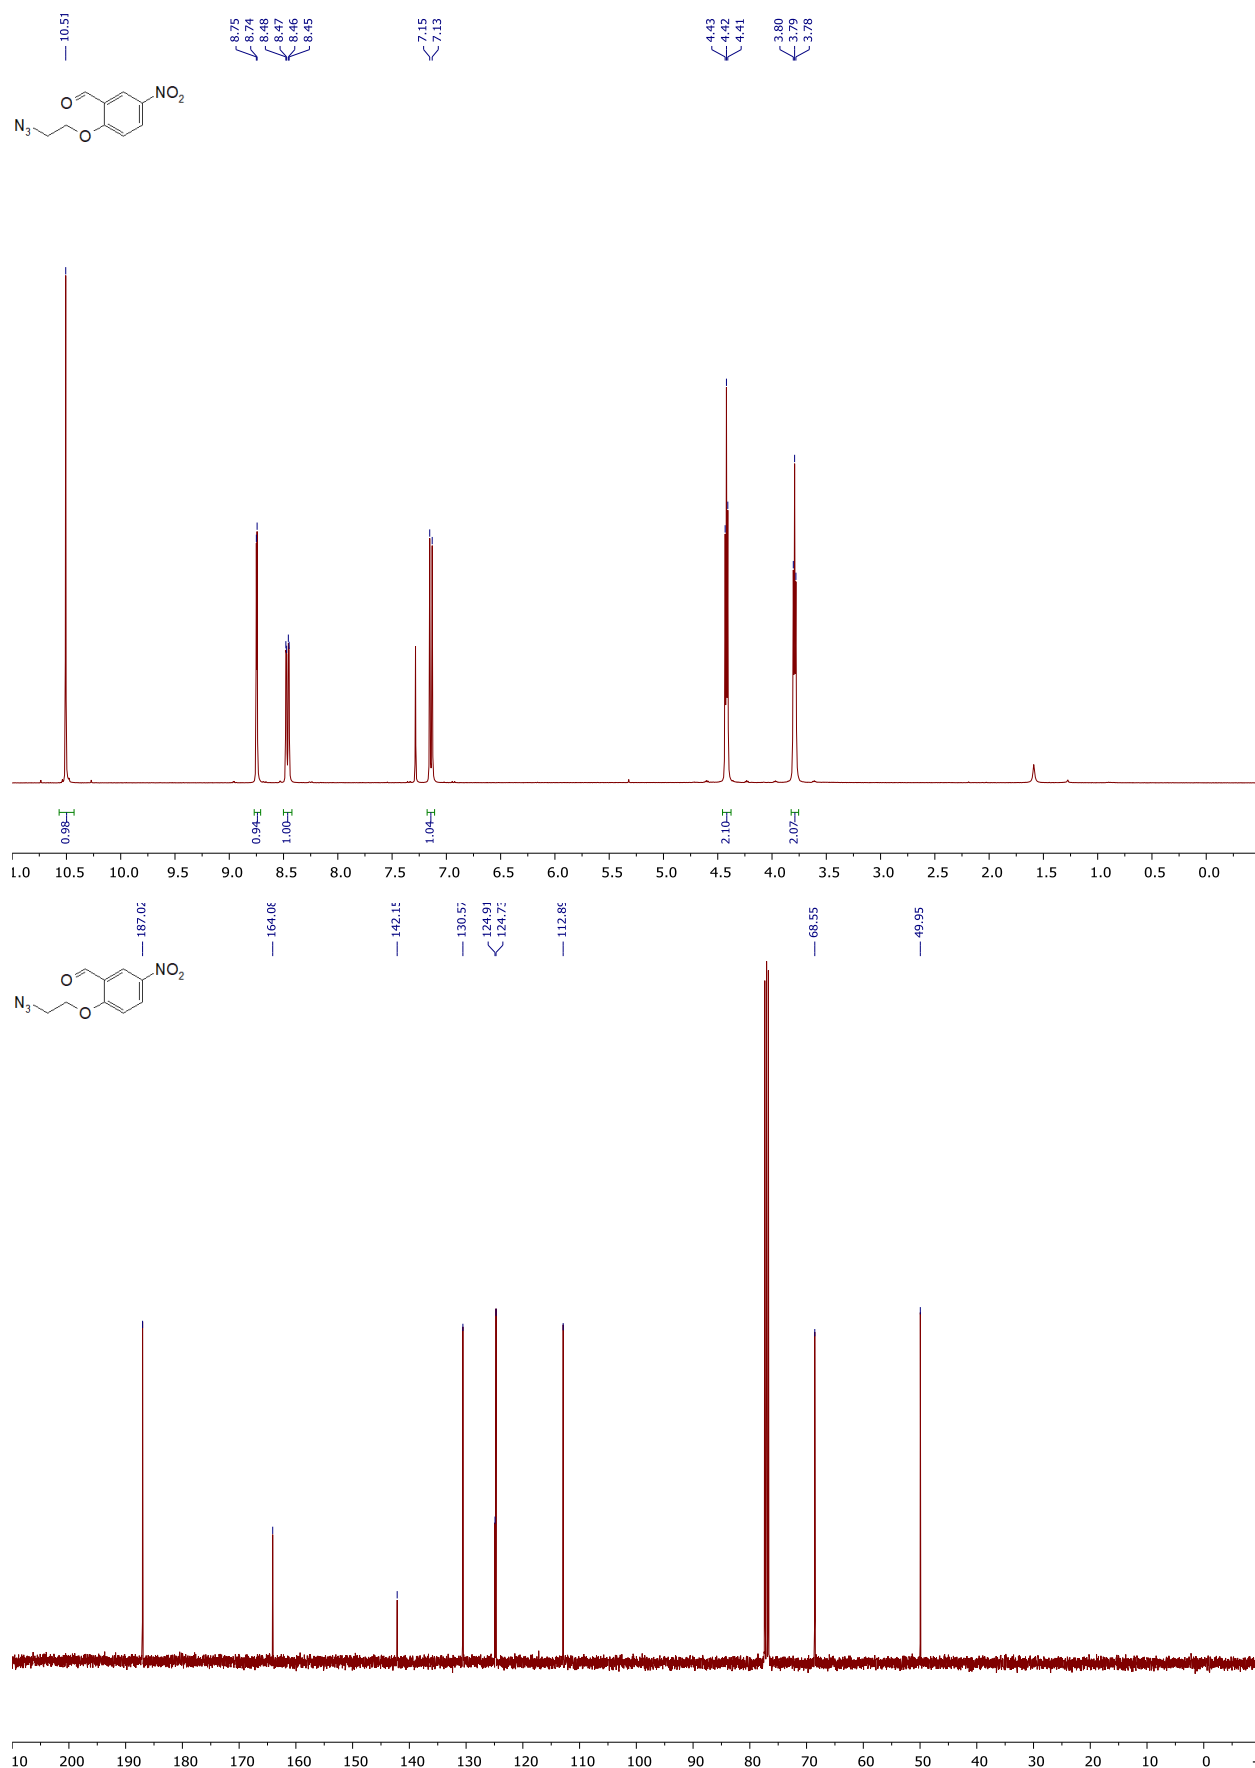



Copies of  $^1\text{H}$  400.13 MHz,  $\text{CDCl}_3$  and  $^{13}\text{C}$  100.61 MHz,  $\text{CDCl}_3$  spectra of **1f**

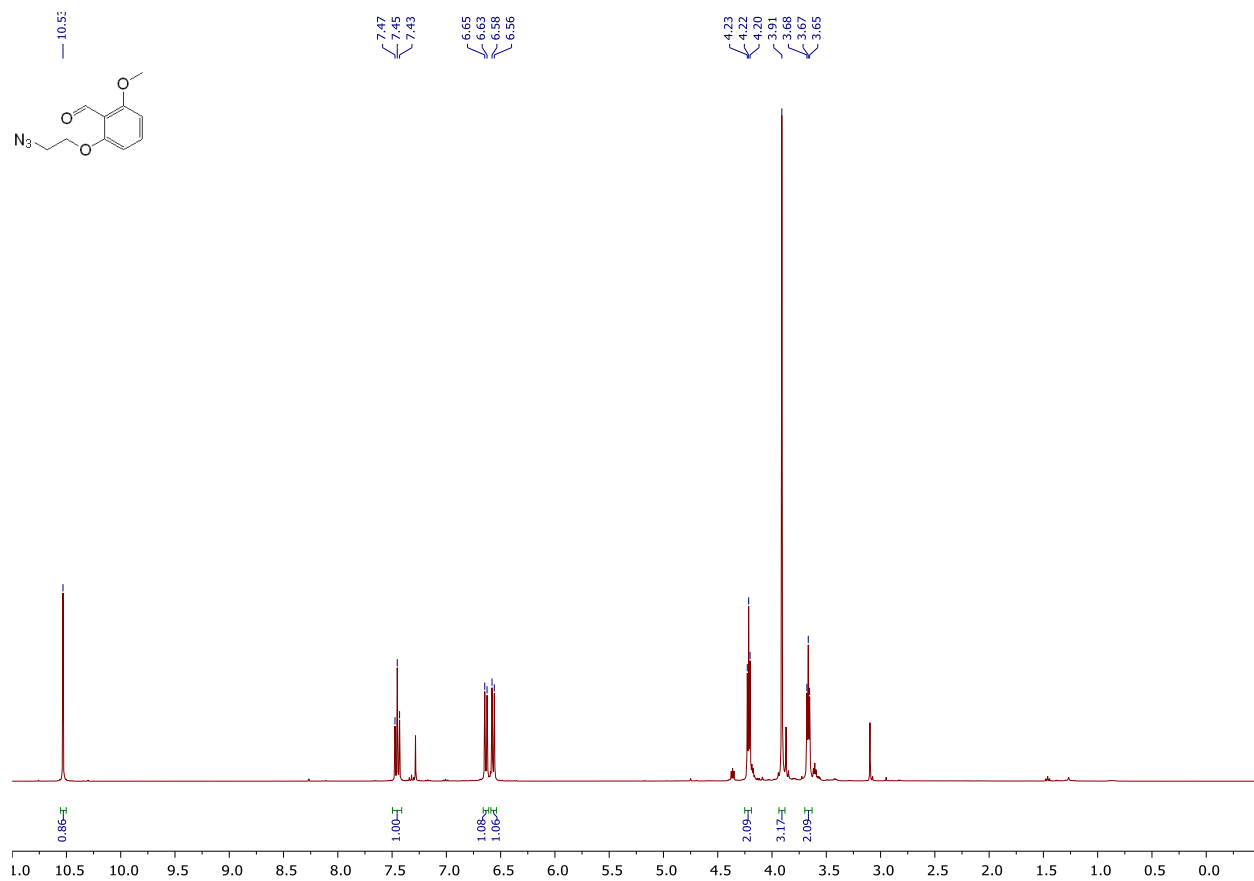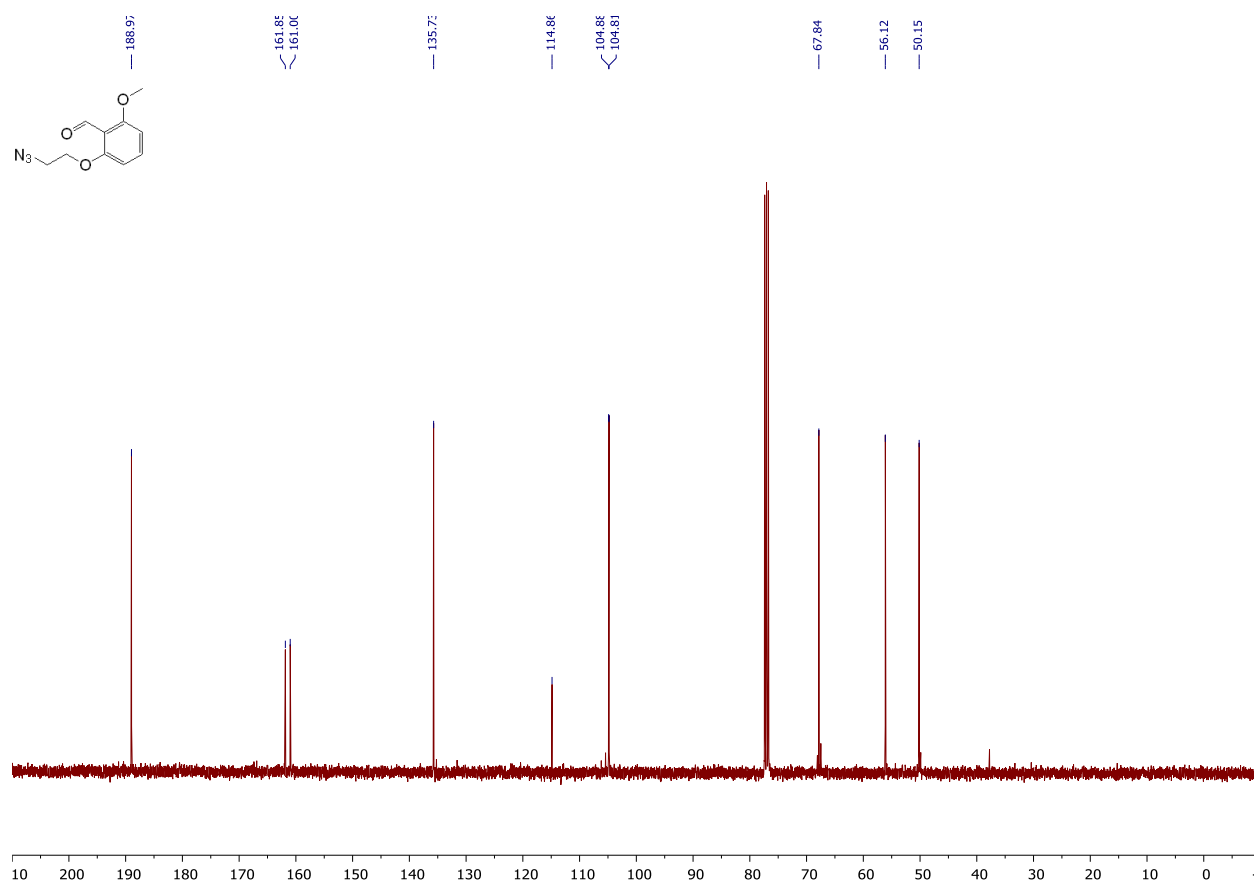

Copies of  $^1\text{H}$  400.13 MHz,  $\text{CDCl}_3$  and  $^{13}\text{C}$  100.61 MHz,  $\text{CDCl}_3$  spectra of **1g**

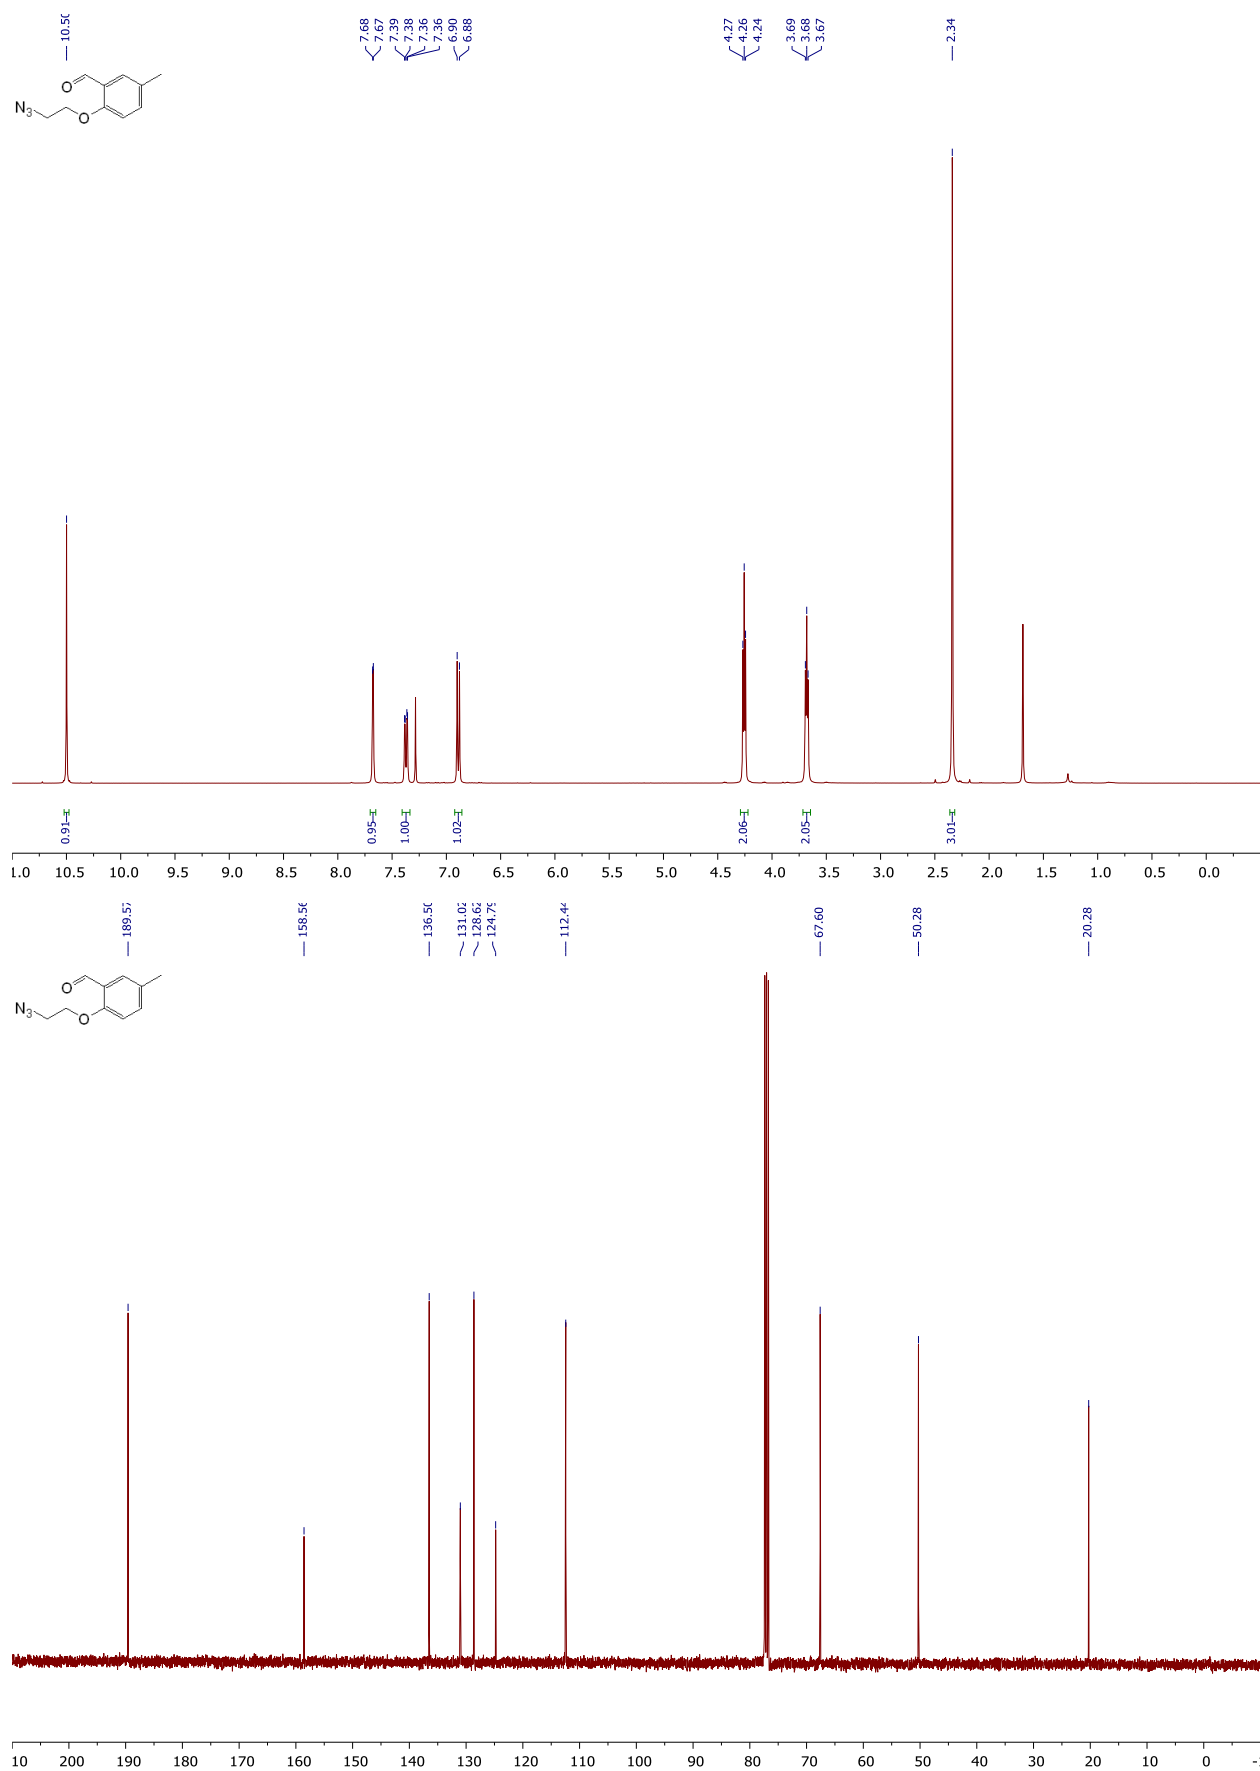

Copies of  $^1\text{H}$  400.13 MHz,  $\text{CDCl}_3$  and  $^{13}\text{C}$  100.61 MHz,  $\text{CDCl}_3$  spectra of **1h**

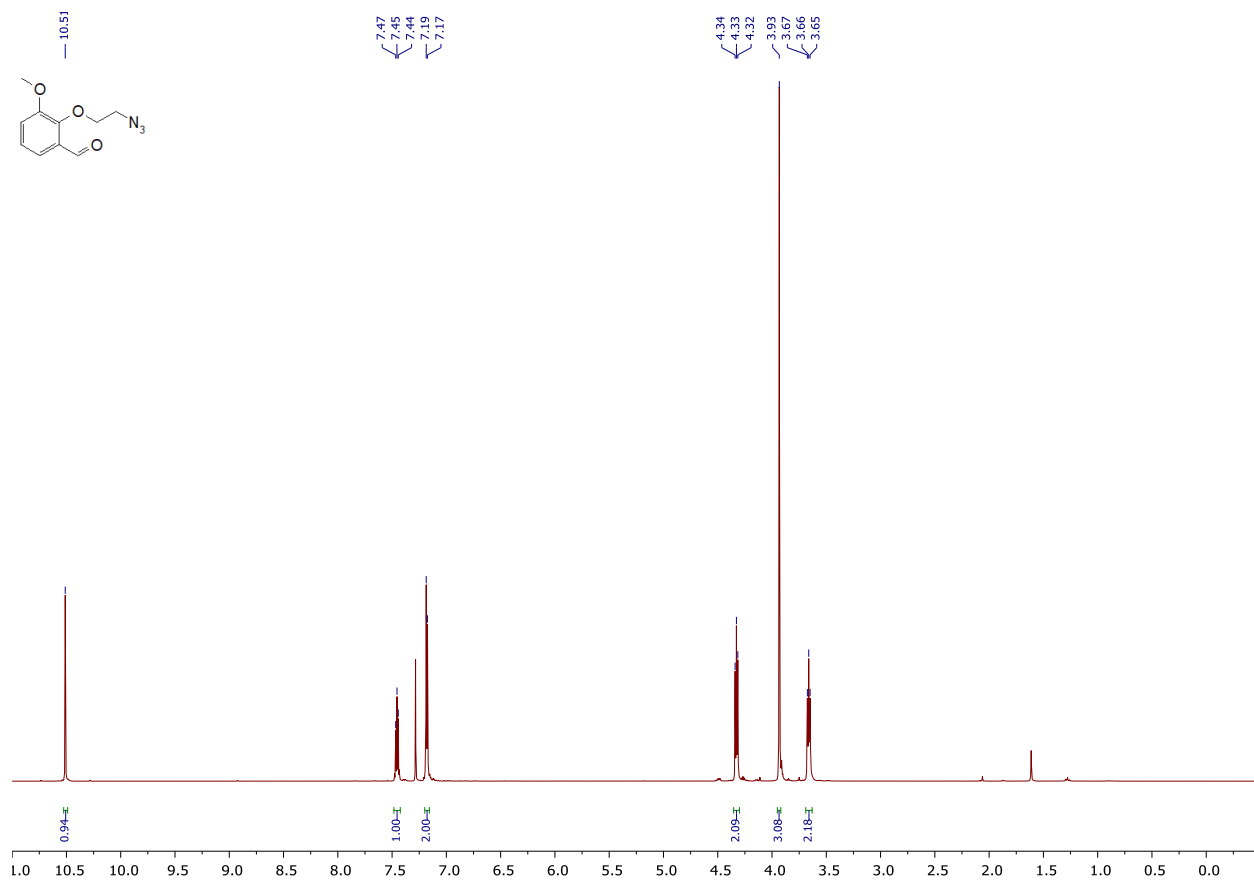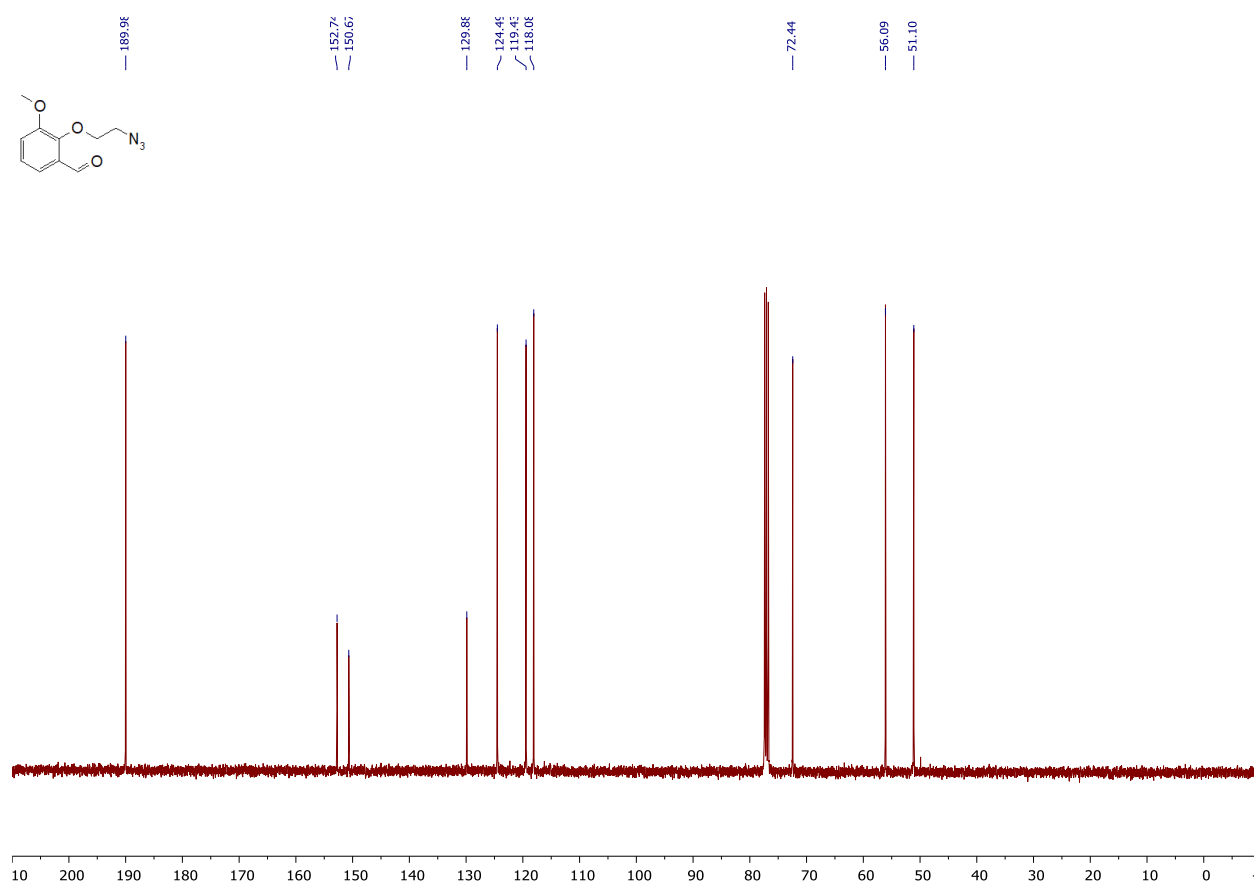

Copies of  $^1\text{H}$  400.13 MHz,  $\text{CDCl}_3$  and  $^{13}\text{C}$  100.61 MHz,  $\text{CDCl}_3$  spectra of **1i**

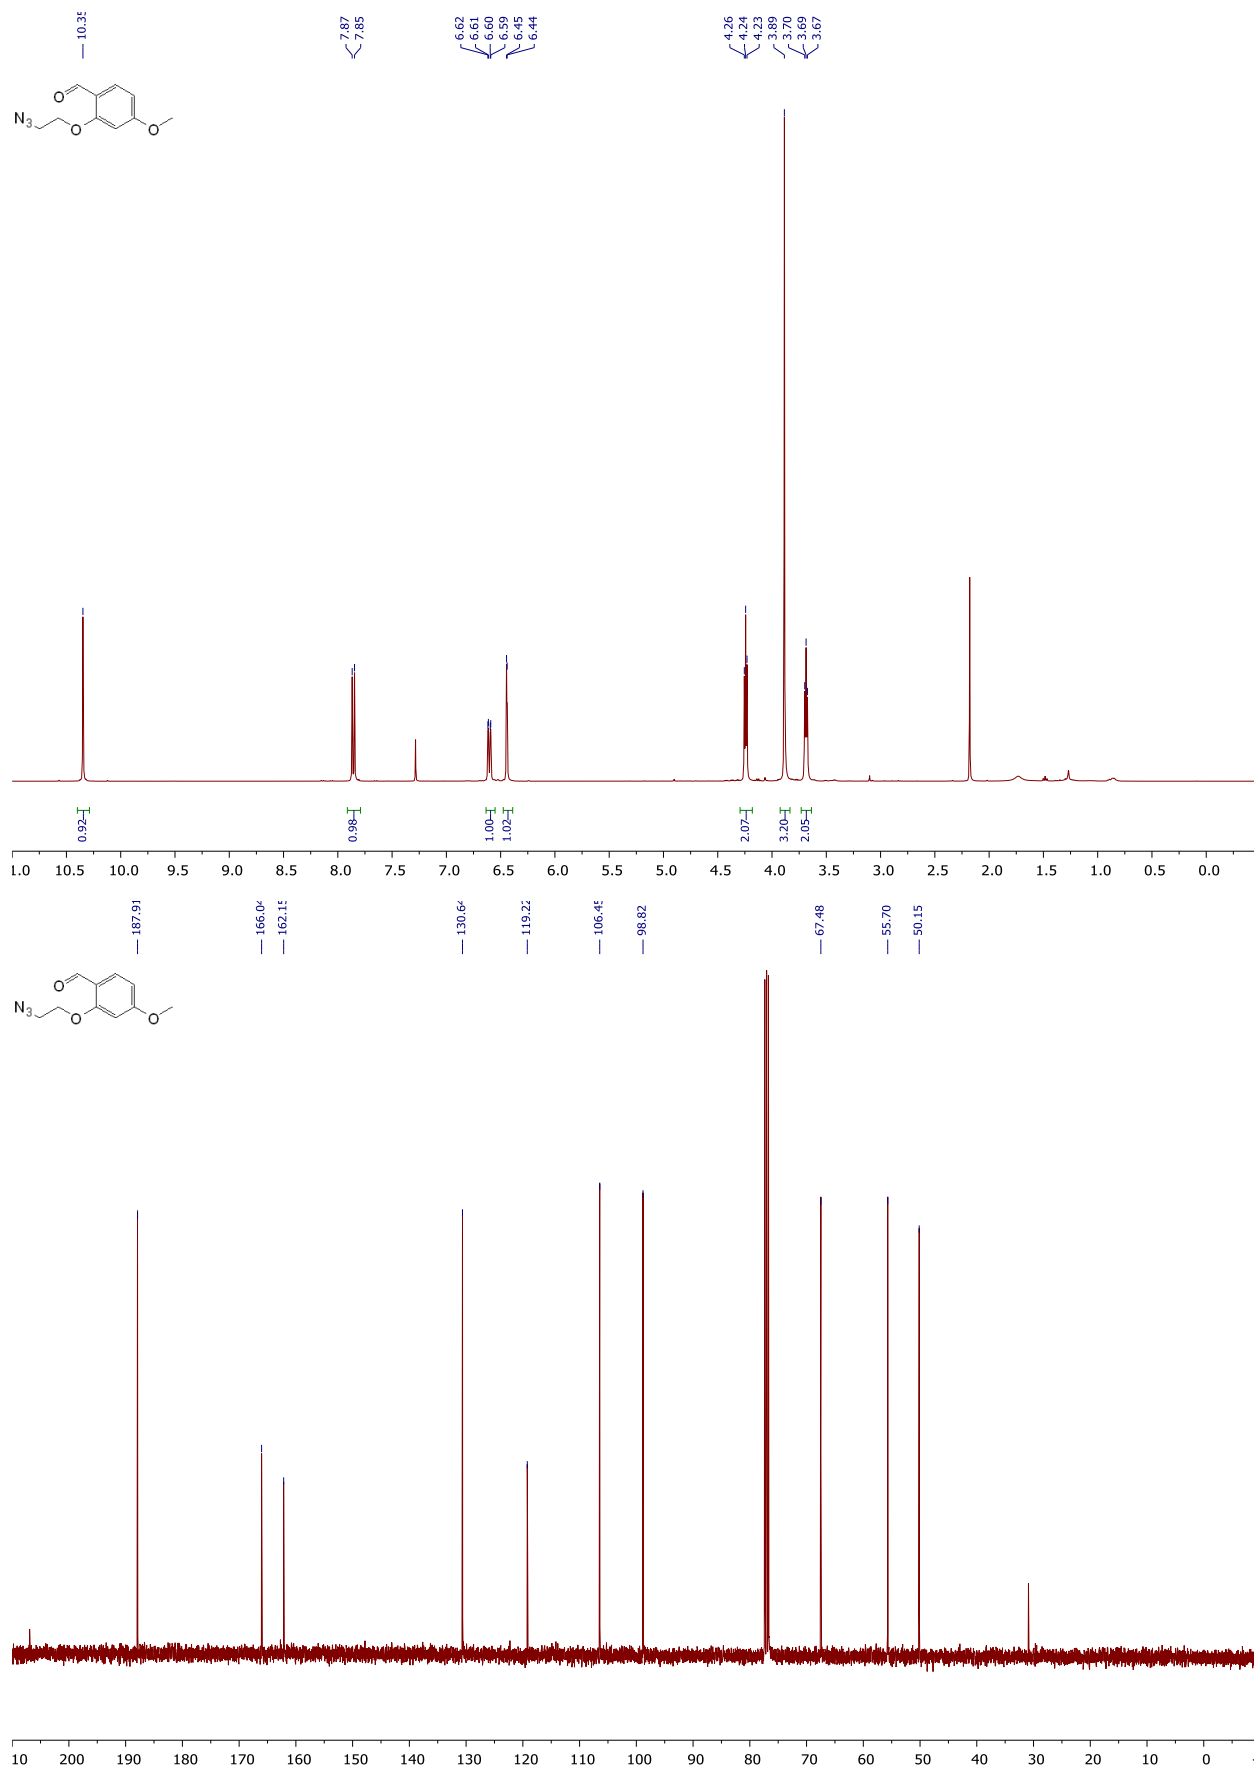

Copies of  $^1\text{H}$  400.13 MHz,  $\text{CDCl}_3$  and  $^{13}\text{C}$  100.61 MHz,  $\text{CDCl}_3$  spectra of **1j**

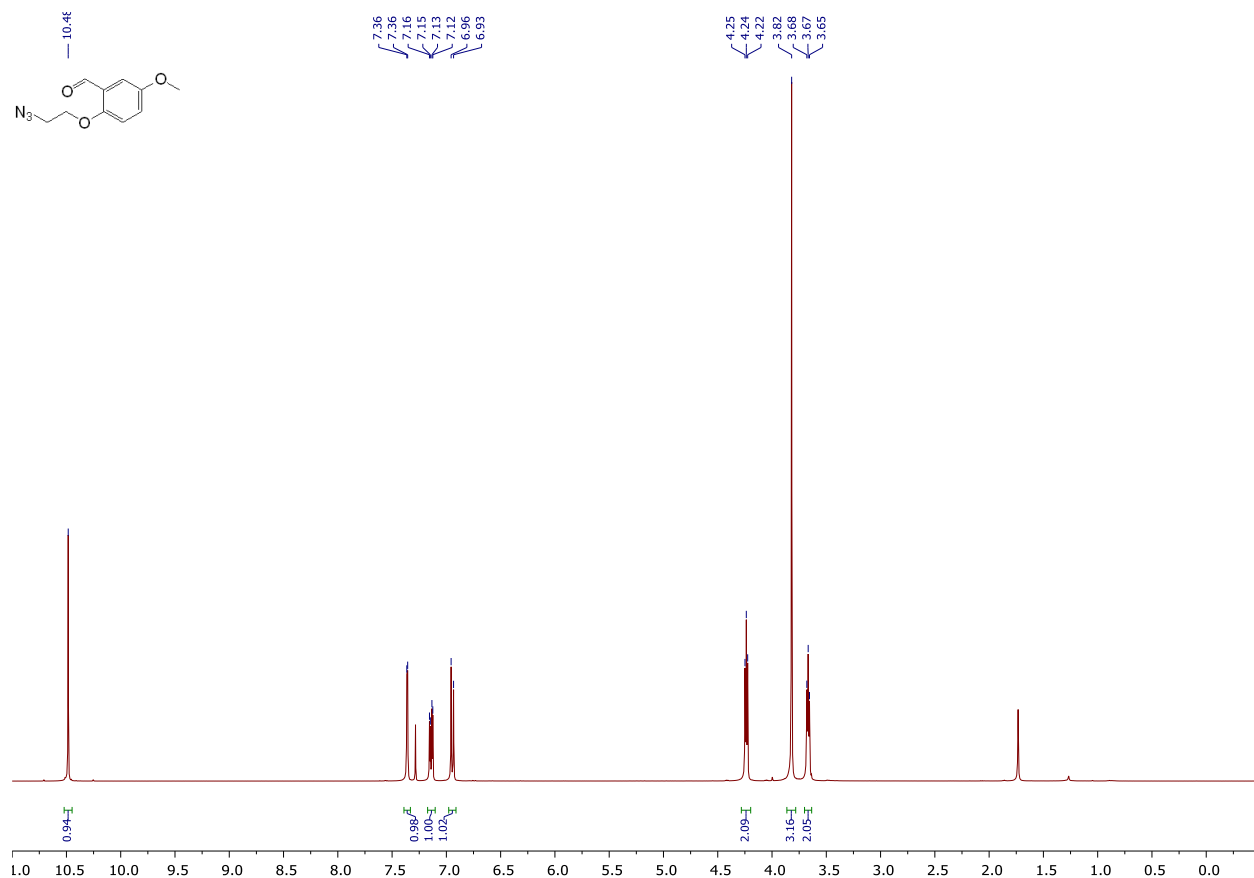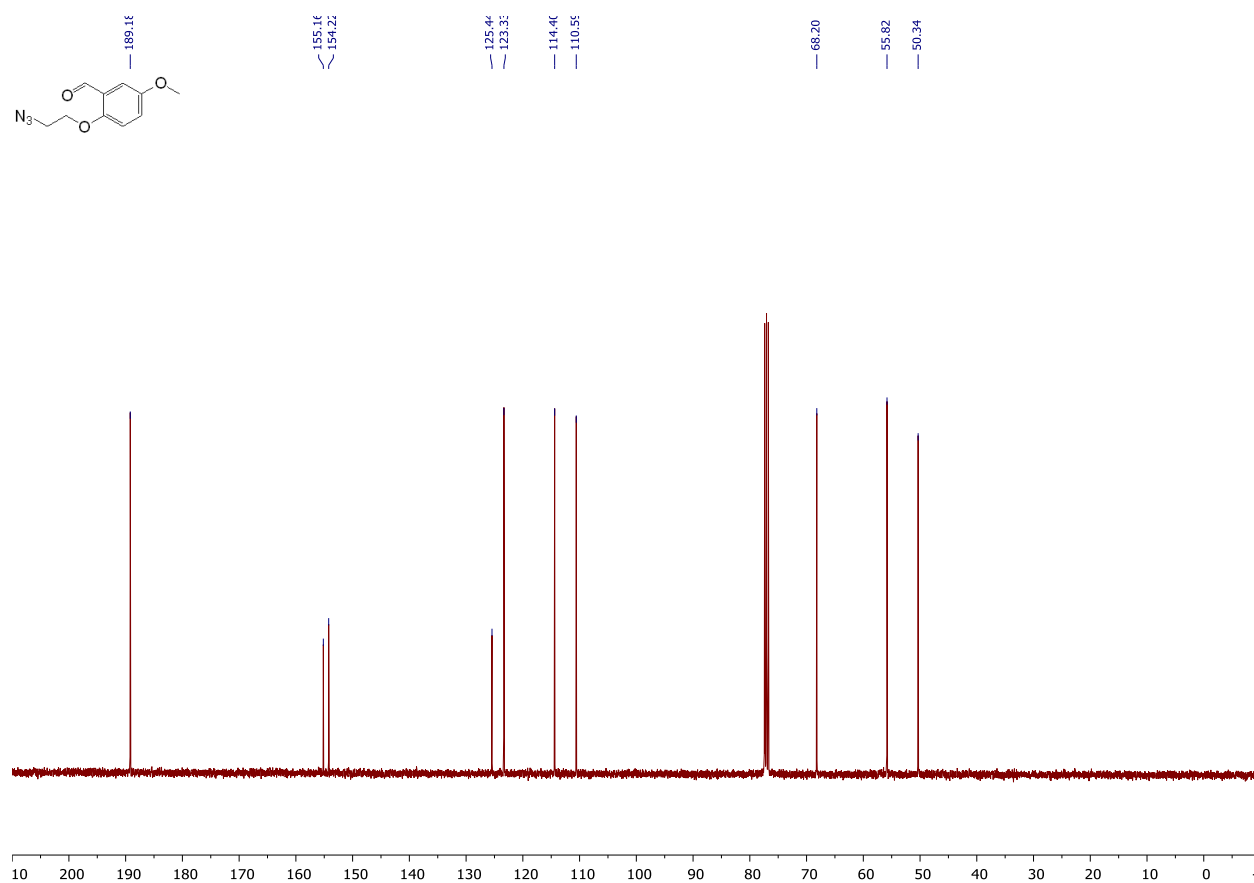

Copies of  $^1\text{H}$  400.13 MHz,  $\text{CDCl}_3$  and  $^{13}\text{C}$  100.61 MHz,  $\text{CDCl}_3$  spectra of **1k**

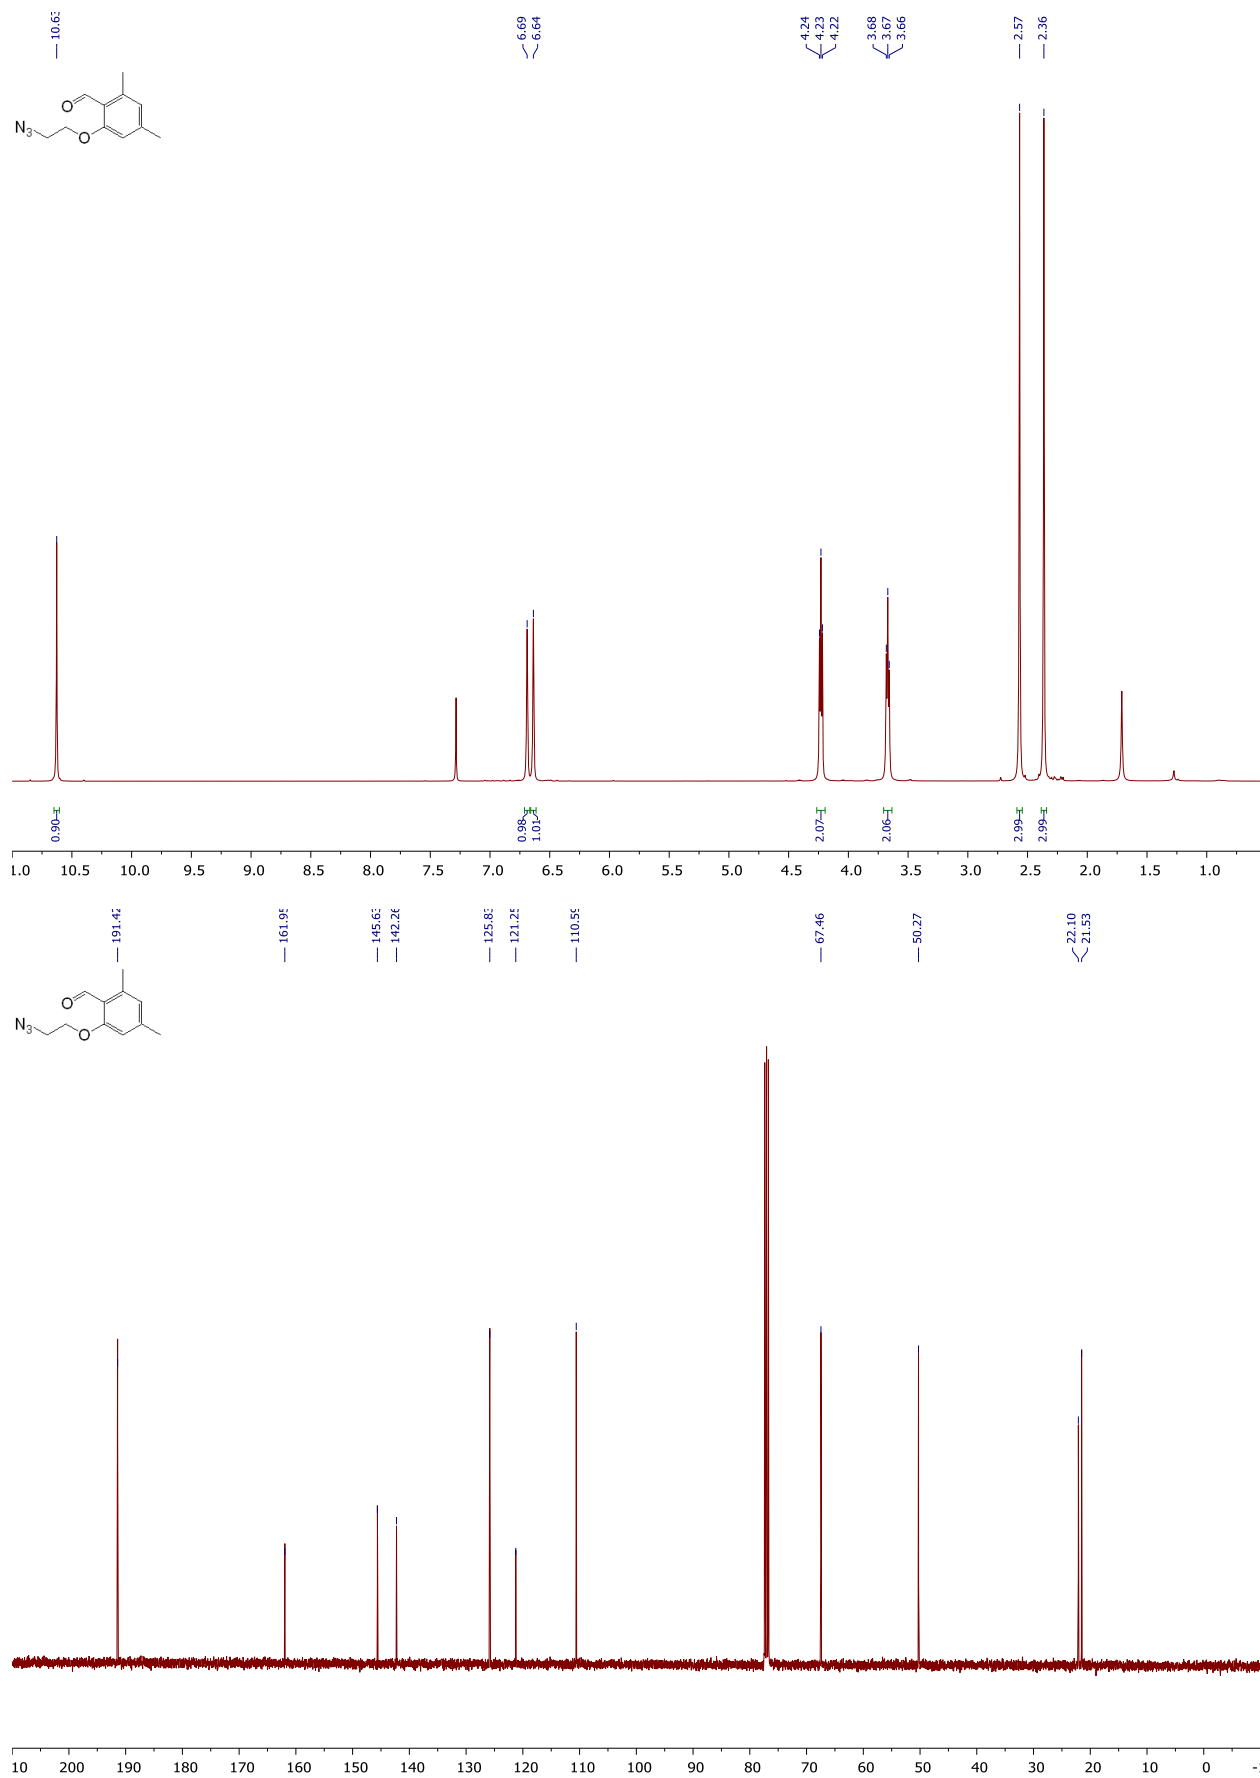

Copies of  $^1\text{H}$  400.13 MHz,  $\text{CDCl}_3$  and  $^{13}\text{C}$  100.61 MHz,  $\text{CDCl}_3$  spectra of **11**

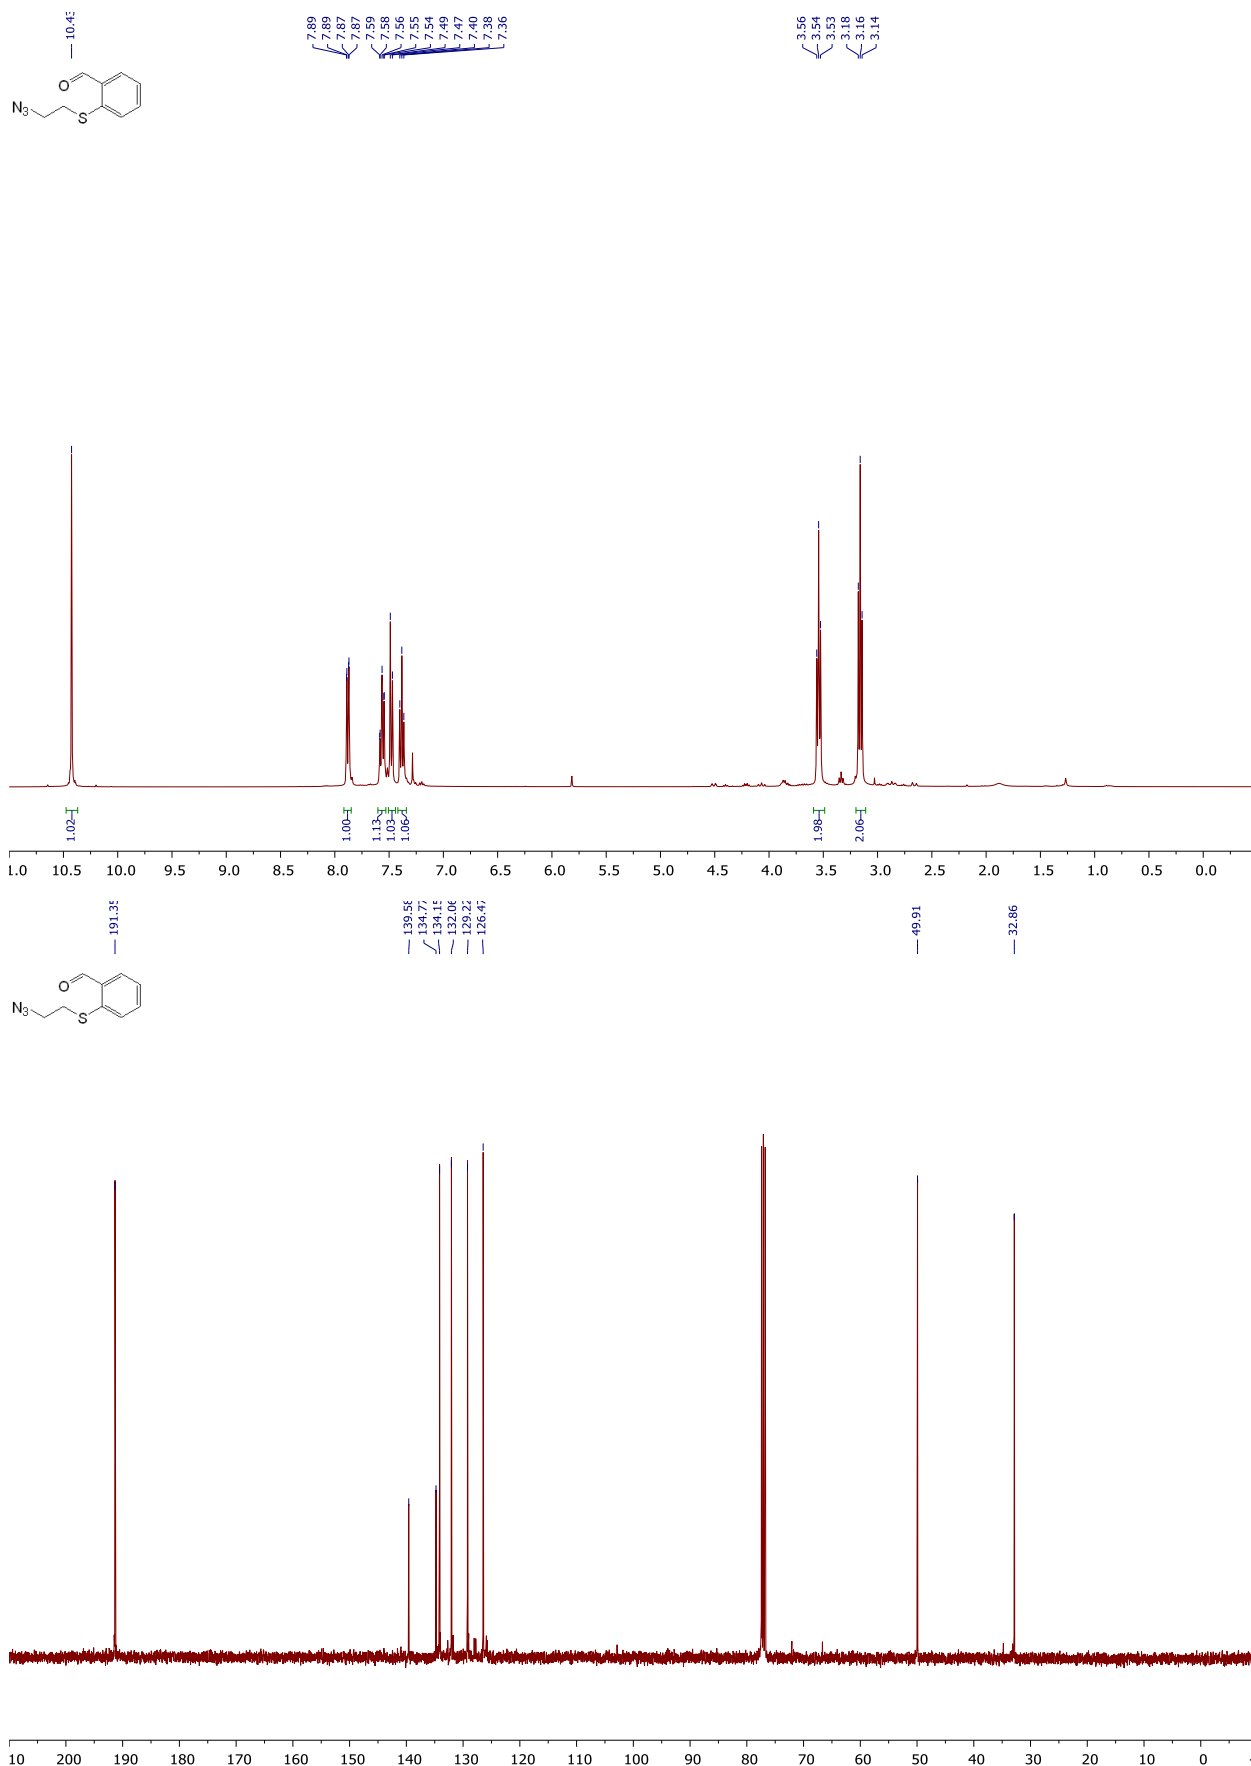

Copies of  $^1\text{H}$  400.13 MHz,  $\text{CDCl}_3$  and  $^{13}\text{C}$  100.61 MHz,  $\text{CDCl}_3$  spectra of **1m**

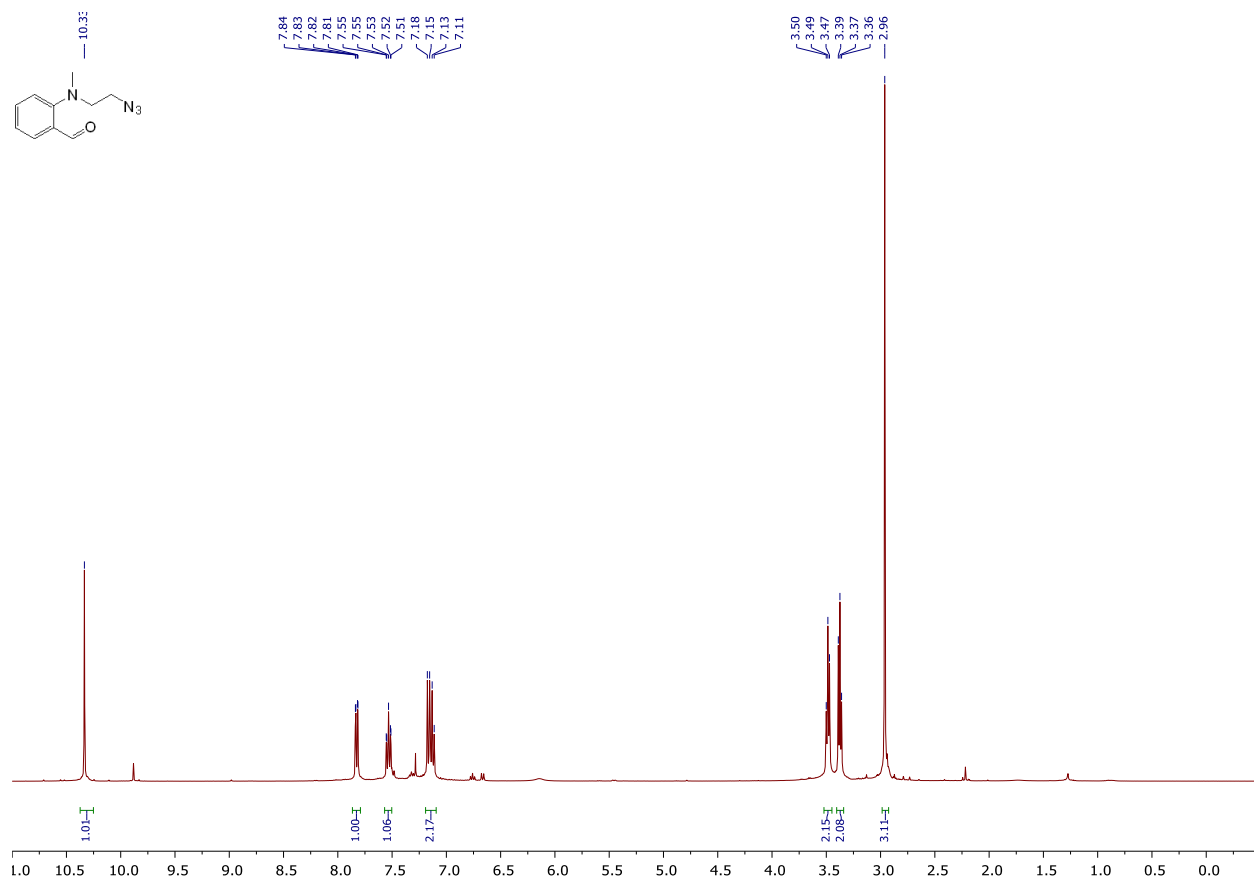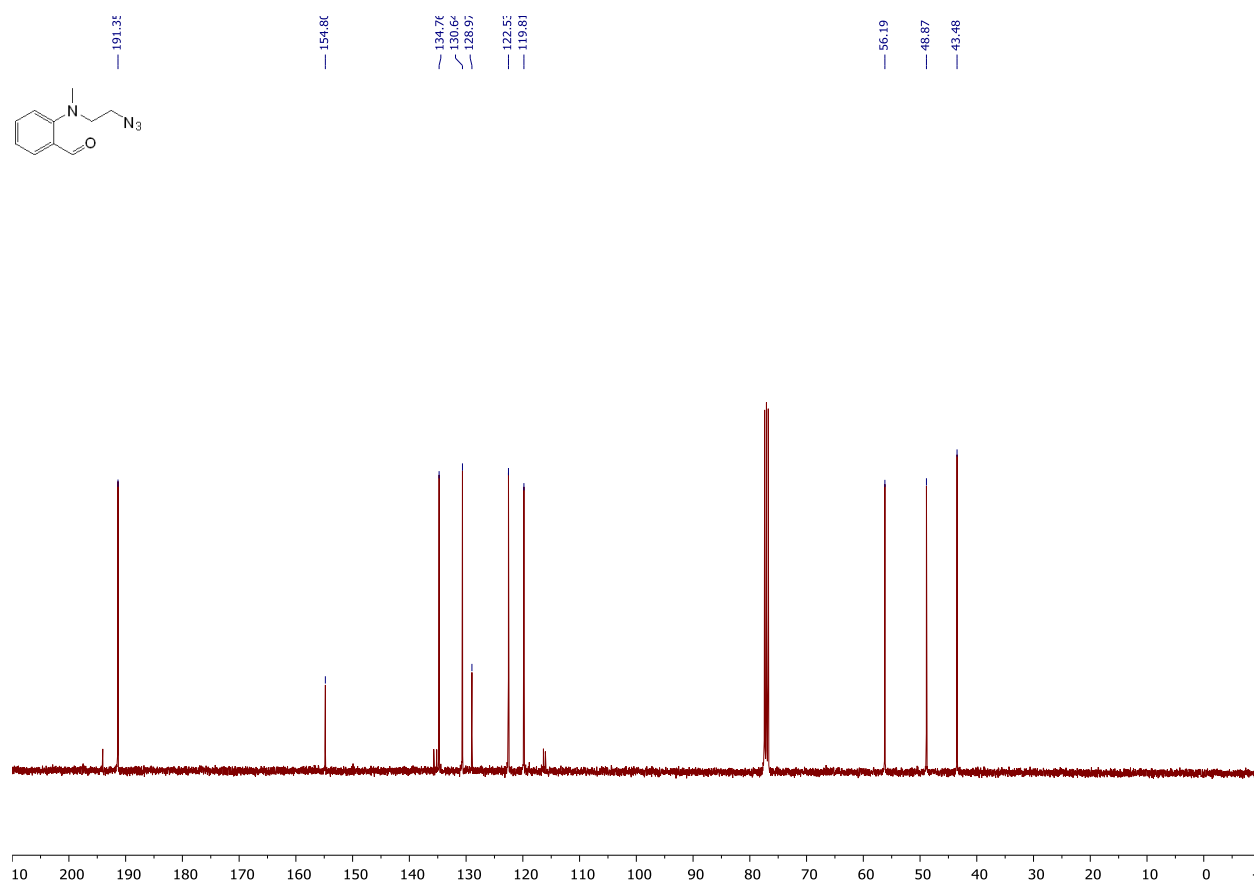



Copies of  $^1\text{H}$  400.13 MHz, DMSO- $d_6$  and  $^{13}\text{C}$  100.61 MHz, DMSO- $d_6$  spectra of **6a**

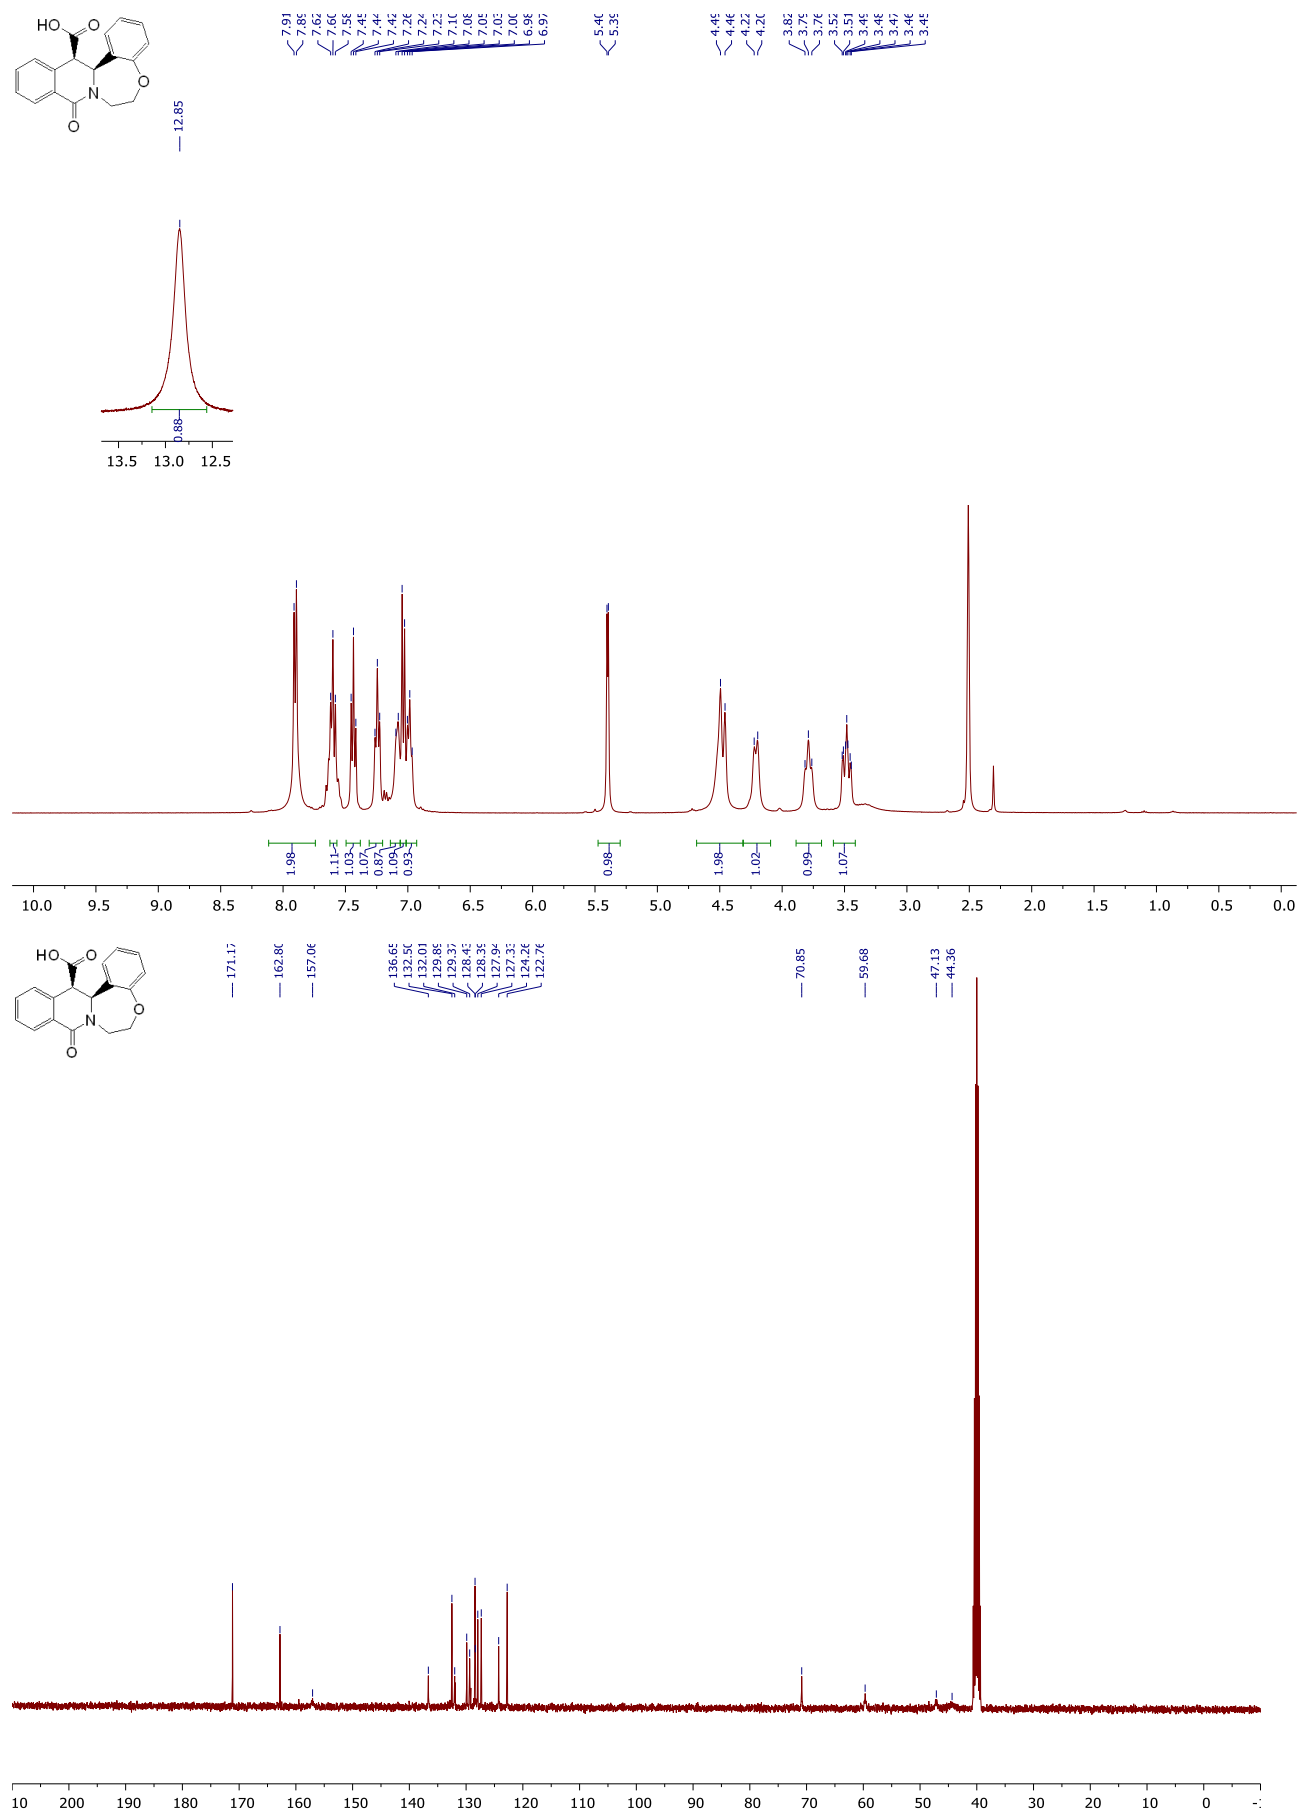

Copies of  $^1\text{H}$  400.13 MHz,  $\text{DMSO}-d_6$  and  $^{13}\text{C}$  100.61 MHz,  $\text{DMSO}-d_6$  spectra of **6a'**

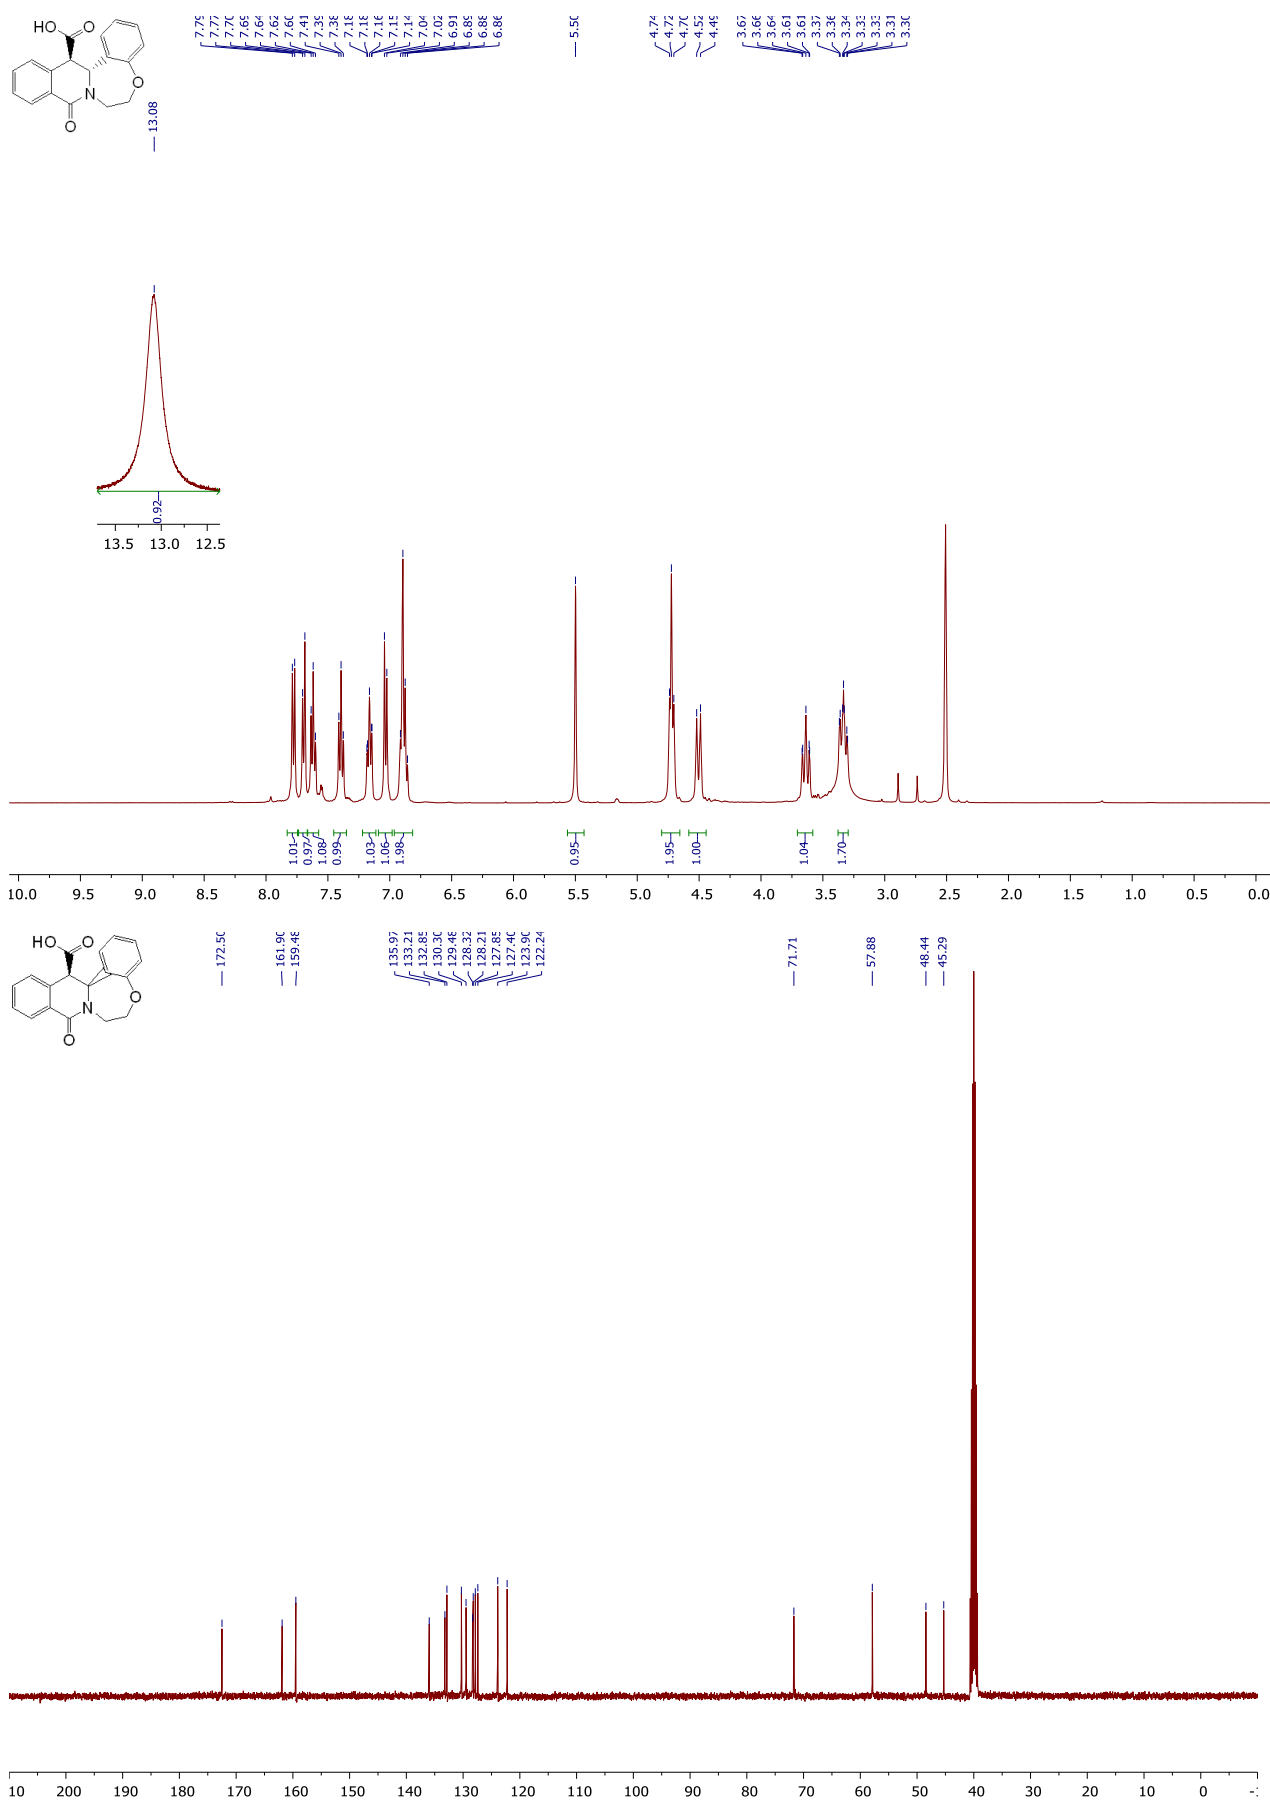

Copies of  $^1\text{H}$  400.13 MHz,  $\text{CDCl}_3$ ,  $^{13}\text{C}$  100.61 MHz,  $\text{CDCl}_3$  and  $^{19}\text{F}$  376.50 MHz,  $\text{CDCl}_3$  spectra of **6b**

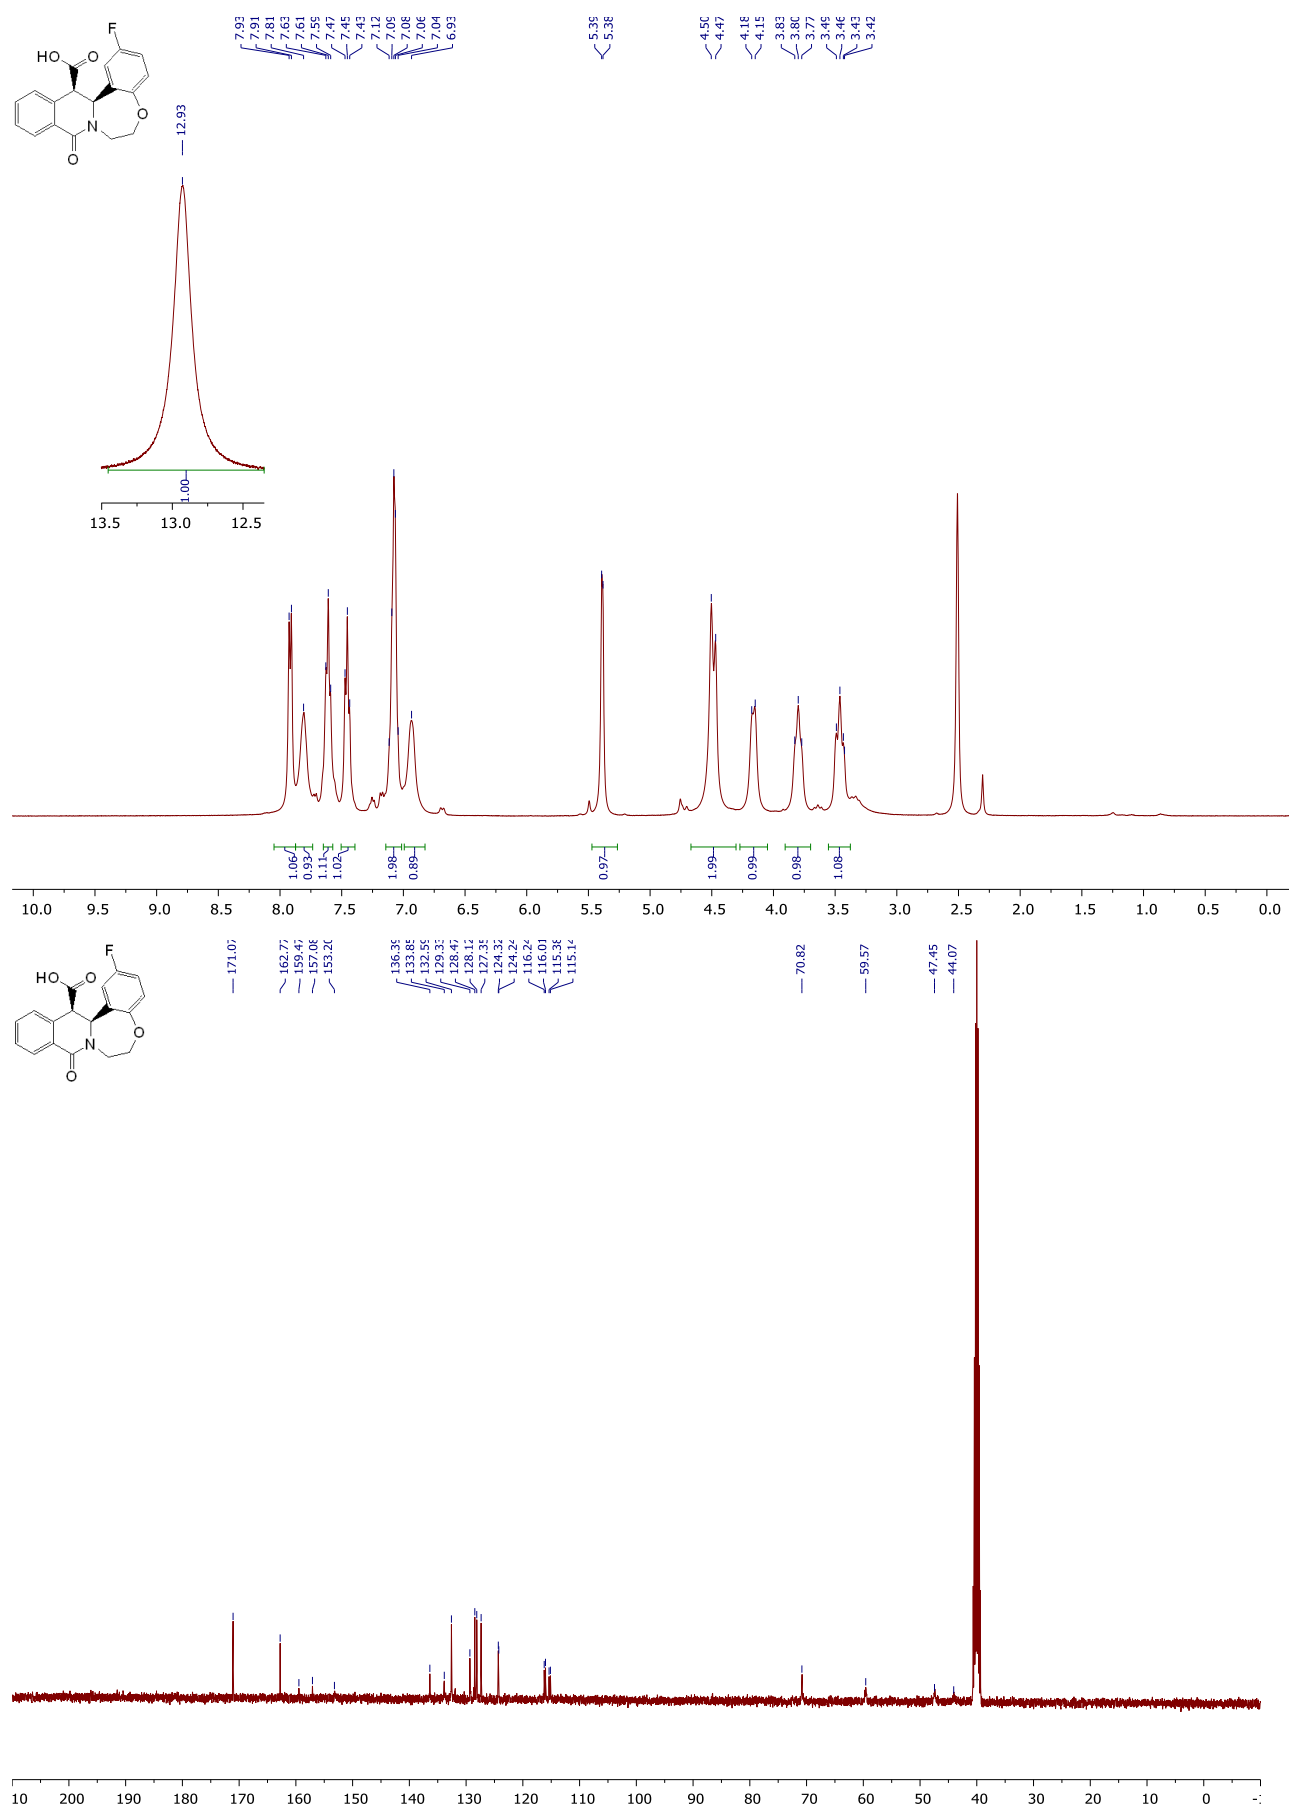

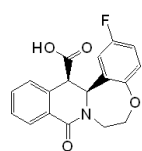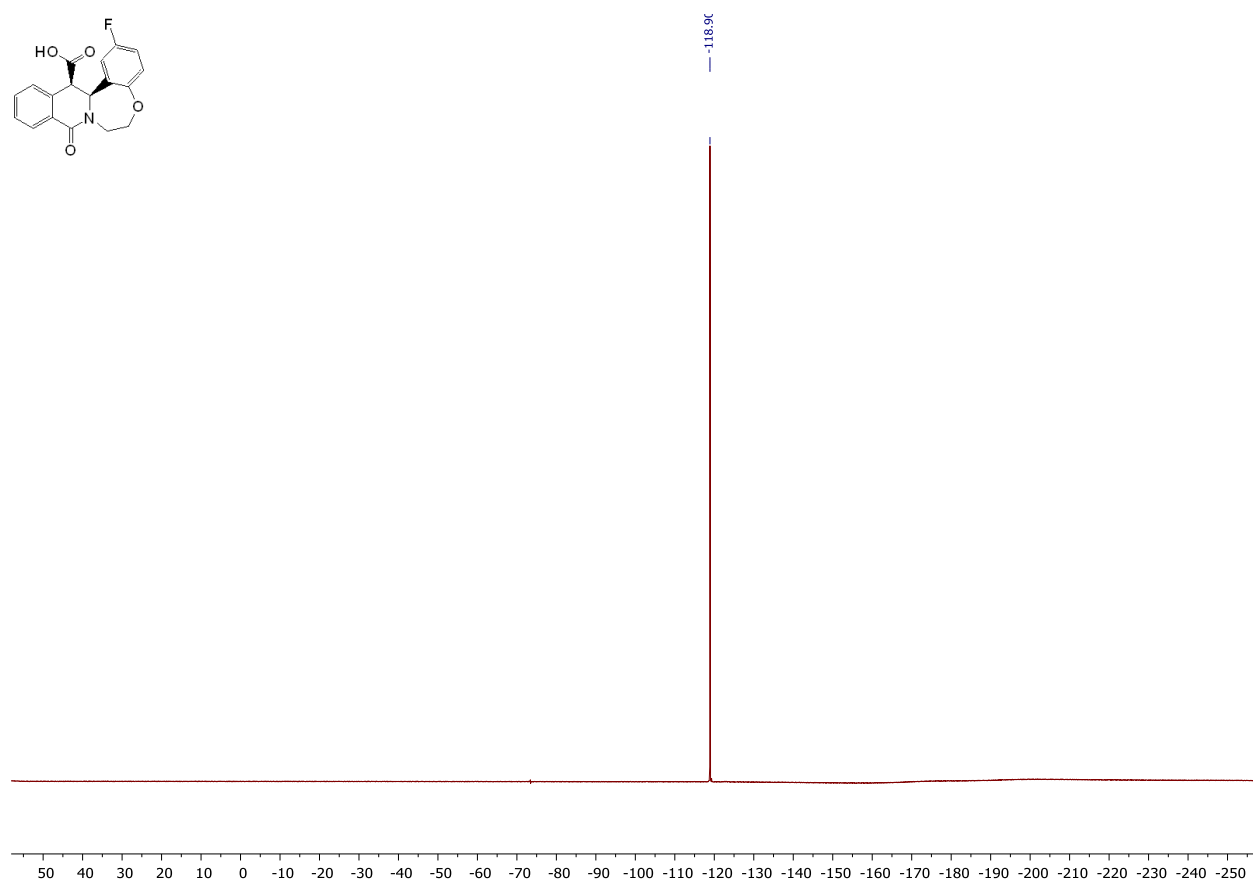

The figure displays the  $^1\text{H}$  and  $^{13}\text{C}$  NMR spectra of compound 10, along with its chemical structure.

**Chemical Structure:** The structure of compound 10 is shown, featuring a benzodioxane core with a chlorine substituent and a carboxylic acid group.

**$^1\text{H}$  NMR Spectrum (Top):** The  $^1\text{H}$  NMR spectrum (400 MHz,  $\text{CDCl}_3$ ) shows peaks in the aromatic region (7.05–7.91 ppm) and aliphatic region (3.41–5.38 ppm). Integration values are provided below the peaks.

**$^{13}\text{C}$  NMR Spectrum (Bottom):** The  $^{13}\text{C}$  NMR spectrum (100 MHz,  $\text{CDCl}_3$ ) shows peaks in the aromatic region (124.71–136.44 ppm) and aliphatic region (43.52–70.80 ppm).

Copies of  $^1\text{H}$  400.13 MHz,  $\text{DMSO}-d_6$  and  $^{13}\text{C}$  100.61 MHz,  $\text{DMSO}-d_6$  spectra of **6d**

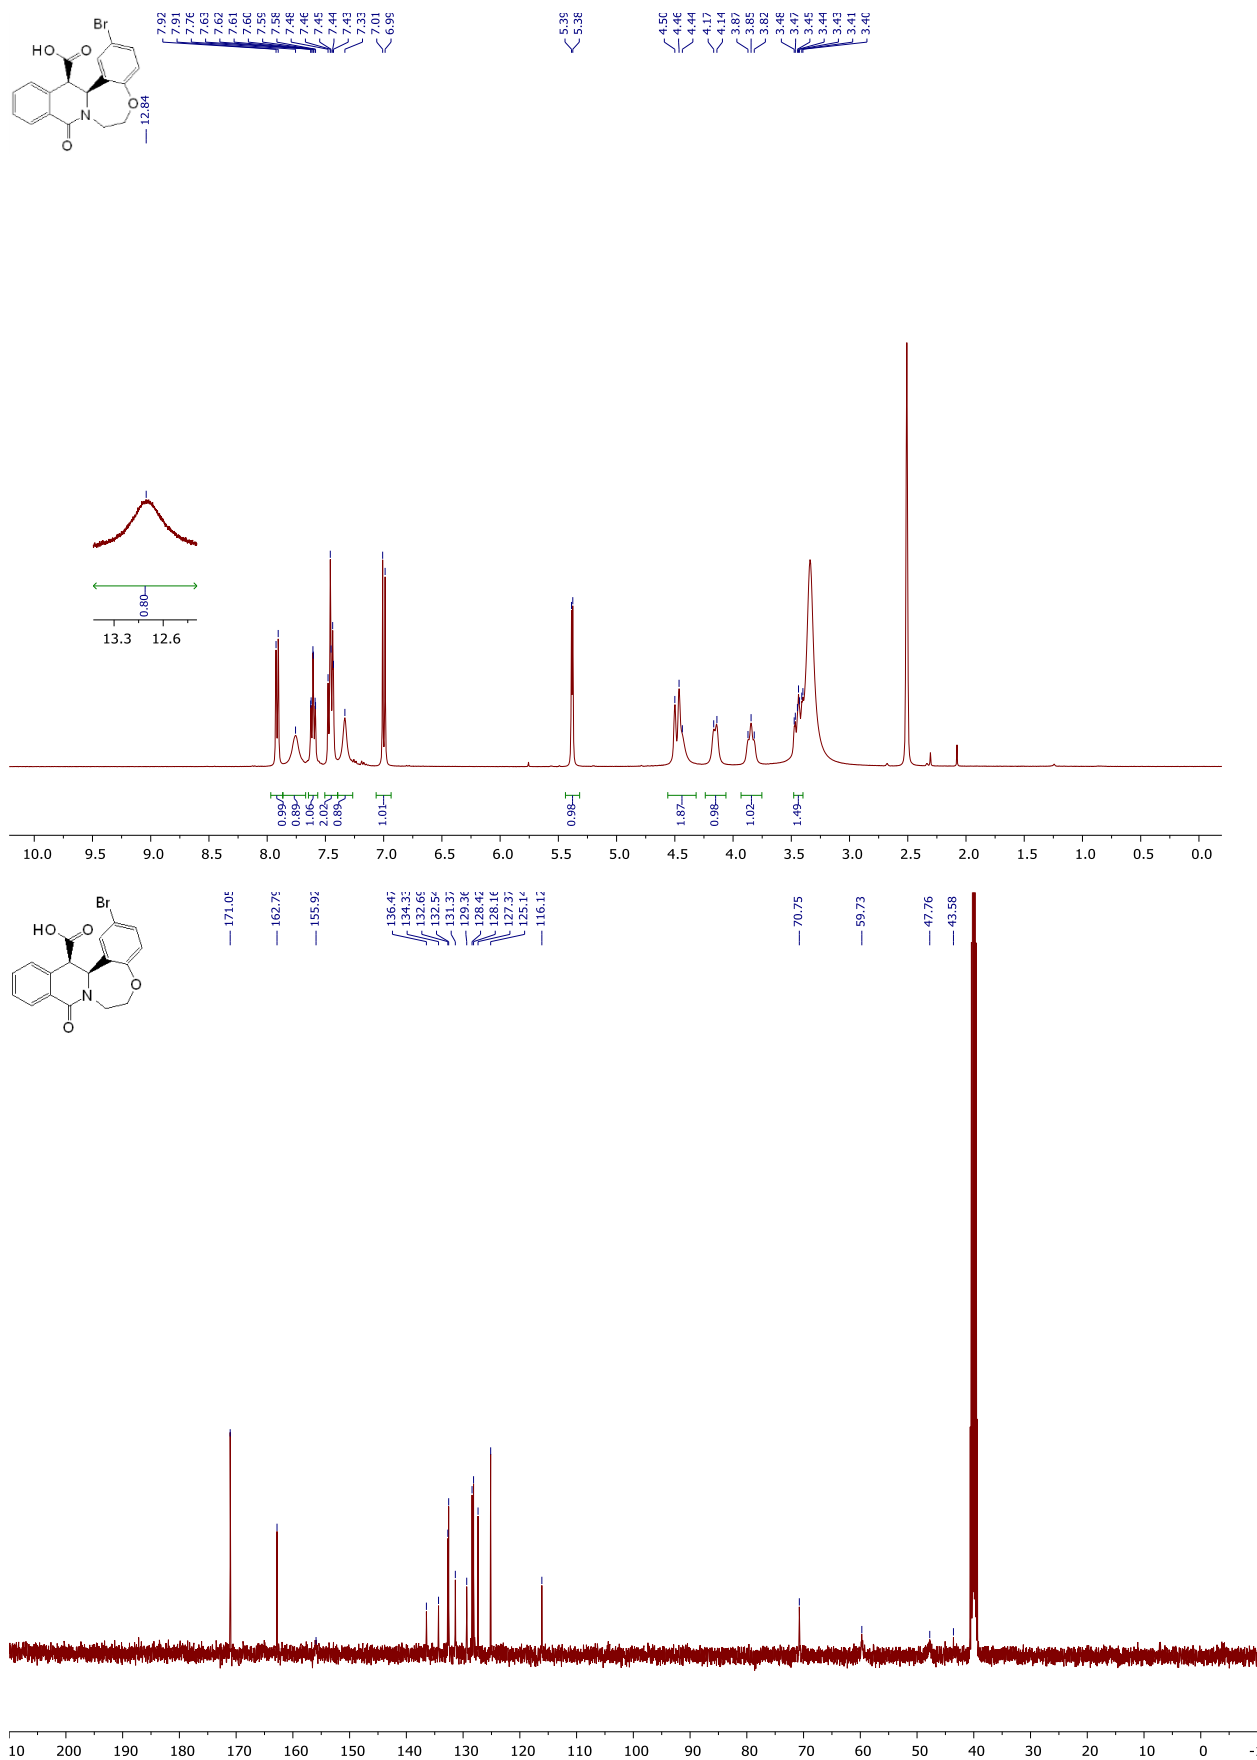

Copies of  $^1\text{H}$  400.13 MHz,  $\text{DMSO}-d_6$  and  $^{13}\text{C}$  100.61 MHz,  $\text{DMSO}-d_6$  spectra of **6e**

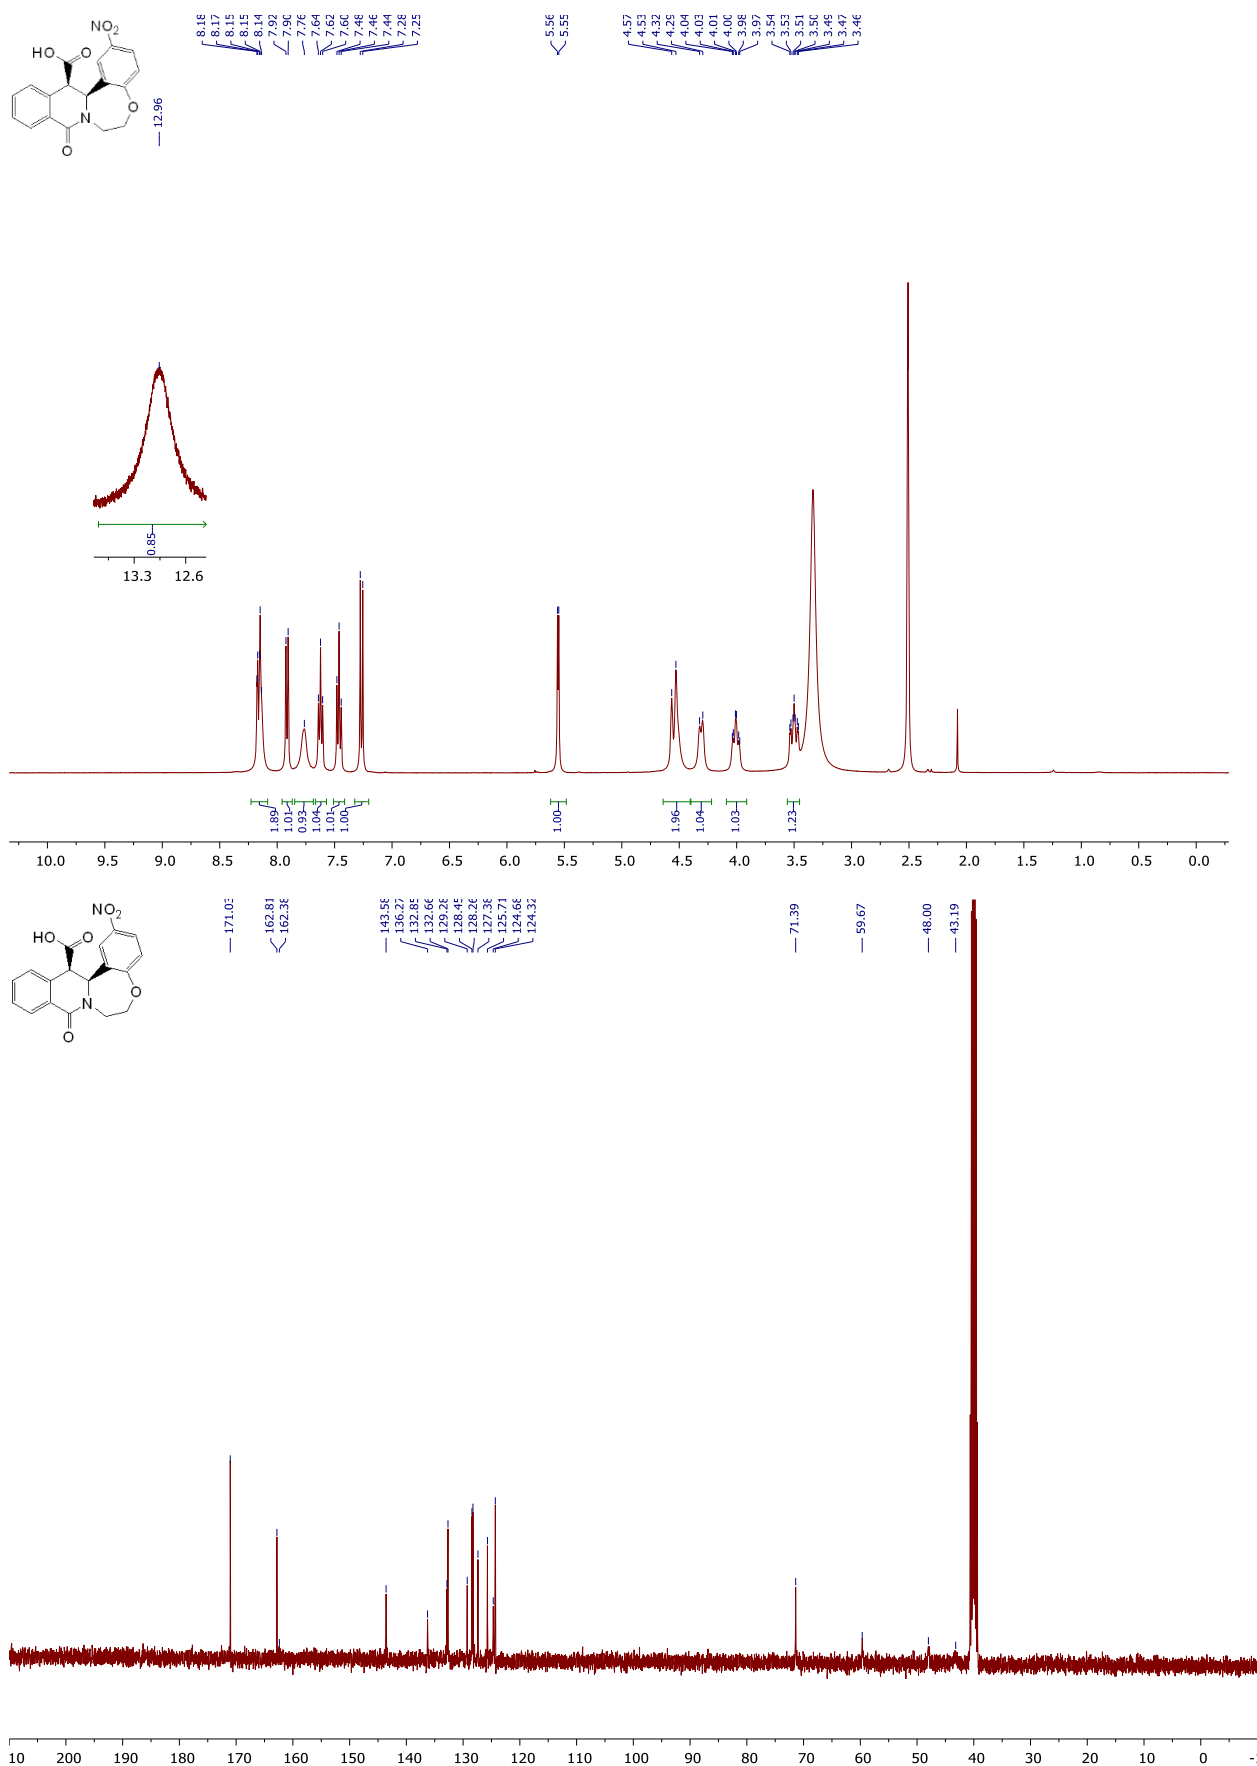

Copies of  $^1\text{H}$  400.13 MHz,  $\text{DMSO}-d_6$  and  $^{13}\text{C}$  100.61 MHz,  $\text{DMSO}-d_6$  spectra of **6f**

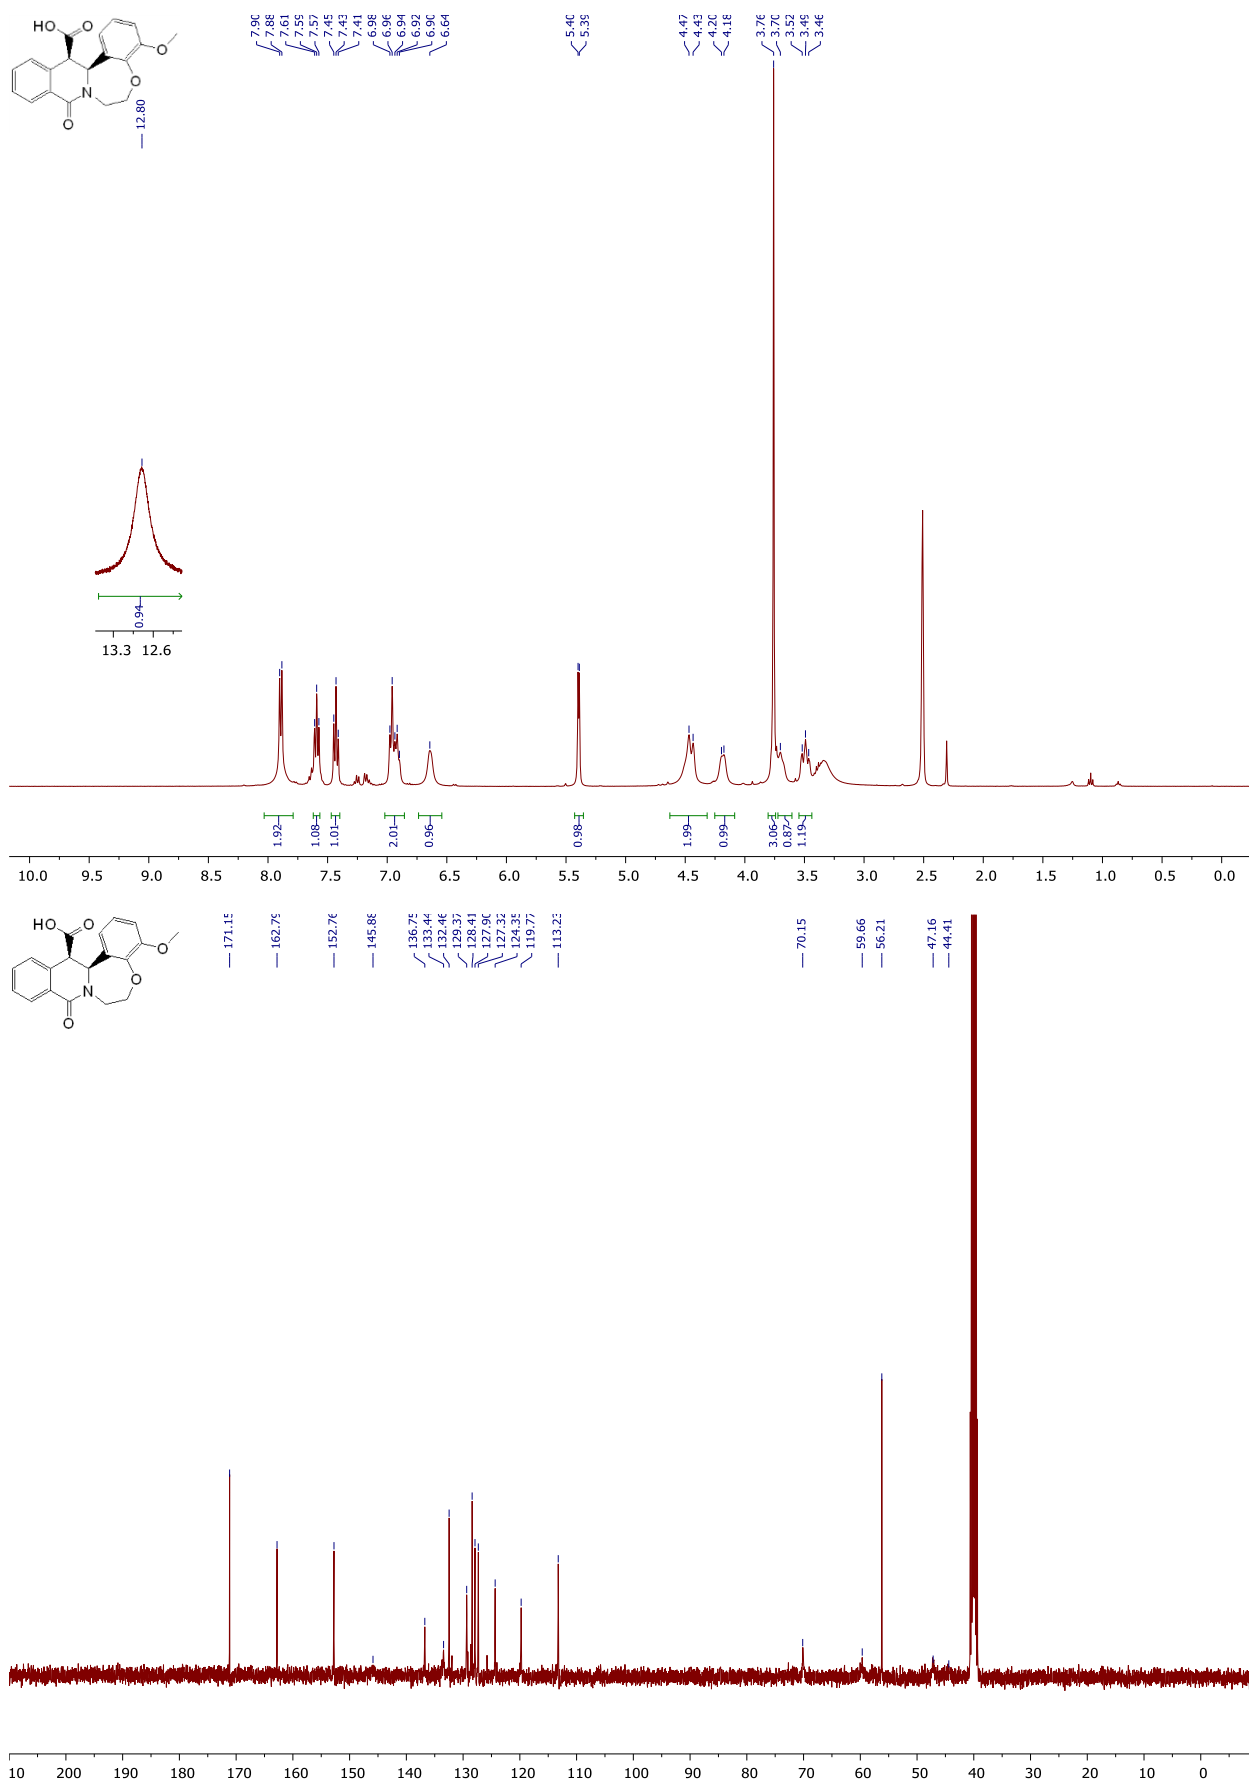



Copies of  $^1\text{H}$  400.13 MHz,  $\text{DMSO}-d_6$  and  $^{13}\text{C}$  100.61 MHz,  $\text{DMSO}-d_6$  spectra of **6g**

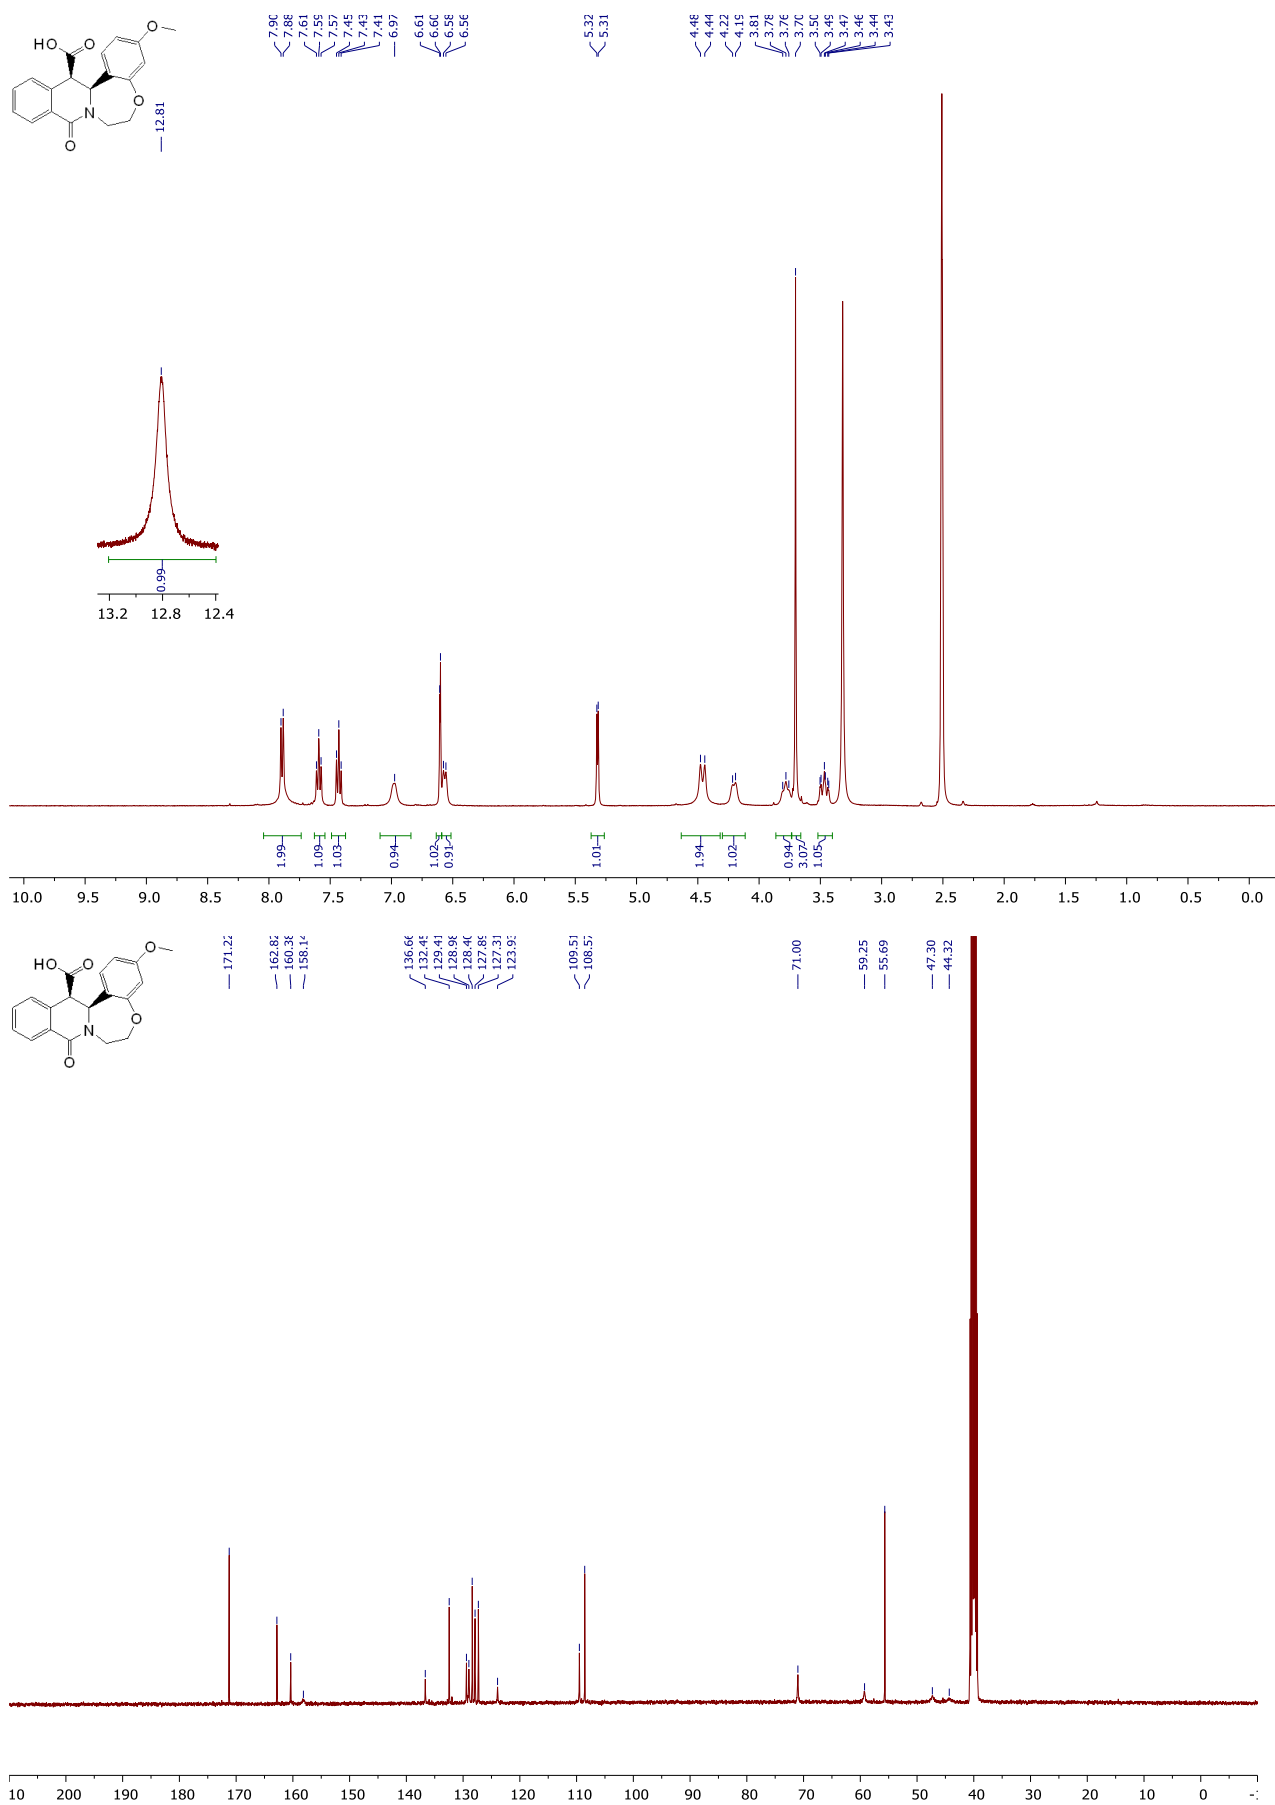

Copies of  $^1\text{H}$  400.13 MHz,  $\text{DMSO}-d_6$  and  $^{13}\text{C}$  100.61 MHz,  $\text{DMSO}-d_6$  spectra of **6h**

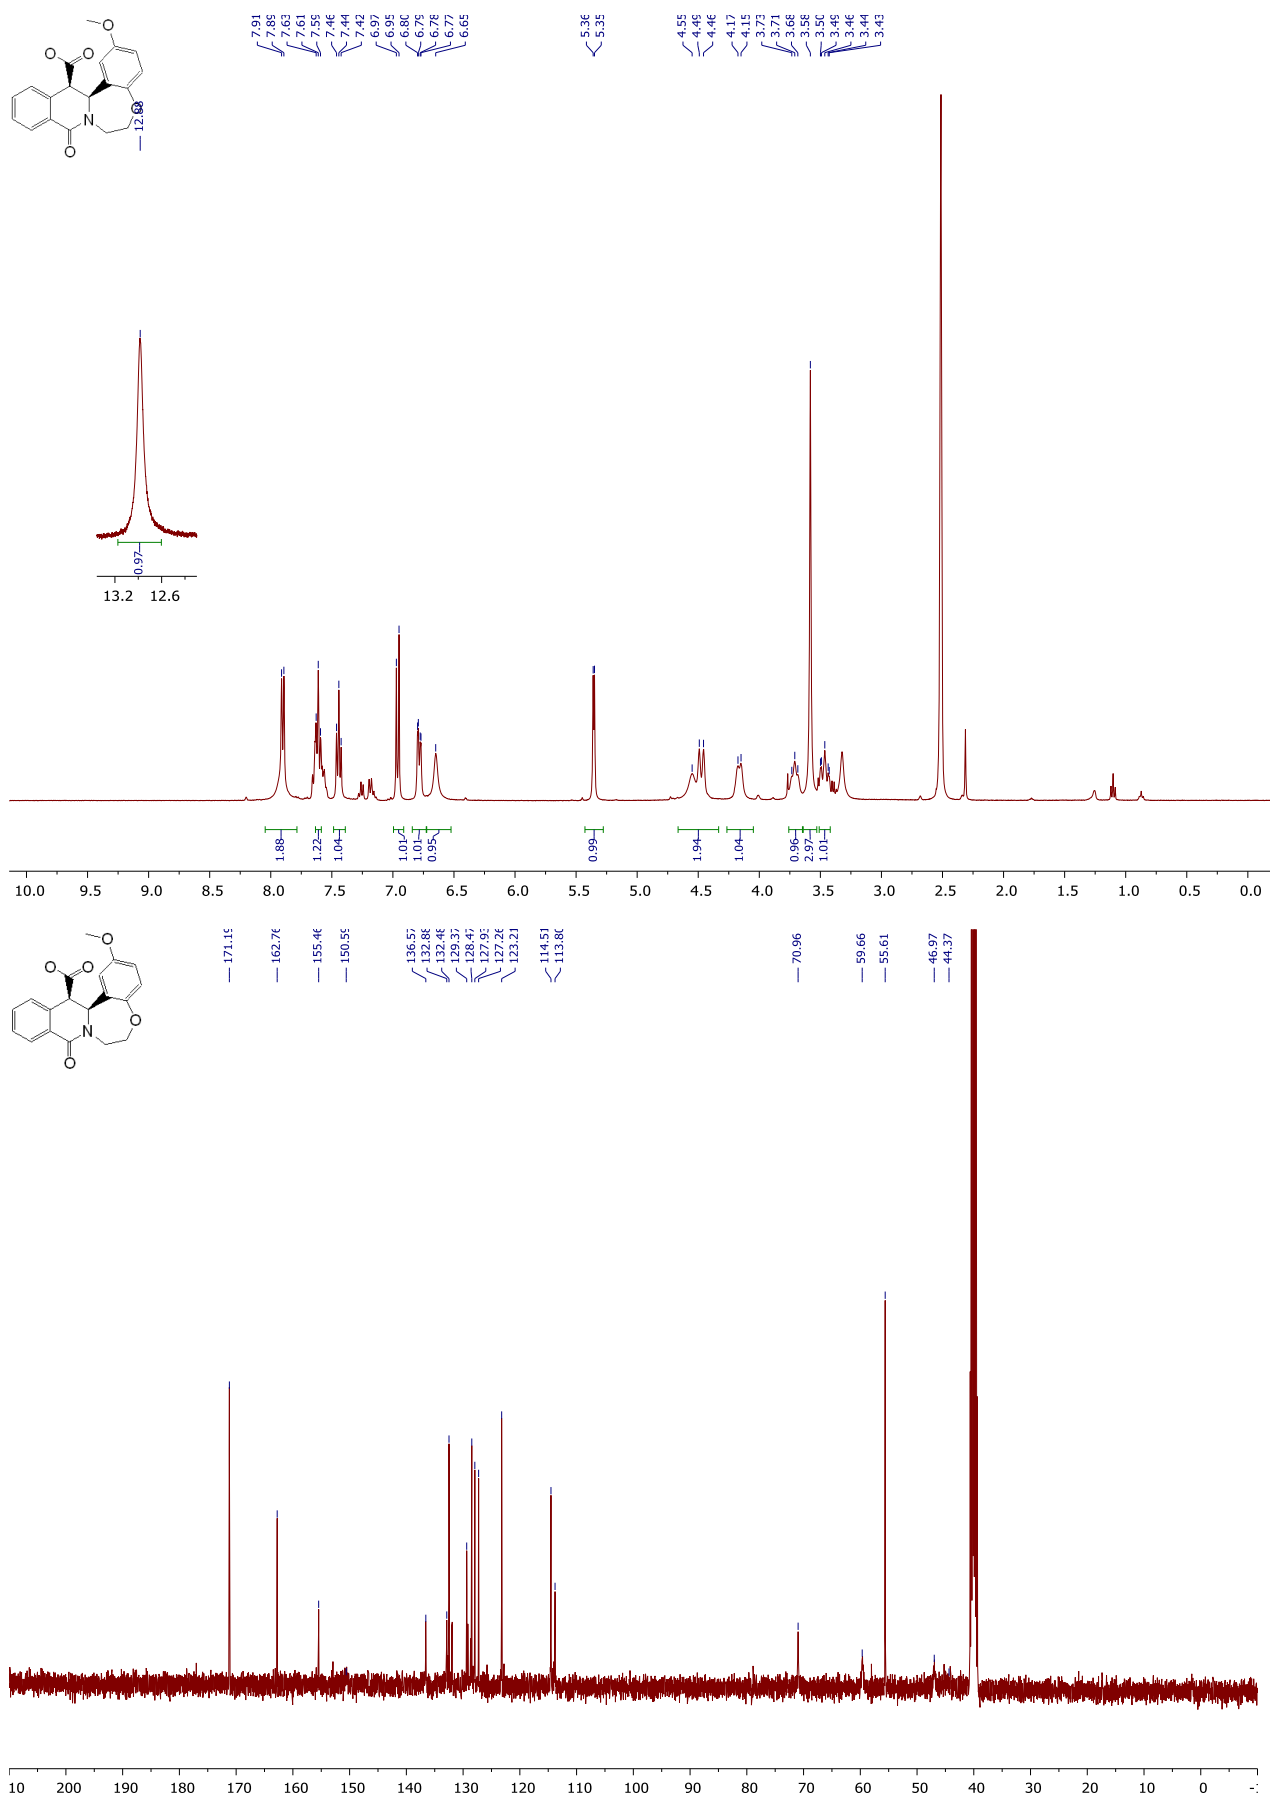

Copies of  $^1\text{H}$  400.13 MHz, DMSO- $d_6$  and  $^{13}\text{C}$  100.61 MHz, DMSO- $d_6$  spectra of **6i**

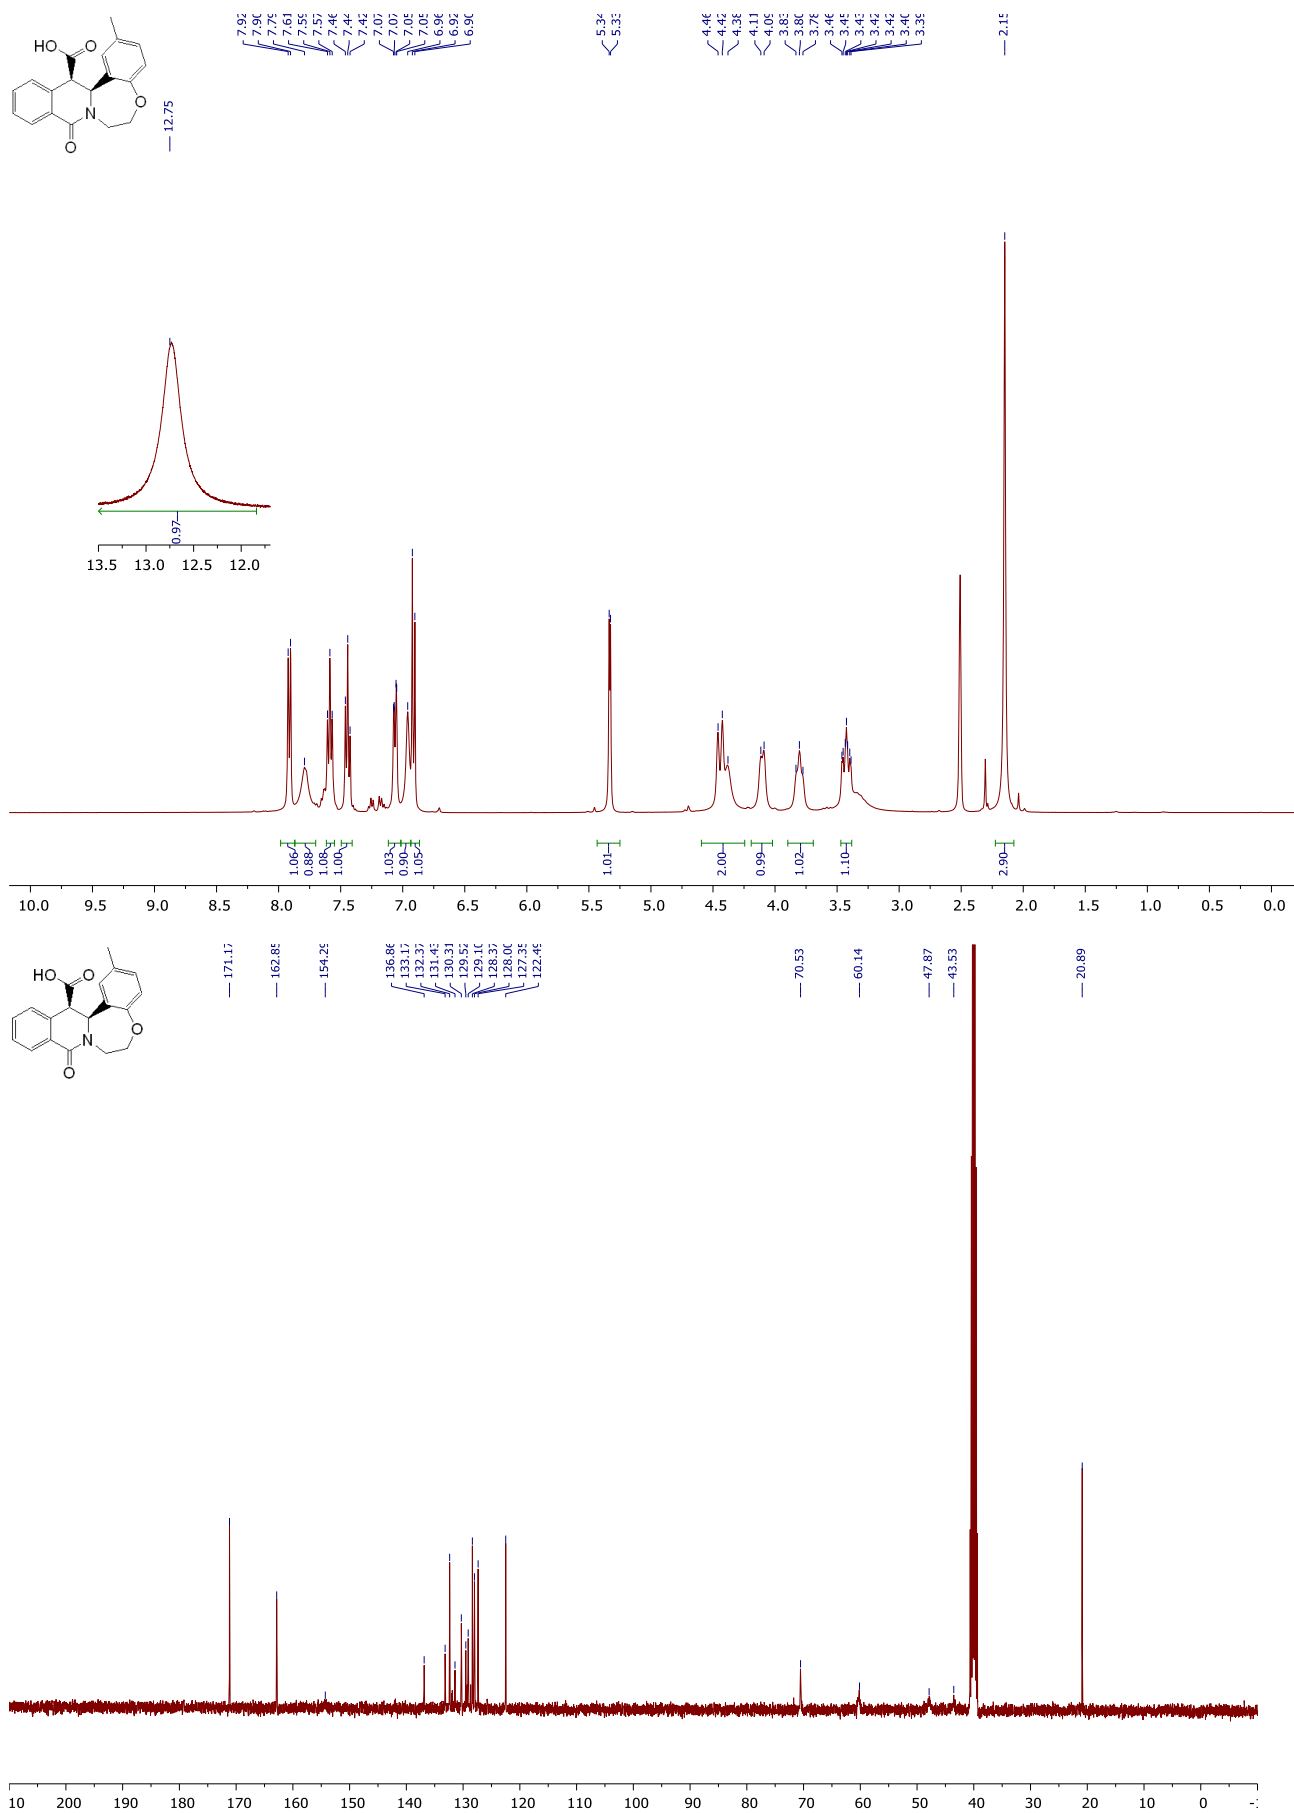

Copies of  $^1\text{H}$  400.13 MHz, DMSO- $d_6$  and  $^{13}\text{C}$  100.61 MHz, DMSO- $d_6$  spectra of **6j**

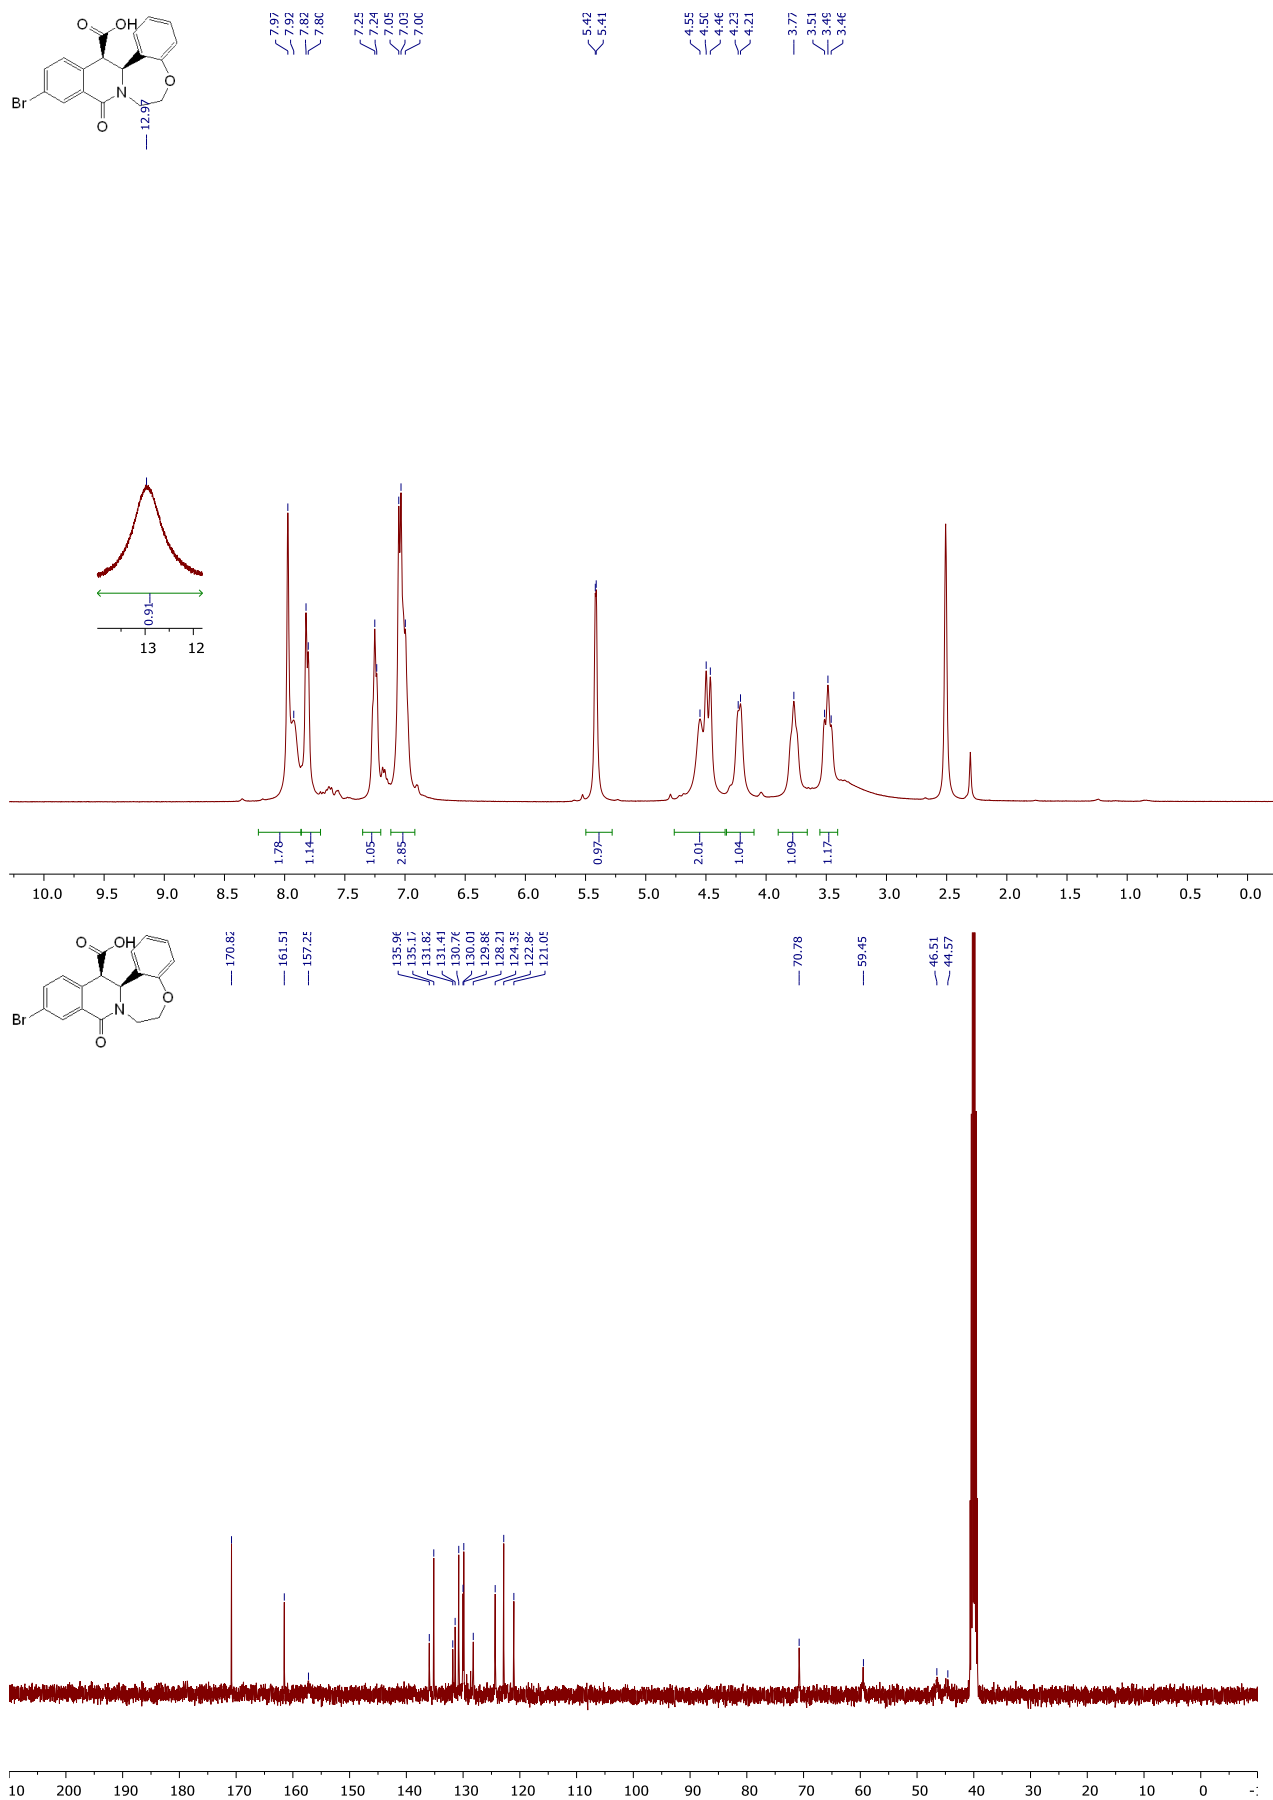

Copies of  $^1\text{H}$  400.13 MHz,  $\text{DMSO}-d_6$  and  $^{13}\text{C}$  100.61 MHz,  $\text{DMSO}-d_6$  spectra of **6k**

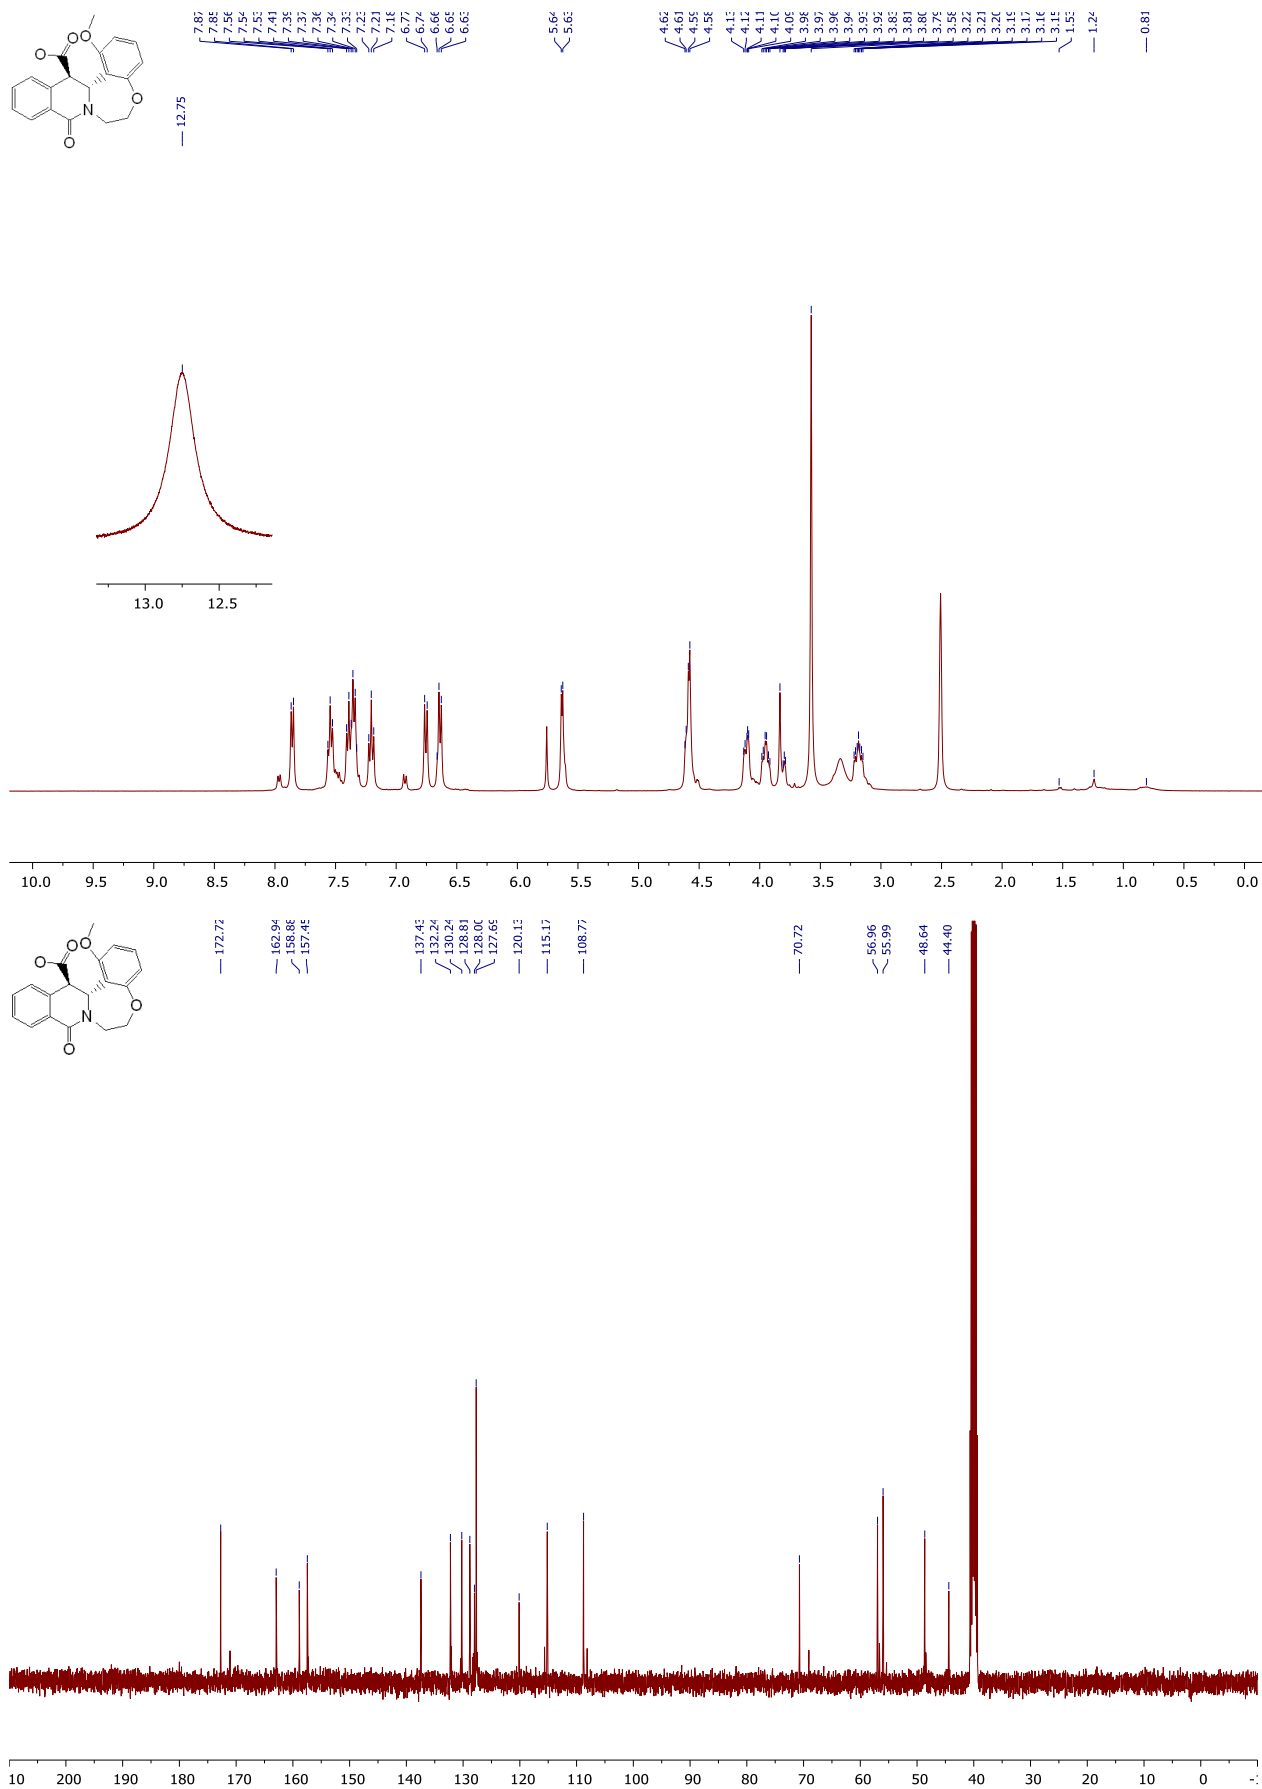

Copies of  $^1\text{H}$  400.13 MHz, DMSO- $d_6$  and  $^{13}\text{C}$  100.61 MHz, DMSO- $d_6$  spectra of **6l**

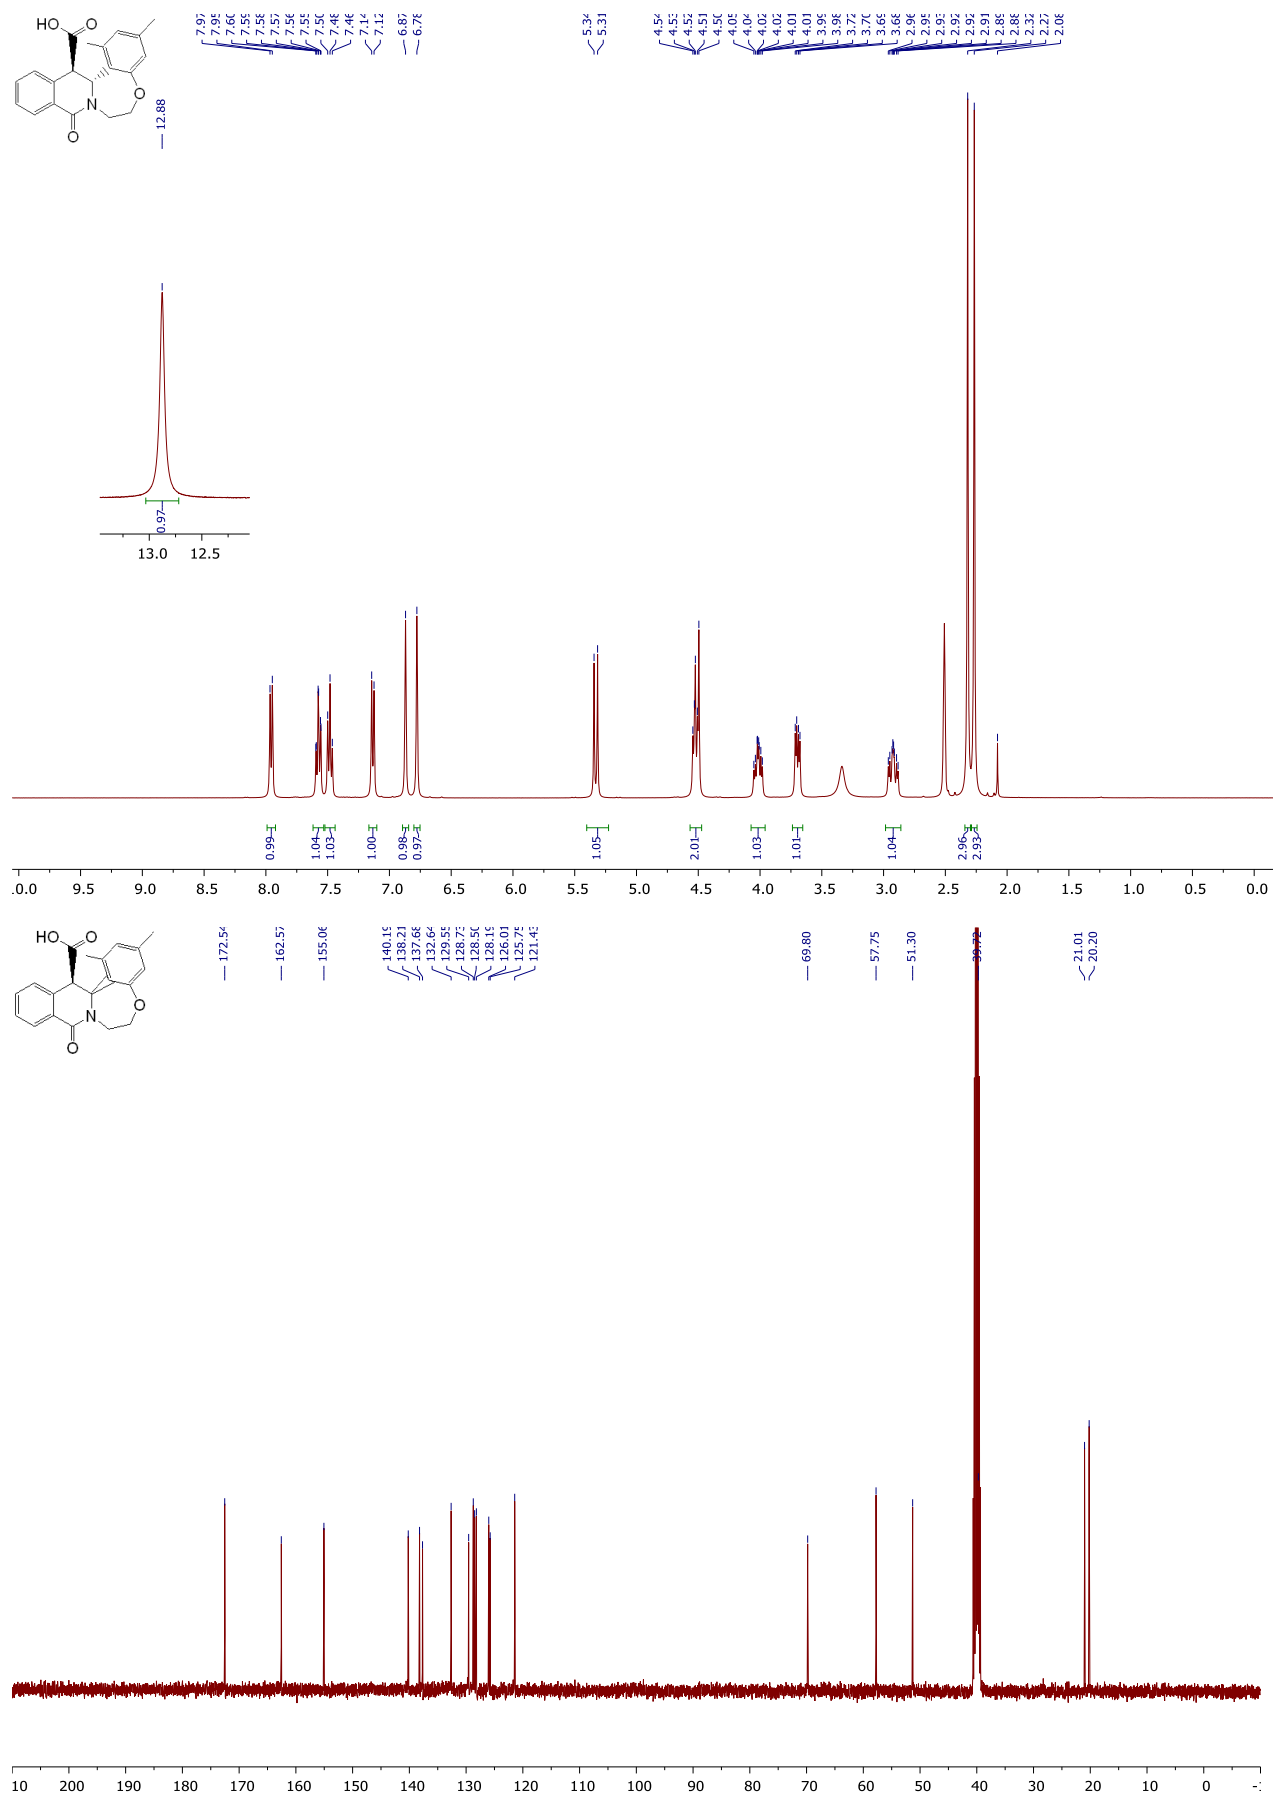

Copies of  $^1\text{H}$  400.13 MHz, DMSO- $d_6$  and  $^{13}\text{C}$  100.61 MHz, DMSO- $d_6$  spectra of **6m**

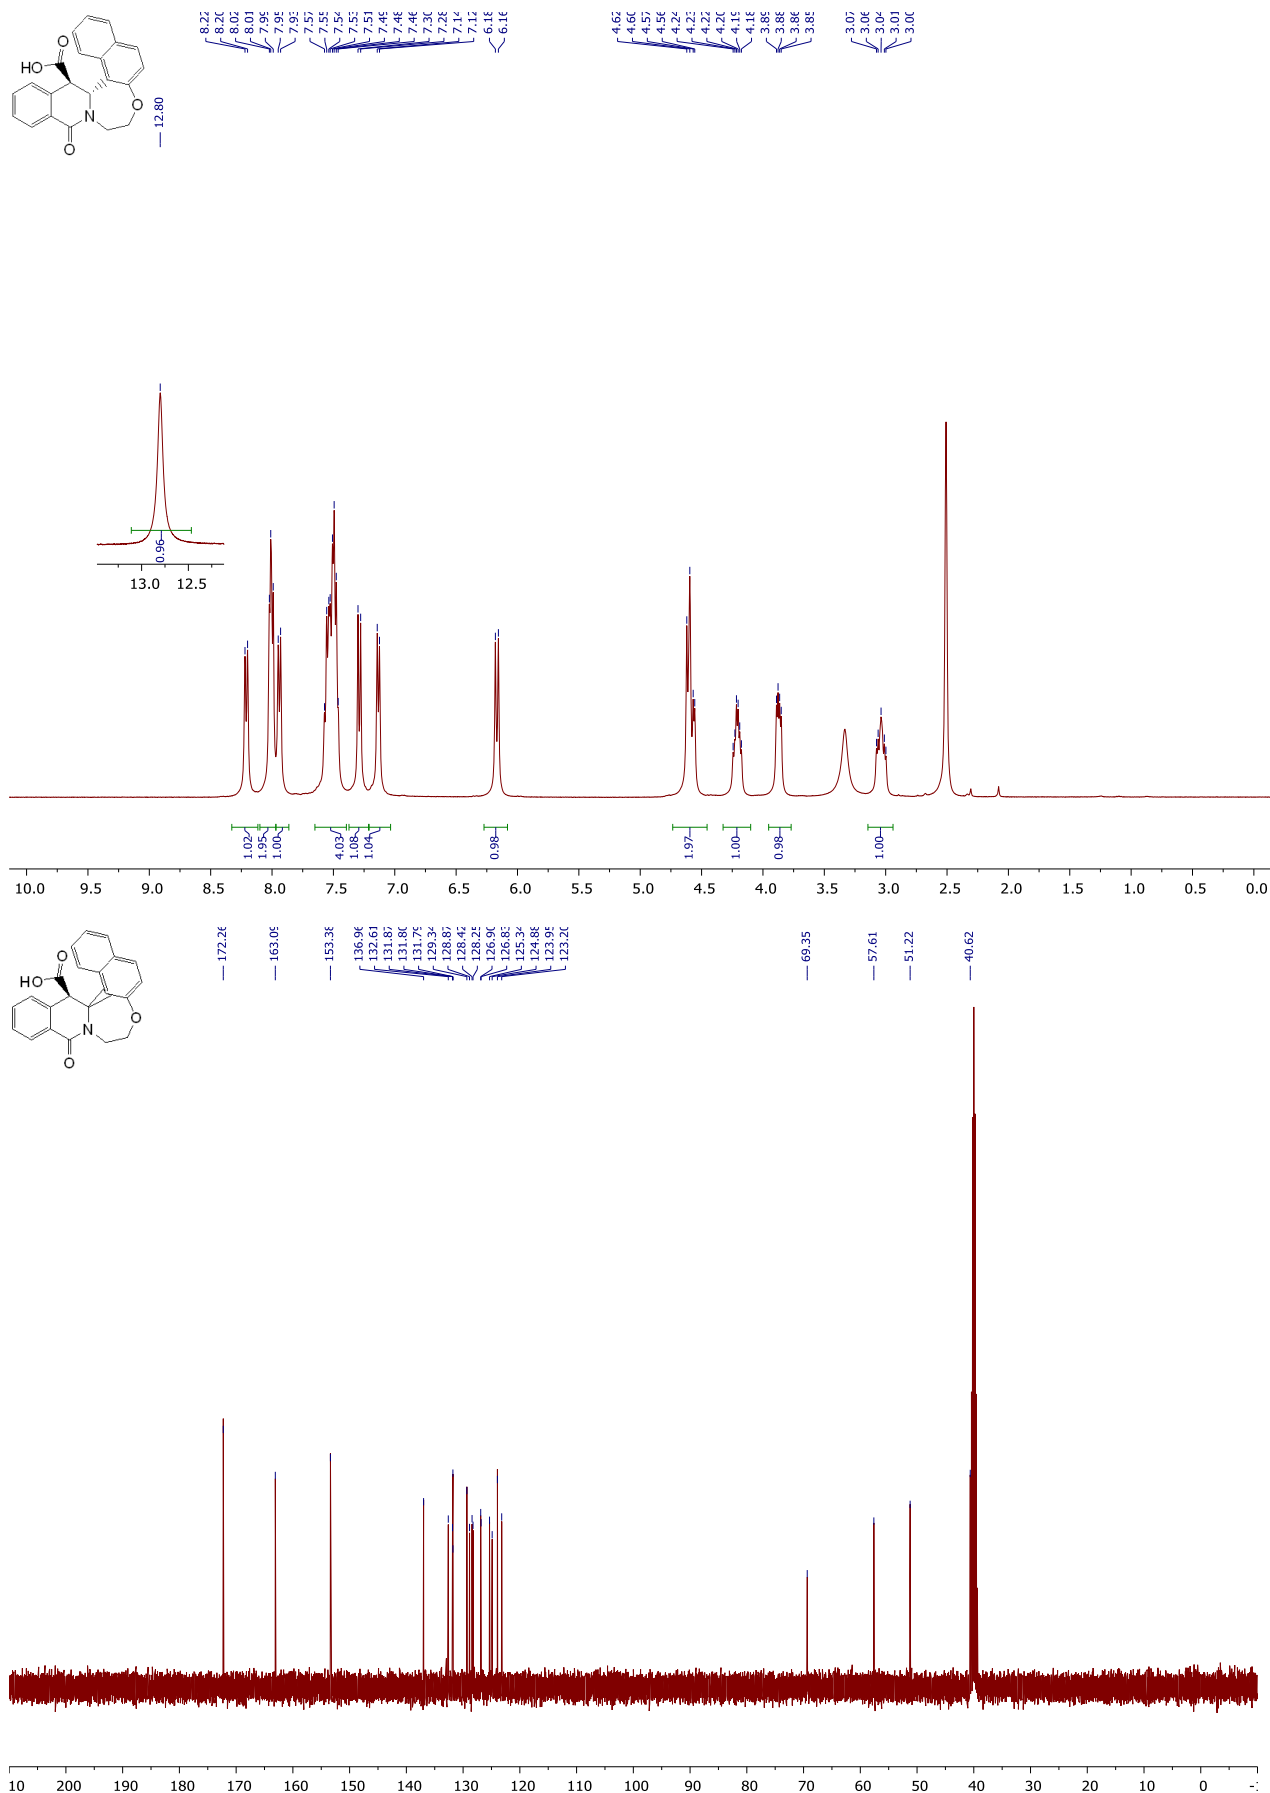

Copies of  $^1\text{H}$  400.13 MHz,  $\text{CDCl}_3$  and  $^{13}\text{C}$  100.61 MHz,  $\text{CDCl}_3$  spectra of **7**

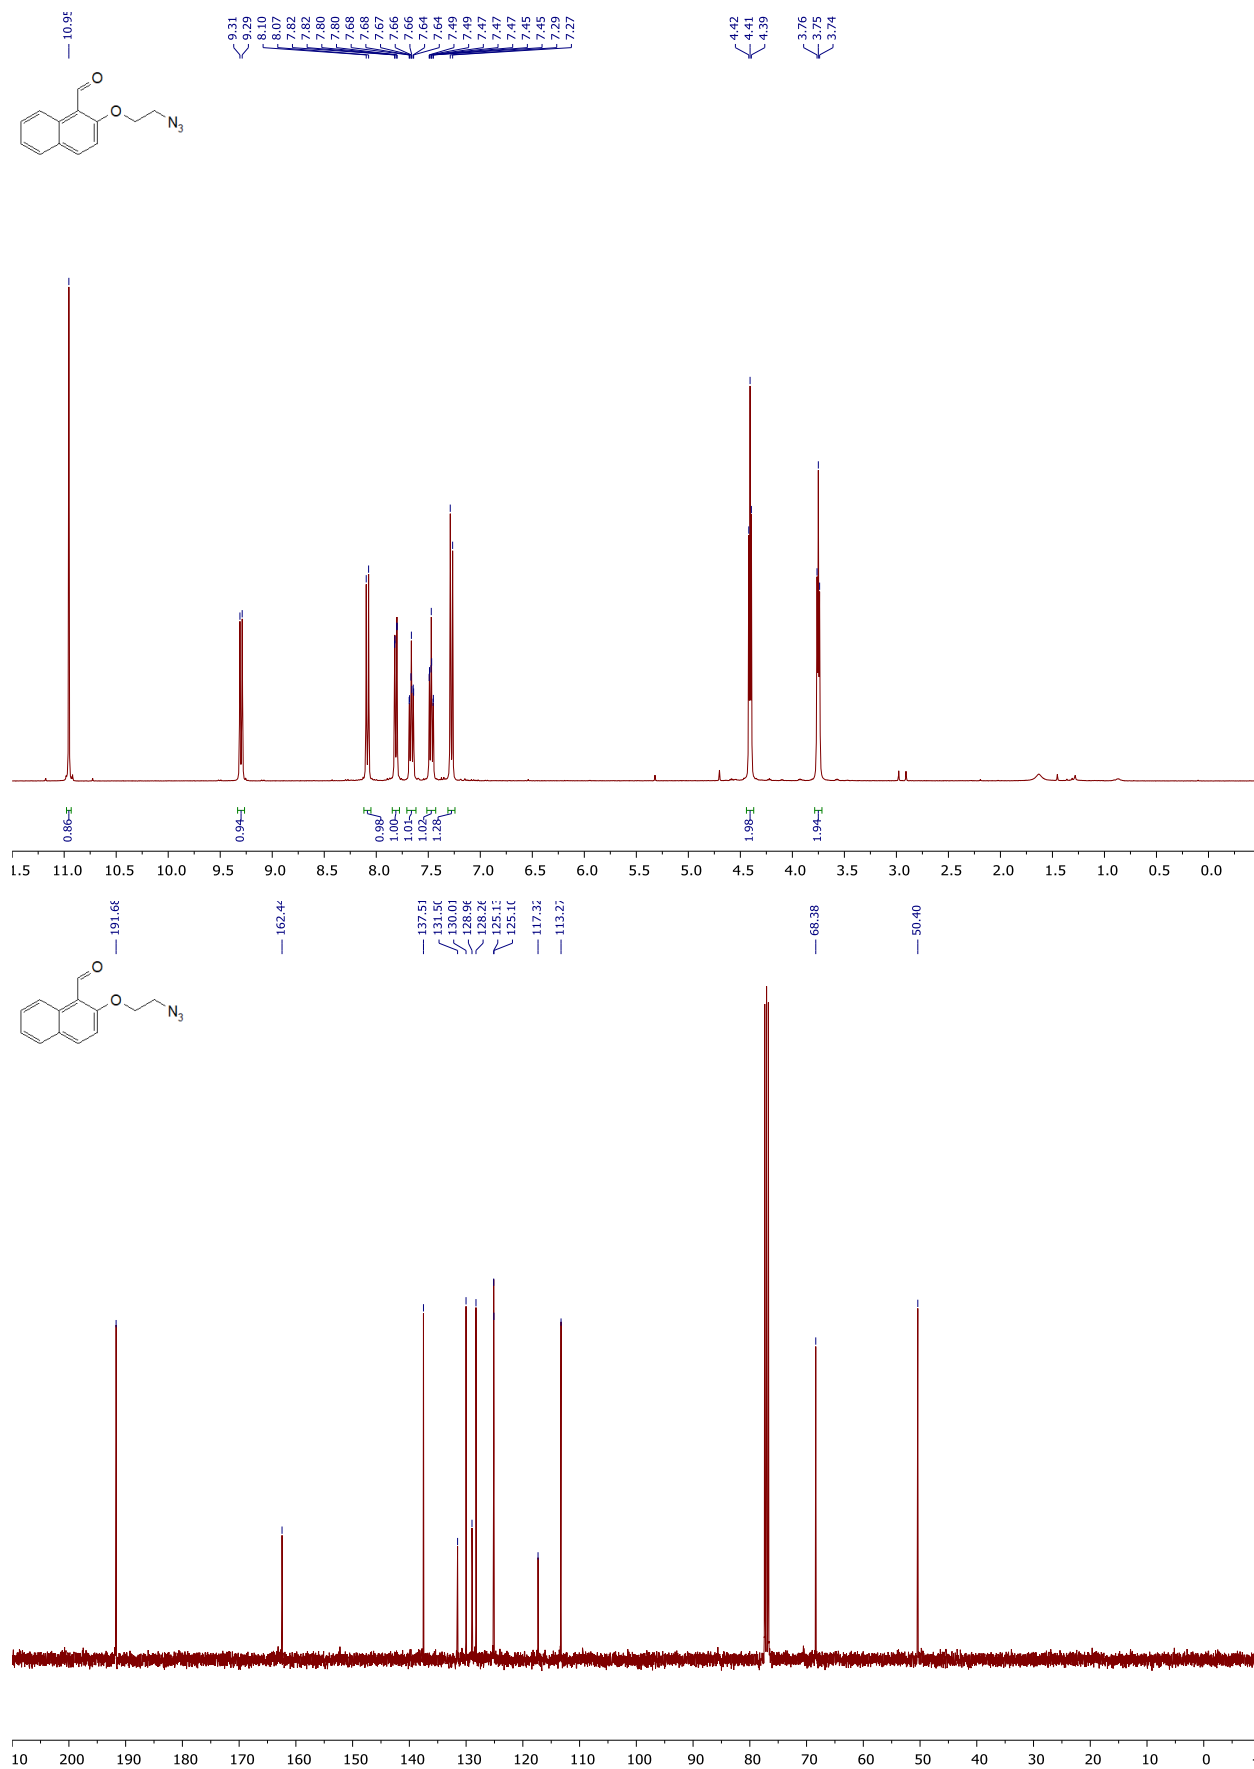



Copies of  $^1\text{H}$  400.13 MHz,  $\text{CDCl}_3$  and  $^{13}\text{C}$  100.61 MHz,  $\text{CDCl}_3$  spectra of **8**

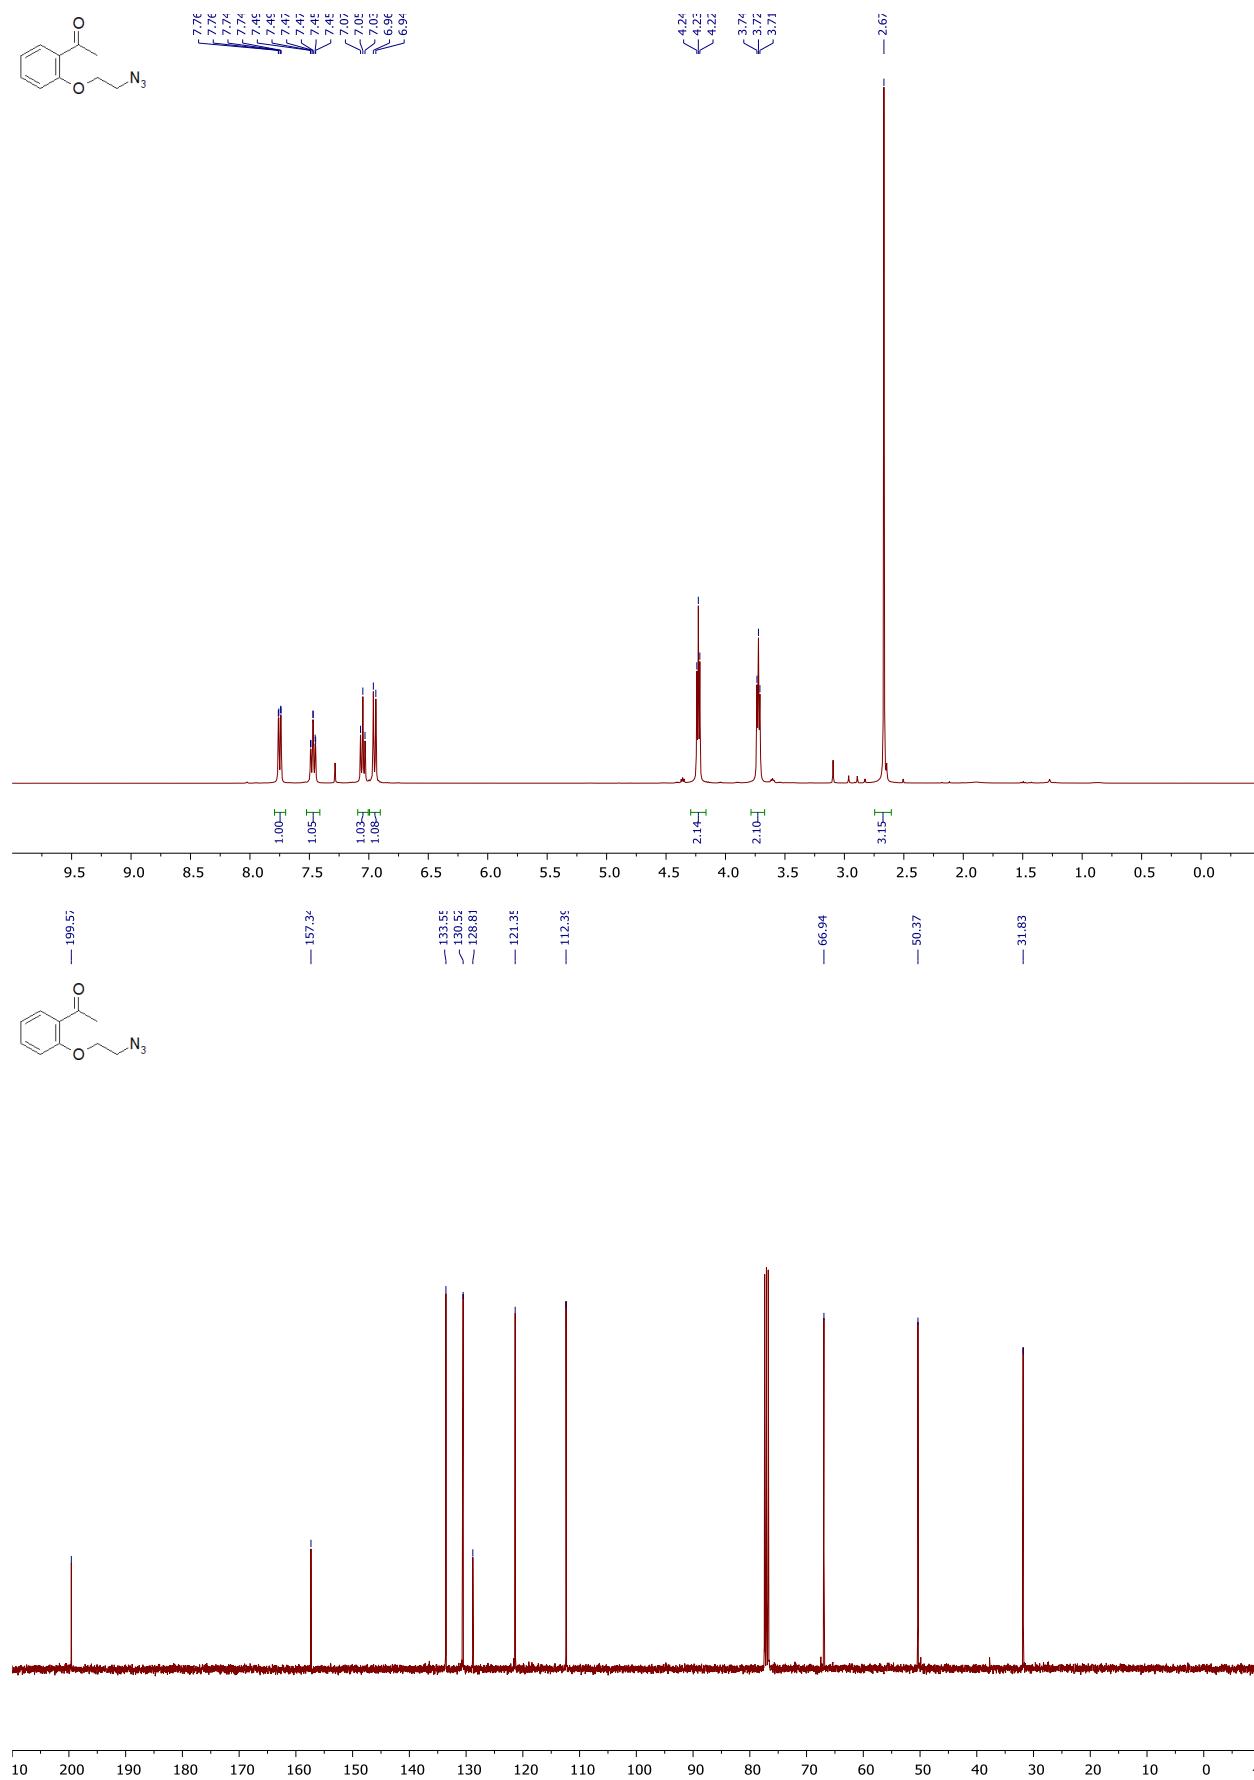

Copies of  $^1\text{H}$  400.13 MHz,  $\text{CDCl}_3$  and  $^{13}\text{C}$  100.61 MHz,  $\text{CDCl}_3$  spectra of **10a**

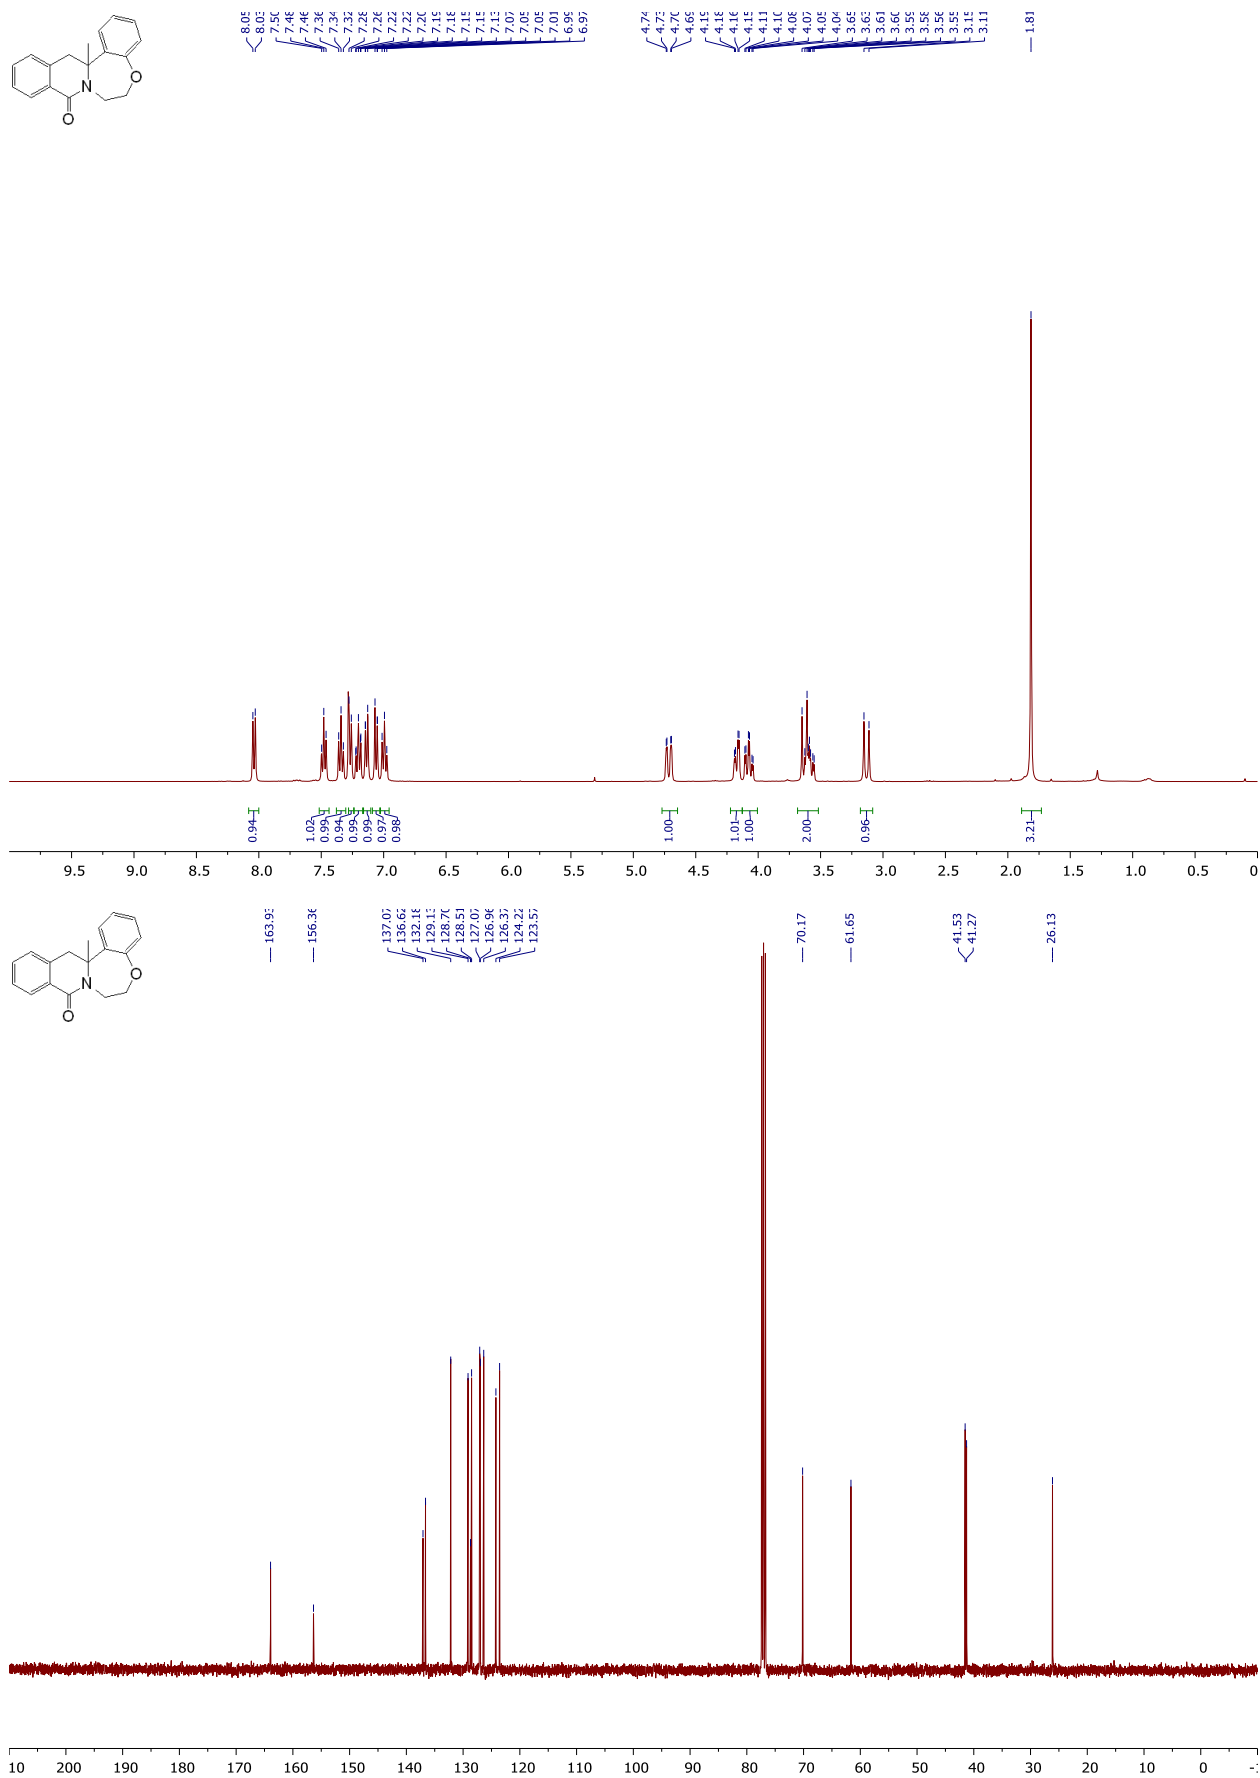

Copies of  $^1\text{H}$  400.13 MHz,  $\text{CDCl}_3$  and  $^{13}\text{C}$  100.61 MHz,  $\text{CDCl}_3$  spectra of **10b**

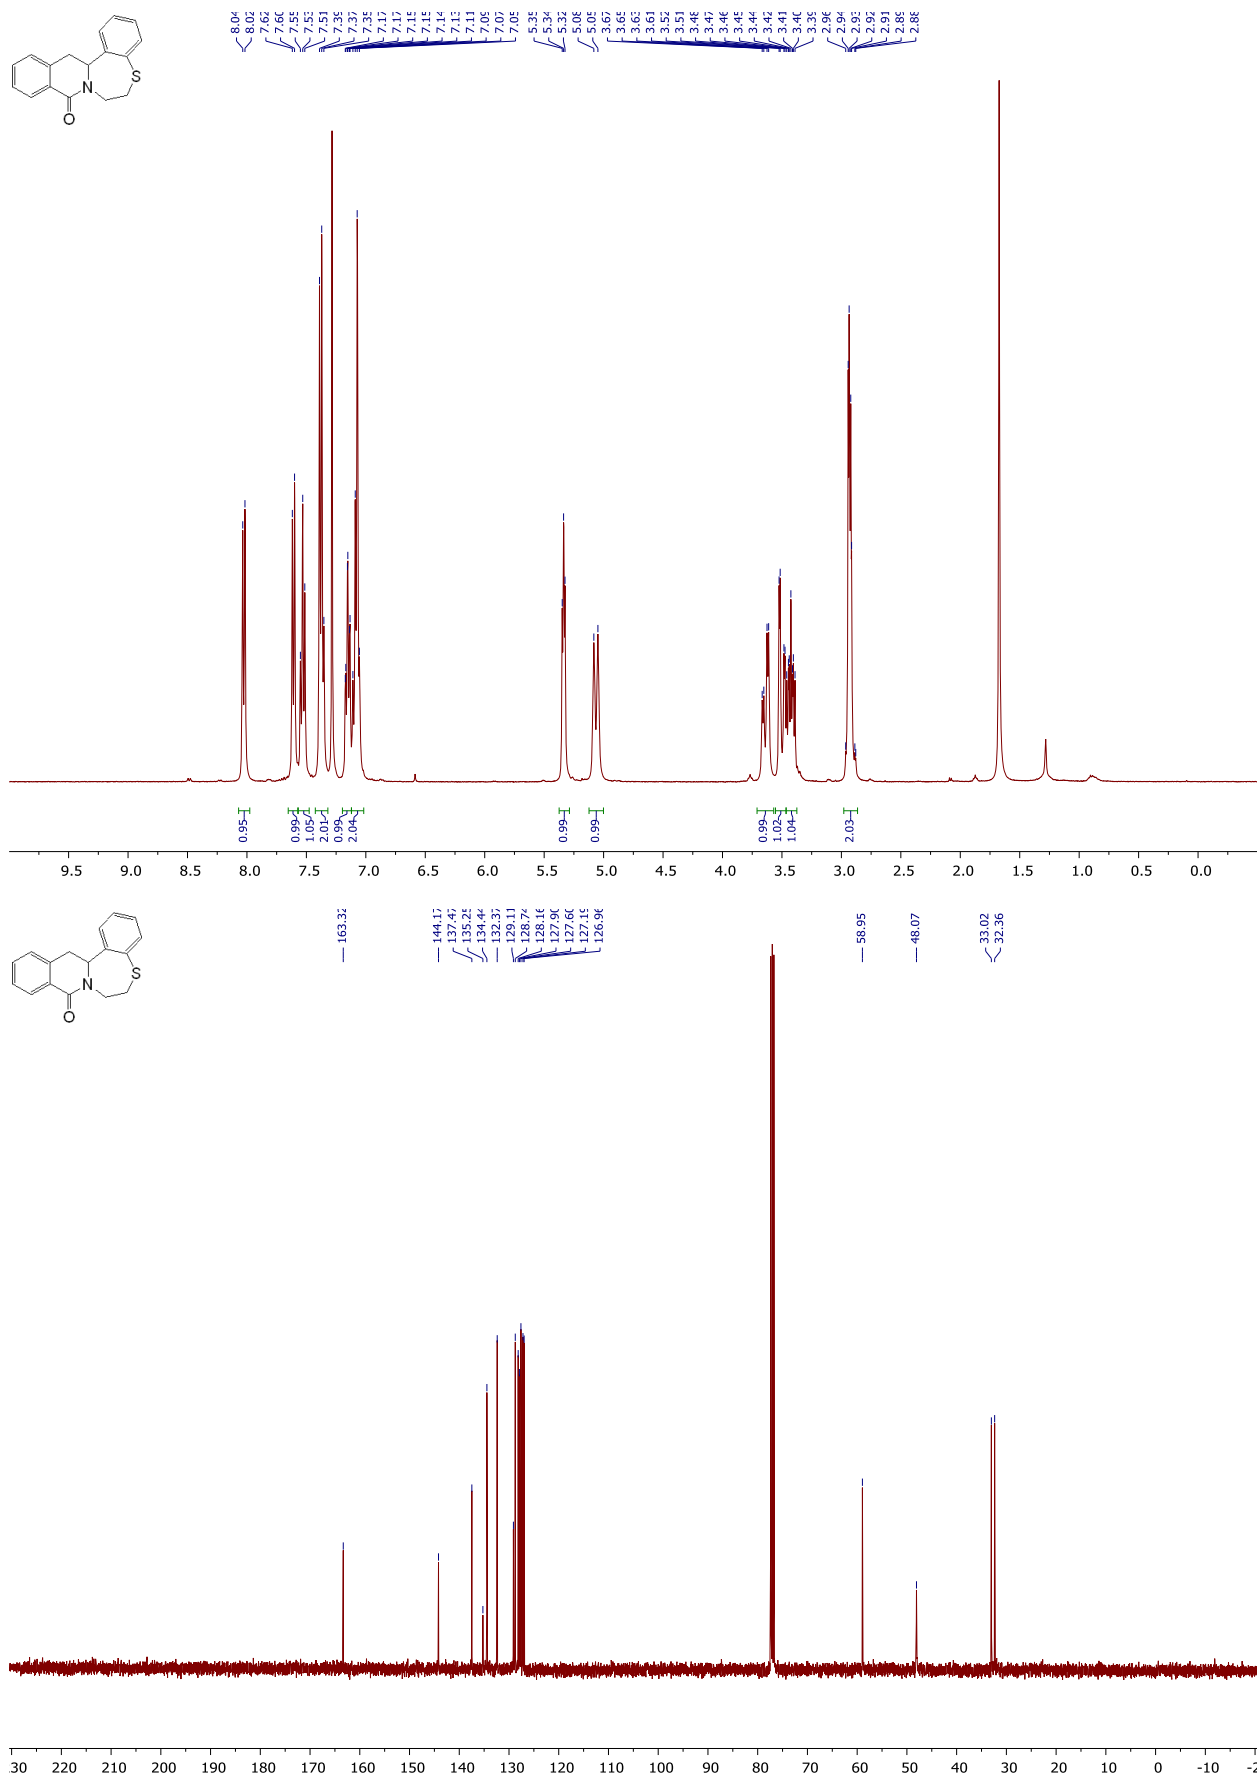

Copies of  $^1\text{H}$  400.13 MHz,  $\text{CDCl}_3$  and  $^{13}\text{C}$  100.61 MHz,  $\text{CDCl}_3$  spectra of **10c**

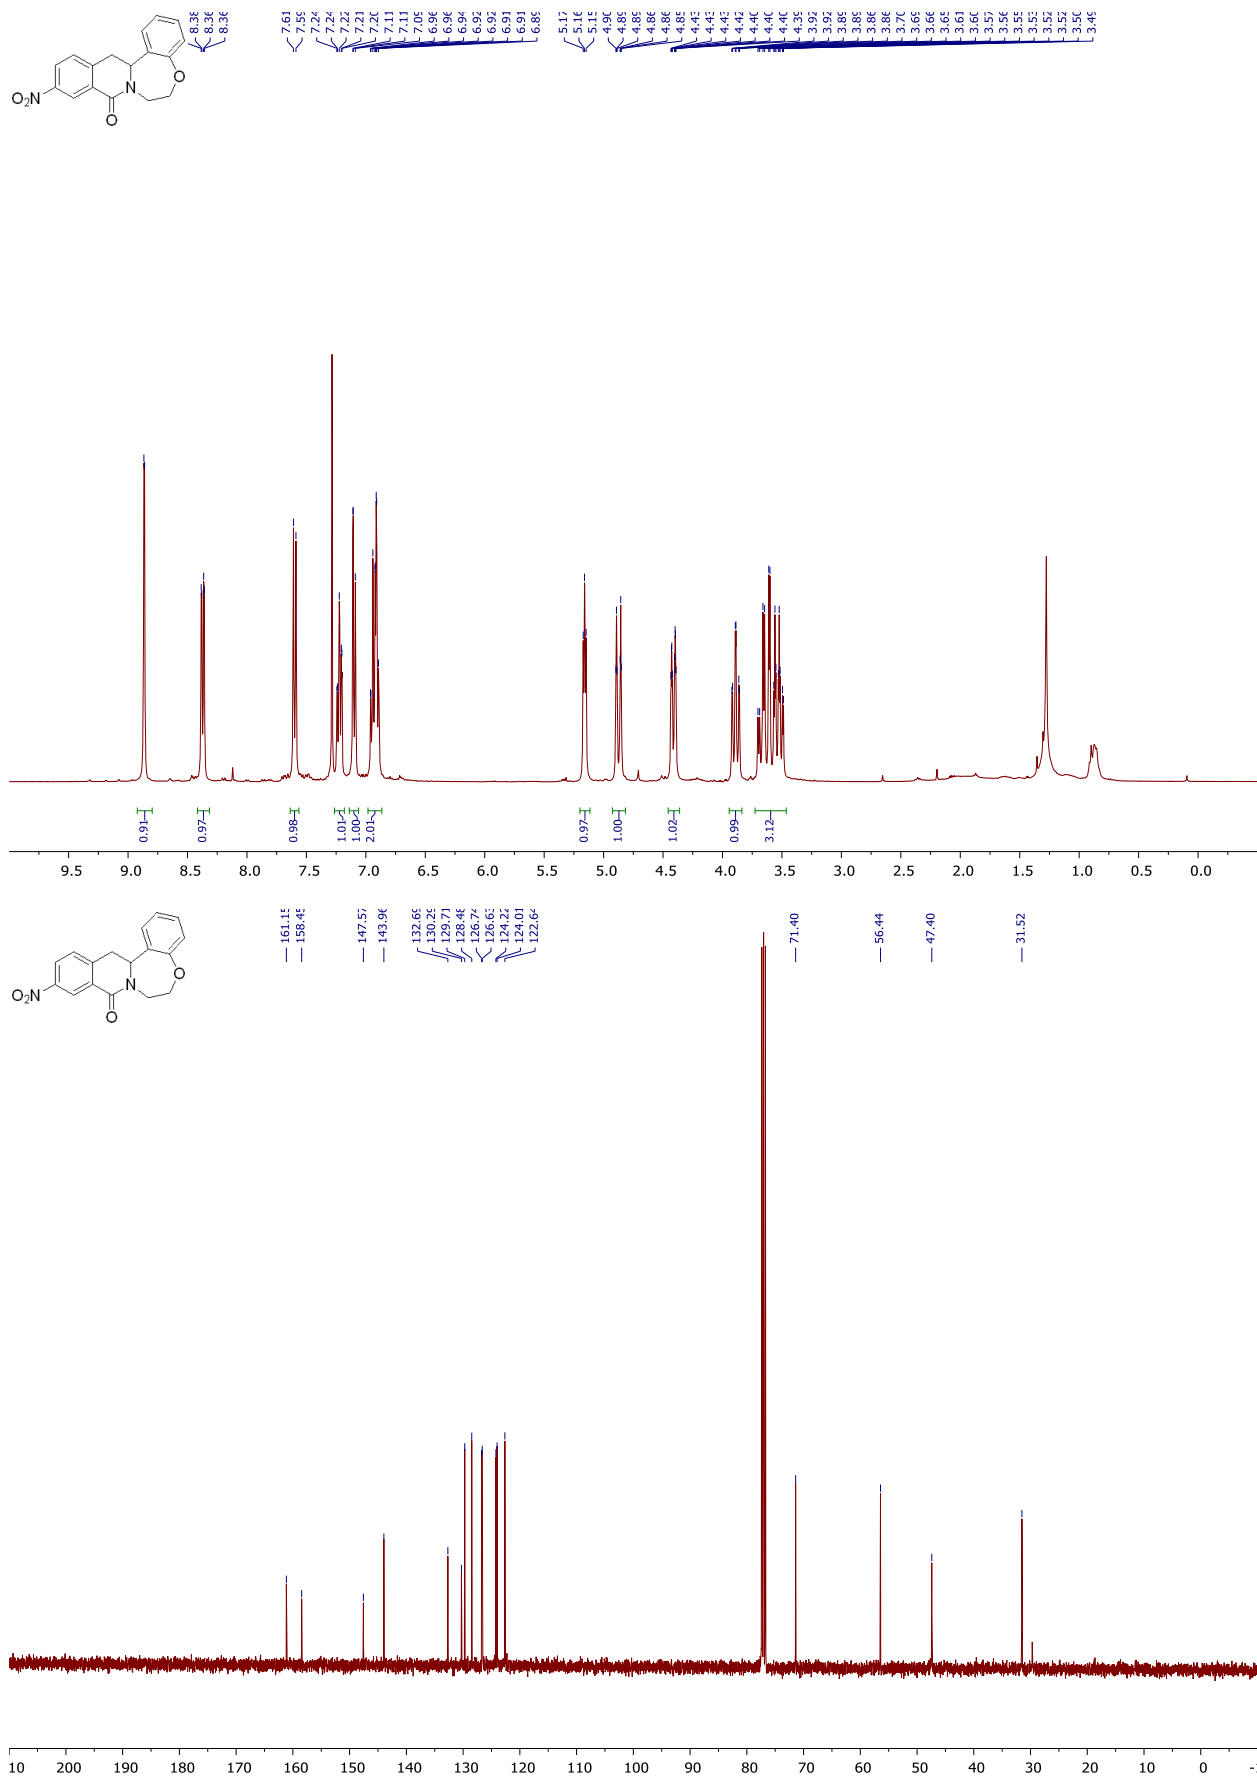

Copies of  $^1\text{H}$  400.13 MHz,  $\text{CDCl}_3$  and  $^{13}\text{C}$  100.61 MHz,  $\text{CDCl}_3$  spectra of **10d**

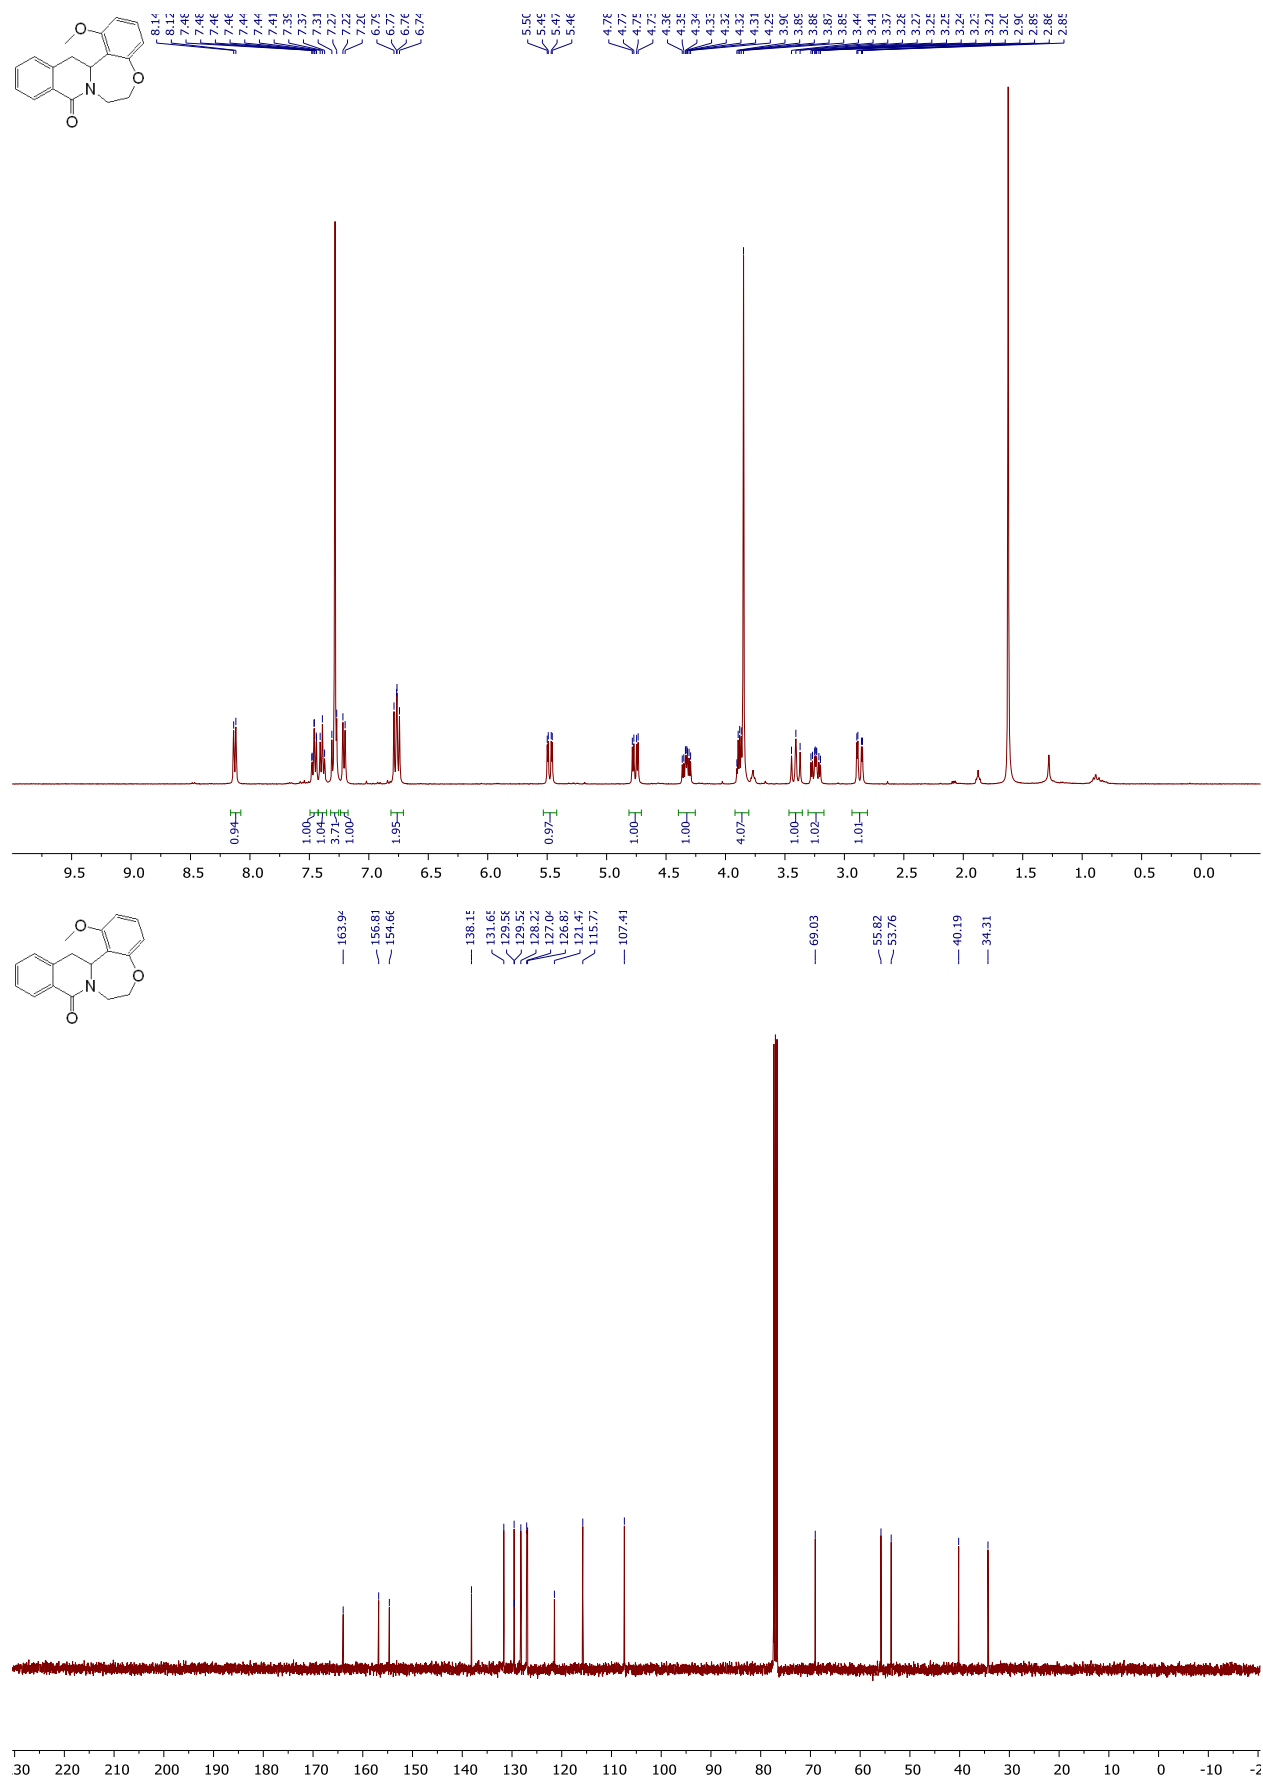

Copies of  $^1\text{H}$  400.13 MHz,  $\text{CDCl}_3$  and  $^{13}\text{C}$  100.61 MHz,  $\text{CDCl}_3$  spectra of **10e**

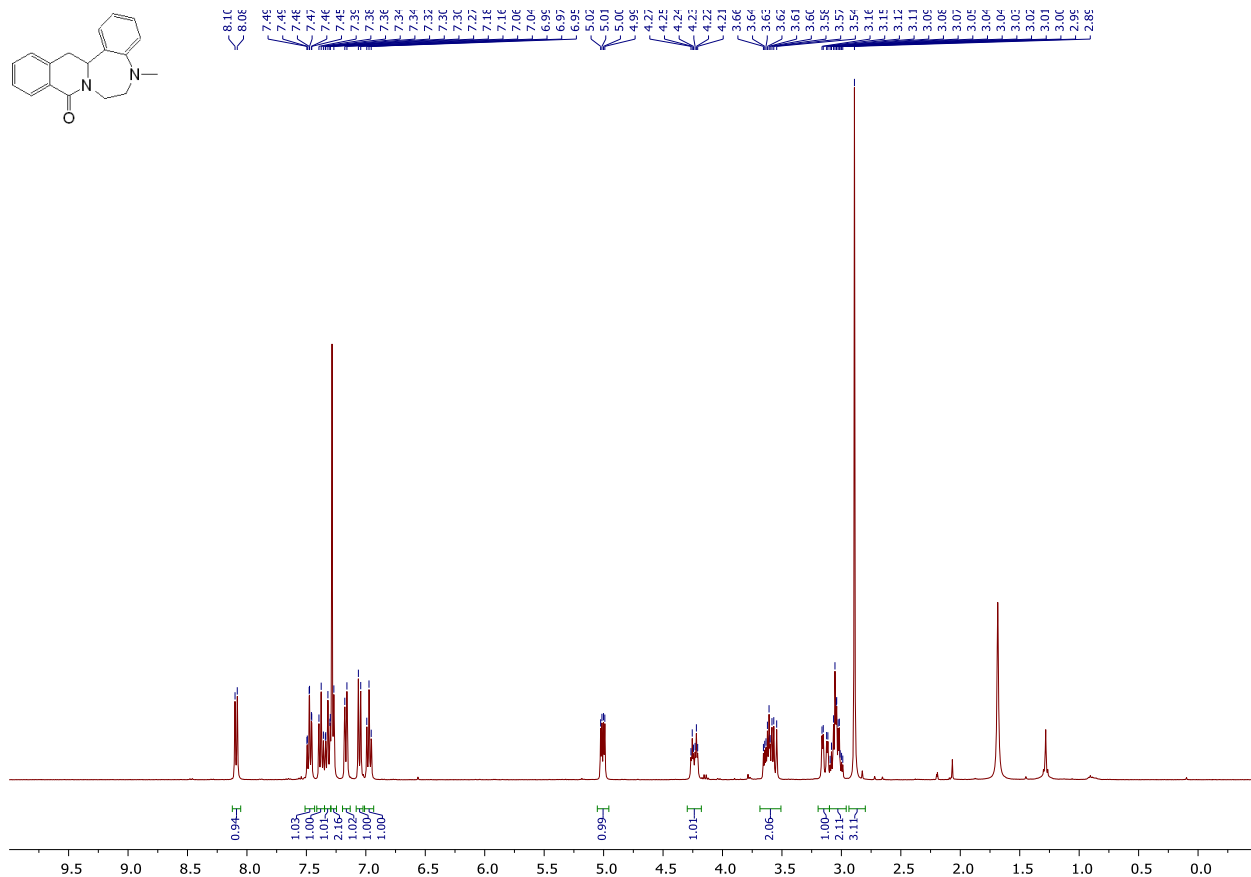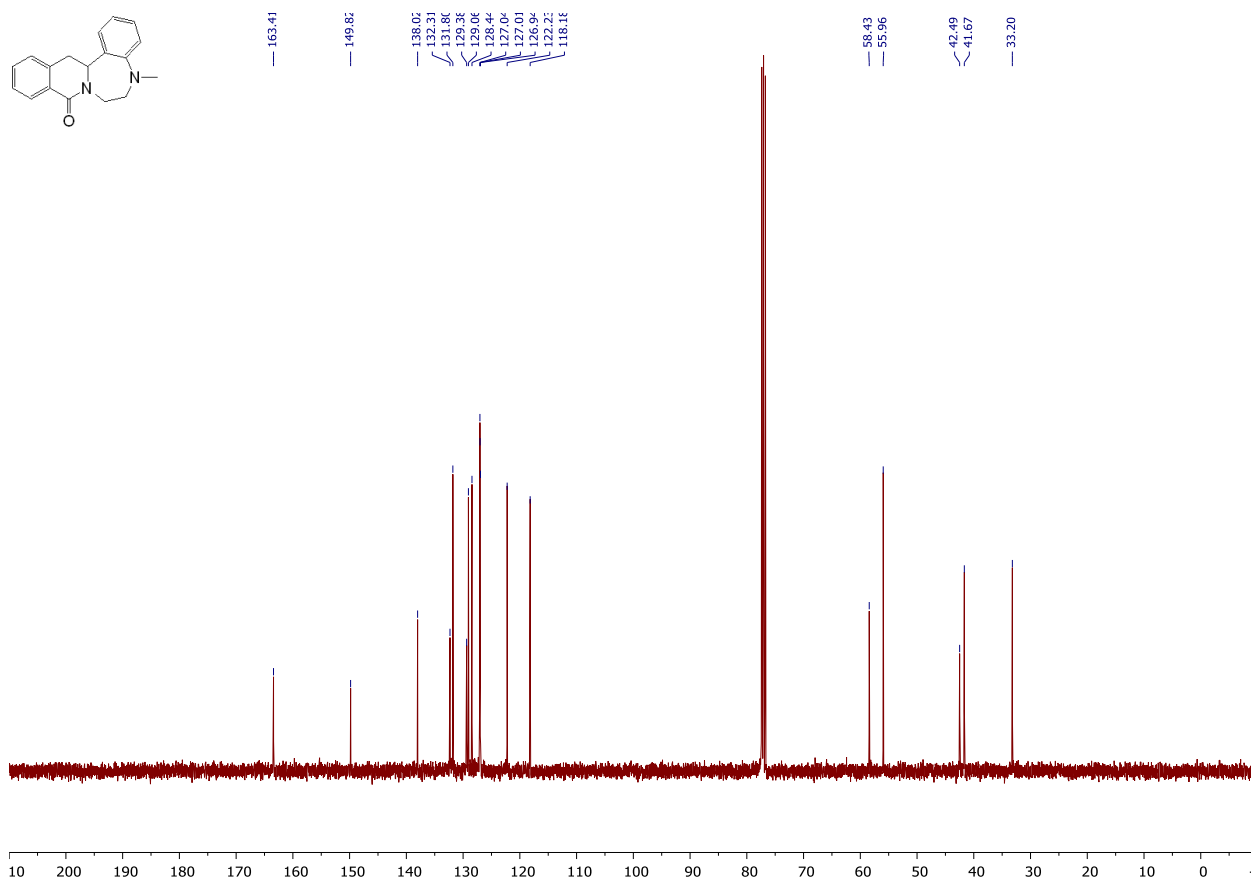

Copies of  $^1\text{H}$  400.13 MHz, DMSO- $d_6$  and  $^{13}\text{C}$  100.61 MHz, DMSO- $d_6$  spectra of **13**

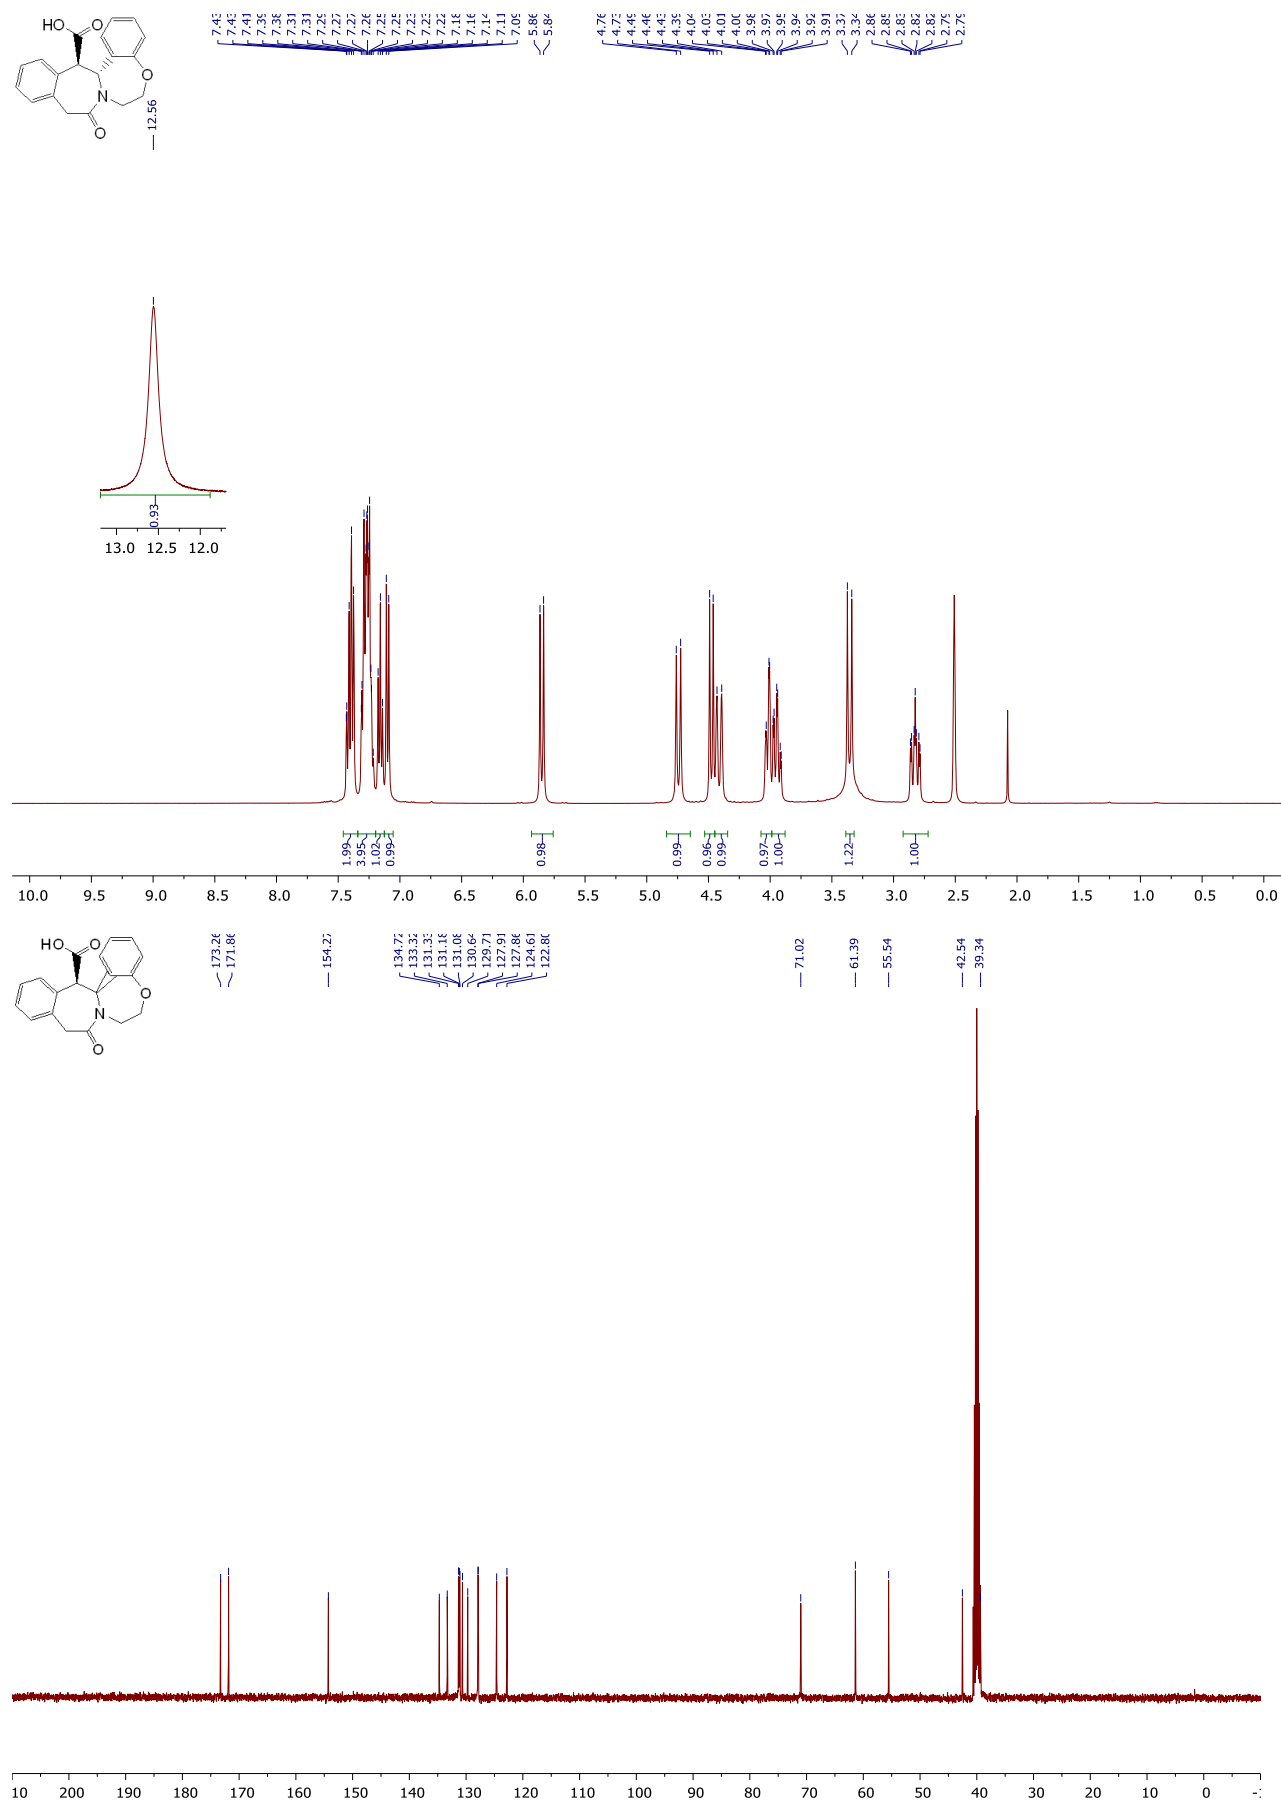

Copies of  $^1\text{H}$  400.13 MHz, DMSO- $d_6$  and  $^{13}\text{C}$  100.61 MHz, DMSO- $d_6$  spectra of **16**

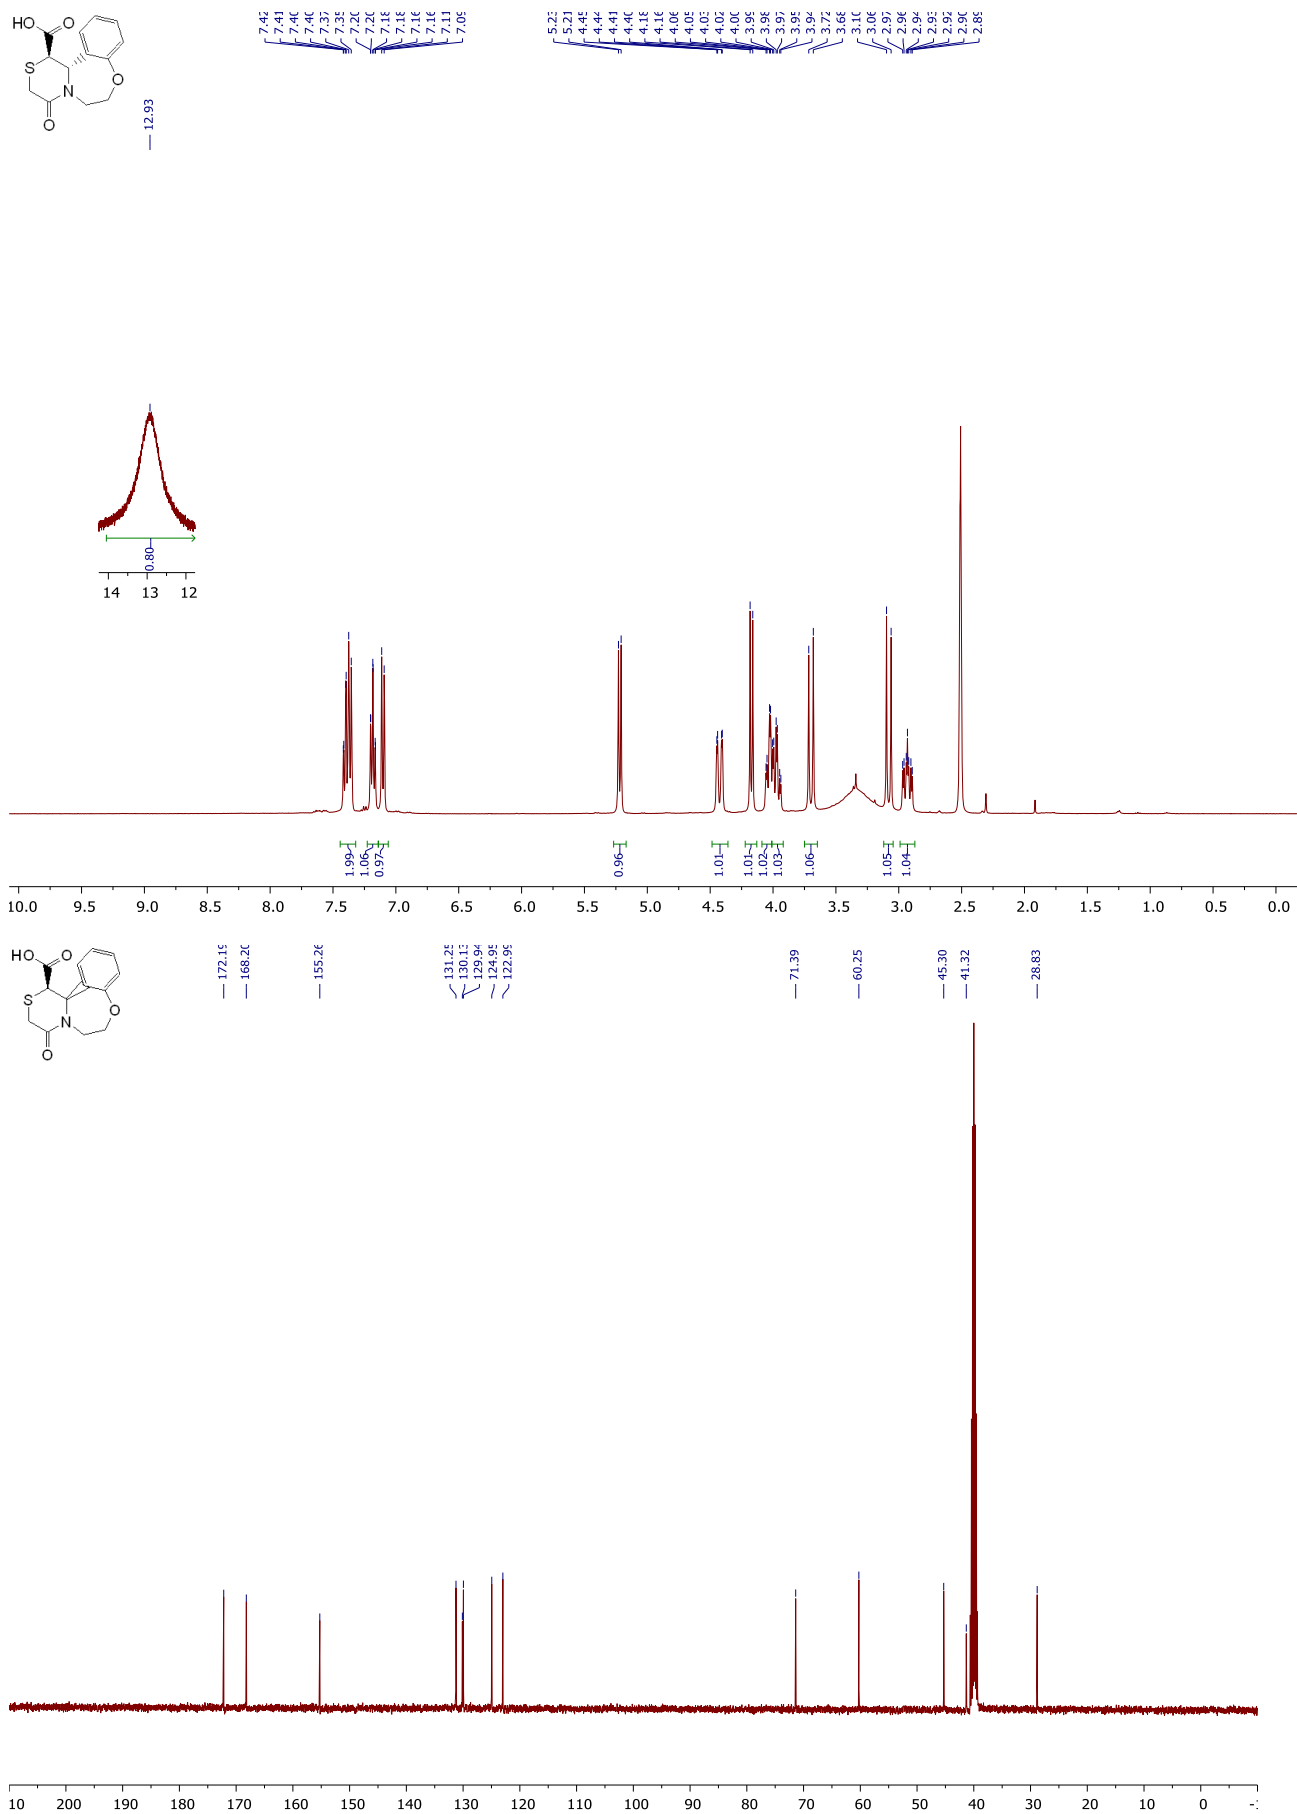



Copies of  $^1\text{H}$  400.13 MHz,  $\text{CDCl}_3$  and  $^{13}\text{C}$  100.61 MHz,  $\text{CDCl}_3$  spectra of **17**

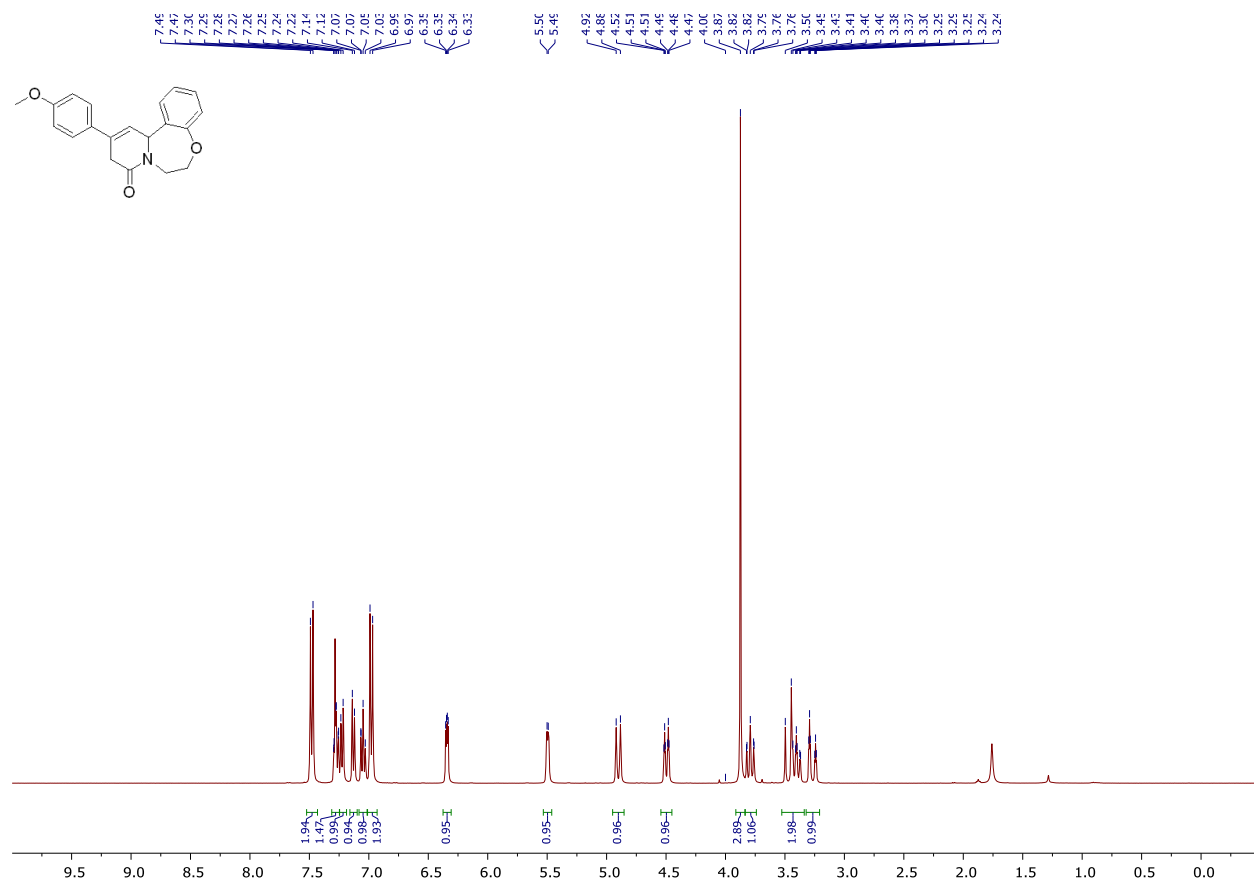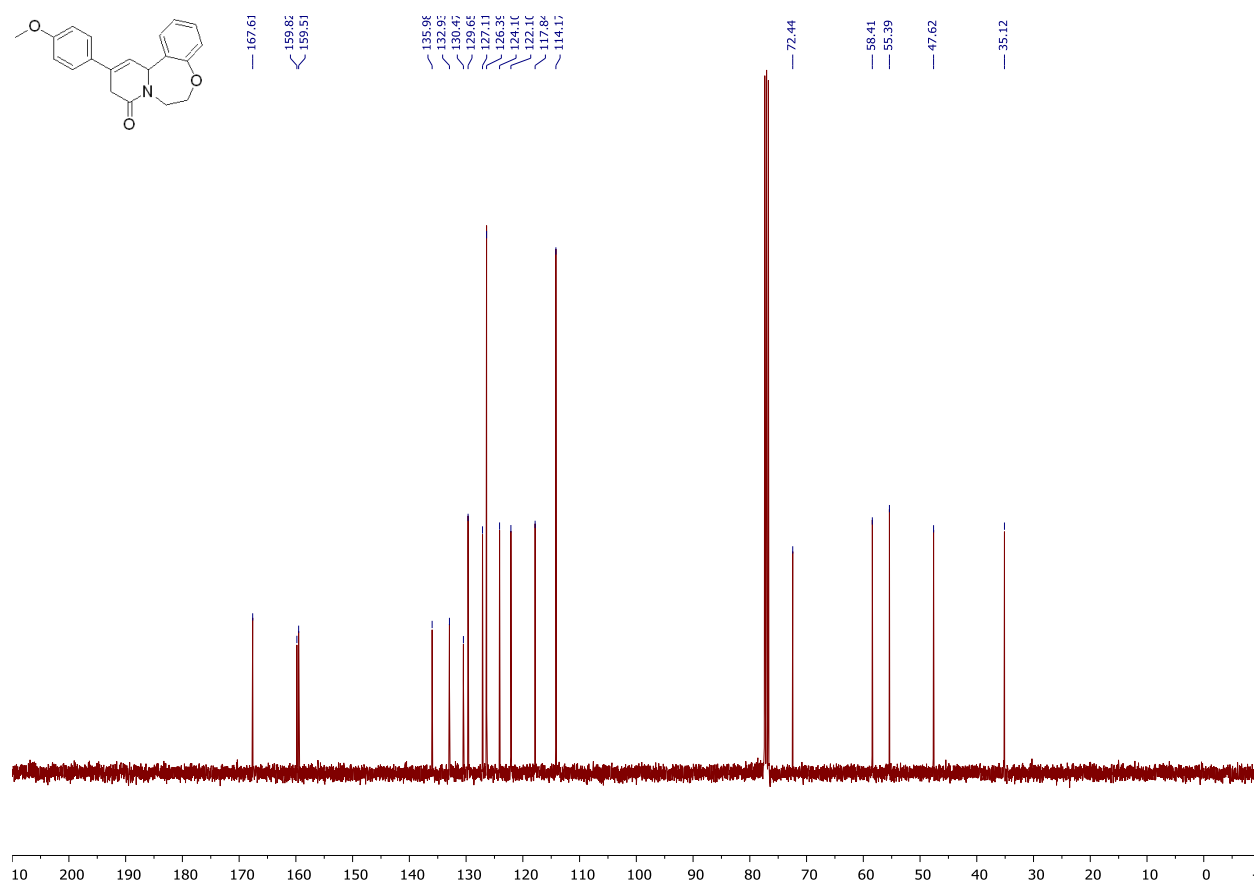

Supplement: s1 [file s1]
